# Supplementary material for: Long-term studies reveal major environmental factors driving zooplankton dynamics and periodicities in the Black Sea coastal zooplankton
Source: PeerJ. 2019 Sep 27;7:e7588. doi: 10.7717/peerj.7588 (PMC6768059; doi:10.7717/peerj.7588)
Supplement: Supplemental Information 1 [file peerj-07-7588-s001.xls]

## Sheet: Лист1
Period	Year	Date	Month	Day	Storm, Swind	Turbid	Winter	Winter Q	NE	T	Noctiluca	L.Mnem <2	Mnem 2-10mm	Mnem 10-45 mm	Mnem >2	Ova Beroe	L.Beroe	Beroe	Aurelia	Efira_Aurelia	Hydromedusae	Rotatoria	Penilia	Evadne	Pleopis_polyph	Pleop_terg	Ova Copepoda	n.Copepoda	Copepodite	Paracal	Oith.sim	Oithona davisae	Acartia	Pseudocal	Centropages	Calan_1-2	Calan_3	Calanus_4	Calanus 5	Calanus 6	Calanus	Sagitta	Oikopleura	Ova_fish	L.Fish	BH	L.Bivalvia	L.Gastropoda	L.Phoronis
1	1991	14	6	164	0	0	6.85	1	0	21	4.29	10.7	0	0	0	0	0	0	0	0	0	0	0	0	4.29	0	0	4.29	0	2.14	0	0	9.29	0	0	0	0	0	0	0	0	0.714	2.14	0	0	0	0.714	0	0
1	1991	27	6	177	0	0	6.85	1	0	23.5	16.4	1.43	0	0	0	0	0	0	0	0	0	0	0	0	75	0	0	5	0	5	9.29	0	33.6	0	0	0	0	0	0	0	0	0	3.57	0	0	0	0.714	2.14	0
1	1991	5	7	185	0	0	6.85	1	0	27	23.6	2.86	0	0	0	0	0	0	0	0	0	0	0	4.29	77.9	0	0	7.14	0	1.43	0.714	0	24.3	0	0	0	0	0	0	0	0	0	4.29	0	0	0	0.714	2.14	5.71
1	1991	16	7	196	0	0	6.85	1	0	25.5	0	3.57	0	18.6	18.6	0	0	0	0	0	0	0	0	0	6.43	0	0	0	0	0	2.14	0	0	0	0	0	0	0	0	0	0	0	0	0	0	0	2.86	0	0
1	1991	24	7	204	0	0	6.85	1	0	26.5	0.714	0	0	0	0	0	0	0	0	0	0	0	0	0	7.86	0	0	0	0	0.714	0	0	161	0	0	0	0	0	0	0	0	0	0	0	0	0	154	0	0
1	1991	9	8	219	0	0	6.85	1	0	29	0	170	0	0	0	0	0	0	0	0	0	0	12.1	0	0	0	0	0	0	5	0	0	67.1	0	0	0	0	0	0	0	0	0	0.714	0	0	0	0	0	0
1	1991	19	8	229	0	0	6.85	1	0	26	0	103	0	0	0	0	0	0	0	0	0	0	1.43	0	0	0	0	0	0	1.43	0	0	32.1	0	0	0	0	0	0	0	0	0	0	0	0	0	0	0	0
1	1991	30	8	240	0	0	6.85	1	0	24.5	0	0	0	0	0	0	0	0	0	0	0	0	0.714	0	0	0	0	0	0	0.714	0	0	24.3	0	0	0	0	0	0	0	0	0	0	0	0	0	0	0	0
1	1991	5	9	245	0	0	6.85	1	0	24	0.714	2.86	0	0	0	0	0	0	0	0	0	0	59.3	0	4.29	0	0	0	0	0.714	0	0	35	0	0	0	0	0	0	0	0	0	0	0	0	0	0	0.714	0
1	1991	16	9	256	0	0	6.85	1	0	22.5	0	13.6	25.7	31.4	57.1	0	0	0	0	0	0	0	0.714	0	0	0	0	0	0	0	0	0	5.71	0	0	0	0	0	0	0	0	0	0	0	0	0	0	0	0
1	1991	25	9	265	0	0	6.85	1	0	21	1.41	23.6	2.14	5	7.14	0	0	0	0	0	0	0	2.86	0	2.86	0	0	0	0	2.14	0	0	21.4	0	0	0	0	0	0	0	0	0	2.14	0	0	0	0	0	0
1	1991	8	10	278	0	0	6.85	1	0	22	0	8.57	1.43	0	1.43	0	0	0	0	0	0	0	7.86	0	2.14	0	0	5	0	2.86	0	0	120	0	0	0	0	0	0	0	0	0	2.86	0	0	0	0	0.714	0
1	1991	18	10	288	0	0	6.85	1	0	21.5	0	5	0	0	0	0	0	0	0	0	0	0	8.57	0	2.14	0	0	0	0	0	0	0	414	0	0	0	0	0	0	0	0	0	4.29	0	0	0	0	0	0
1	1991	30	10	300	0	0	6.85	1	1	15.5	0	2.14	13.6	7.14	20.74	0	0	0	0	0	0	0	0.714	0	0	0	0	0	0	0	0.714	0	10	0	0	0	0	0	0	0	0	0	0.714	0	0	0	0	0	0
1	1991	10	11	310	0	0	6.85	1	0	17.5	0	3.57	2.86	7.14	10	0	0	0	0	0	0	0	0	0	0	0	0	2.14	0	0	0	0	5	0	0	0	0	0	0	0	0	0	0.714	0	0	0	0	0	0
1	1991	21	11	321	0	0	6.85	1	0	16	0	0	0	0	0	0	0	0	0	0	0	0	0	0	0	0	0	1.43	0	0.714	0	0	0.714	0	0	0	0	0	0	0	0	0	0.714	0	0	0	0	0	0
1	1991	3	12	333	0	0	6.85	1	1	11	0	0	0	1.43	1.43	0	0	0	0	0	0	0	0	0	0	0	0	47.1	0	15	15	0	15.7	0	0	0	0	0	0	0	0	0	0	0	0	0	0	0	0
1	1991	13	12	343	0	0	6.85	1	1	10.5	0	0	0	2.86	2.86	0	0	0	0	0	0	0	0	0	0	0	0	1.43	0	2.14	0.714	0	1.43	0	0	0	0	0	0	0	0	0	0	0	0	0	0	0	0
1	1991	23	12	353	0	0	6.85	1	0	12.5	0	0	0	0	0	0	0	0	0	0	0	0	0	0	0.714	0	0	5.71	0	0	0.714	0	11.4	0	0	0	0	0	0	0	0	0	0	0	0	0	1.43	0	0
1	1992	3	1	3	1	1	6.6	1	0	9.2	0	0	0	0	0	0	0	0	0	0	0	0	0	0	0	0	0	10.7	0	2.14	4.29	0	12.1	0	0	0	0	0	0	0	0	0	0	0	0	0	0.714	0	0
1	1992	14	1	14	0	0	6.6	1	0	6.7	0	0	0	0	0	0	0	0	0	0	0	0	0	0	0	0	0	0	0	0	0	0	0.714	0	0	0	0	0	0	0	0	0	0	0	0	0	0	0	0
1	1992	24	1	24	0	0	6.6	1	0	6.5	0	0	0	0	0	0	0	0	0	0	0	0	0	0	0	0	0	12.1	0	17.9	1.43	0	20	2.14	0	0	0	0	0	0	0	0	0	0	0	0	0	0	0
1	1992	5	2	35	1	1	6.6	1	0	7	0	0	0	0	0	0	0	0	0	0	0	0	0	0	0	0	0	33.6	0	40.7	2.14	0	12.9	2.14	0	0	0	0	0	0	0	0	0	0	0	0	0	0	0
1	1992	20	2	50	0	1	6.6	1	0	6.5	0	0	0	0	0	0	0	0	0	0	0	0	0	0	0	0	0	4.29	0	7.14	0	0	0.714	0.714	0	0	0	0	0	0	0	0	0	0	0	0	0	0	0
1	1992	2	3	62	0	0	6.6	1	0	7	0	0	0	0	0	0	0	0	0	0	0	0	0	0	0	0	0	14.3	0	37.9	47.9	0	2.14	0	0	0	0	0	0	0	0	0	0	0	0	0	1.43	0	0
1	1992	12	3	72	0	0	6.6	1	0	10	0	0	0	0	0	0	0	0	0	0	0	0	0	0	0	0	0	12.9	0	15.7	25.7	0	40.7	0	0	0	0	0	0	0	0	0	0	0	0	0	2.14	0	0
1	1992	23	3	83	0	0	6.6	1	0	9.5	0	0	0	0	0	0	0	0	0	0	0	0	0	0	2.14	0	0	25	0	10	7.14	0	18.6	0	0	0	0	0	0	0	0	0	0	0	0	0	15	0	0
1	1992	2	4	92	0	0	6.6	1	0	10.5	0	2.86	0	0	0	0	0	0	0	0	0	0	0	0	6.43	0	0	1.43	0	0.714	1.43	0	9.29	0	0	0	0	0	0	0	0	0	0	0	0	0	264	0	0
1	1992	13	4	103	0	0	6.6	1	0	10	0	0	0	0	0	0	0	0	0	0	0	0	0	0	3.57	0	0	7.14	0	1.43	12.9	0	45	0	0	0	0	0	0	0	0	0	0	0	0	0	15	0	0
1	1992	24	4	114	0	0	6.6	1	0	11	2.14	0	0	0	0	0	0	0	0	0	0	0	0	0	26.4	0	0	12.9	0	3.57	5	0	26.4	0	0	0	0	0	0	0	0	0	0	0	0	0	0.714	0	0
1	1992	5	5	125	0	0	6.6	1	0	15.3	2.14	0	0	0	0	0	0	0	0	0	0	0	0	0	2.14	0	0	4.29	0	5	7.86	0	58.6	0	0	0	0	0	0	0	0	0	0	0	0	0	0	0	0
1	1992	14	5	134	0	0	6.6	1	0	16.5	22.1	0	0	0	0	0	0	0	0	0	0	0	0	0	1.43	0	0	5	0	4.29	1.43	0	17.1	0	0	0	0	0	0	0	0	0	0	0	0	0	0	0	0
1	1992	25	5	145	0	0	6.6	1	0	16.5	78.6	0	0	0	0	0	0	0	0	0	0	0	0	0	10	0	0	10	0	0.714	0	0	62.1	0	0	0	0	0	0	0	0	0	0.714	0	0	0	0	0	0
1	1992	5	6	155	0	0	6.6	1	0	20.5	89.3	0	0	0	0	0	0	0	0	0	0	0	0	0	37.9	0	0	3.57	0	2.14	0.714	0	155	0	0	0	0	0	0	0	0	0	0.714	0	0	0	1.43	0	0
1	1992	16	6	166	0	0	6.6	1	0	21	75	0	0	1.43	1.43	0	0	0	0	0	0	0	0	0	59.3	0	0	3.57	0	7.14	1.43	0	27.1	0	0	0	0	0	0	0	0	0	0.714	0	0	0	16.4	7.86	0
1	1992	29	6	179	0	0	6.6	1	0	21.5	318	1.43	0	1.43	1.43	0	0	0	0	0	0	0	0	0	33.6	0	0	1.43	0	4.29	0.714	0	78.6	0	0	0	0	0	0	0	0	0	10	0	0	0	40.7	12.9	0
1	1992	7	7	187	0	0	6.6	1	0	23	62.9	12.1	0	0	0	0	0	0	0	0	0	0	0	0	4.29	0	0	0	0	10	0	0	7.86	0	0	0	0	0	0	0	0	0	22.1	0	0	0	7.14	1.43	0
1	1992	20	7	200	0	0	6.6	1	0	24.5	4.29	57.9	0	0	0	0	0	0	0	0	0	0	0	0	12.1	0	0	0	0	0	0	0	6.43	0	0	0	0	0	0	0	0	0	0	0	0.714	0	27.9	0	0
1	1992	31	7	211	0	0	6.6	1	0	23.5	0	1.43	4.29	4.29	8.58	0	0	0	0	0	0	0	0	0	1.43	0	0	0	0	0	1.43	0	0.714	0	0	0	0	0	0	0	0	0	1.43	0	0	0	4.29	0	0
1	1992	13	8	223	0	0	6.6	1	0	28	0	73.6	0	0	0	0	0	0	0	0	0	0	0	0	0	0	0	1.43	0	0	0	0	5.71	0	0	0	0	0	0	0	0	0	0	0	0	0	0	0	0
1	1992	25	8	235	0	0	6.6	1	0	26	0	103	0	0	0	0	0	0	0	0	0	0	0	0	0	0	0	0	0	0	0	0	0	0	0	0	0	0	0	0	0	0	0.714	0	0	0	0.714	0	0
1	1992	4	9	244	0	0	6.6	1	0	27	0	20.7	0	0	0	0	0	0	0	0	0	0	3.57	0	0	0	0	0.714	0	0	0	0	7.14	0	0	0	0	0	0	0	0	0	0	0	0	0	3.57	0	0
1	1992	14	9	254	0	0	6.6	1	0	22.5	0	95.7	0	0	0	0	0	0	0	0	0	0	0	0	0	0	0	0	0	0	0	0	1.43	0	0	0	0	0	0	0	0	0	0	0	0	0	0	0	0
1	1992	28	9	268	0	0	6.6	1	0	20	0	0.714	5	1.43	6.43	0	0	0	0	0	0	0	0	0	0	0	0	0	0	0	0	0	3.57	0	0	0	0	0	0	0	0	0	0	0	0	0	0	0	0
1	1992	8	10	278	0	0	6.6	1	0	20	0	29.3	12.1	3.57	15.67	0	0	0	0	0	0	0	0	0	0	0	0	0	0	0	0	0	0	0	0	0	0	0	0	0	0	0	0	0	0	0	0	0	0
1	1992	21	10	291	0	0	6.6	1	0	18	0	4.29	4.29	2.86	7.15	0	0	0	0	0	0	0	0	0	0	0	0	0	0	0	0	0	3.57	0	0	0	0	0	0	0	0	0	2.14	0	0	0	0	0	0
1	1992	3	11	303	0	0	6.6	1	1	17	0.714	2.86	14.3	26.4	40.7	0	0	0	0	0	0	0	0	0	0	0	0	2.14	0	0	0	0	1.43	0	0	0	0	0	0	0	0	0	2.14	0	0	0	0	0	0
1	1992	18	11	318	0	1	6.6	1	0	16	0	0	0	0	0	0	0	0	0	0	0	0	0	0	0	0	0	0	0	0	0.714	0	6.43	0	0	0	0	0	0	0	0	0	0	0	0	0	0.714	0	0
1	1992	1	12	331	0	0	6.6	1	1	9	2.14	0	0	0	0	0	0	0	0	0	0	0	0	0	0	0	0	0.714	0	0.714	15	0	2.14	0	0	0	0	0	0	0	0	0	0	2.14	0	0	6.43	0	0
1	1992	10	12	340	0	0	6.6	1	0	11.5	0	0	0	0	0	0	0	0	0	0	0	0	0	0	0	0	0	3.57	0	1.43	1.43	0	2.14	0	0	0	0	0	0	0	0	0	0	0	0	0	0	0	0
1	1992	23	12	353	0	0	6.6	1	0	10	0.714	0	0.714	0	0.714	0	0	0	0	0	0	0	0	0	1.43	0	0	14.3	0	7.86	19.3	0	11.4	0	0	0	0	0	0	0	0	0	0.714	0	0	0	2.86	0	0
1	1993	10	1	10	0	0	6.5	1	1	6.5	0	0	0	0.714	0.714	0	0	0	0	0	0	0	0	0	0	0	0	19.3	0	22.9	0	0	42.1	0	0	0	0	0	0	0	0	0	0	0	0	0	0	0	0
1	1993	20	1	20	0	0	6.5	1	0	8	0	0	2.14	11.4	13.54	0	0	0	0	0	0	0	0	0	0	0	0	12.9	14.3	31.4	0	0	11.4	0	0	0	0	0	0	0	0	0	0	0	0	0	22.1	0	0
1	1993	1	2	31	0	0	6.5	1	0	6	0.714	0	0	0	0	0	0	0	0	0	0	0	0	0	0	0	0	0	0	11.4	7.14	0	0.714	0	0	0	0	0	0	0	0	0	0	0	0	0	0.714	0	0
1	1993	11	2	41	0	0	6.5	1	0	6	0	0	0	0	0	0	0	0	0	0	0	0	0	0	0	0	0	2.86	0	7.86	12.9	0	5	0	0	0	0	0	0	0	0	0	0	0	0	0	0	0	0
1	1993	22	2	52	1	1	6.5	1	0	7	0	0	0	0	0	0	0	0	0	0	0	0	0	0	0	0	0	6.43	5.71	16.4	17.1	0	12.1	0	0	0	0	0	0	0	0	0	0	0	0	0	47.9	3.57	0
1	1993	1	3	61	0	0	6.5	1	0	7	0	0	0	0	0	0	0	0	0	0	0	0	0	0	0	0	0	11.4	2.14	12.1	35.7	0	25	0	0	0	0	0	0	0	0	0	0	0	0	0	18.6	0	0
1	1993	11	3	71	0	0	6.5	1	0	7.4	0	0	0	0	0	0	0	0	0	0	0	0	0	0	4.29	0	0	57.1	55	44.3	159	0	78.6	0	0	0	0	0	0	0	0	0	0	0	0	0	37.9	0.714	0
1	1993	22	3	82	0	0	6.5	1	0	8.5	1.43	0	0	0.714	0.714	0	0	0	0	0	0	0	0	0	0.714	0	0	8.57	10.7	12.9	40.7	0	7.14	0	0	0	0	0	0	0	0	0	0	0	0	0	16.4	0	0
1	1993	2	4	92	0	0	6.5	1	0	10	0	0	0	0.714	0.714	0	0	0	0	0	0	0	0	0	0	0	0	4.29	9.29	5.71	68.6	0	23.6	0	0	0	0	0	0	0	0	0	0	0	0	0	11.4	0	0
1	1993	12	4	102	1	1	6.5	1	0	11.2	0.714	0	0	0	0	0	0	0	0	0	0	0	0	0	1.43	0	0	0	2.14	3.57	1.43	0	30	0	0	0	0	0	0	0	0	0	0	0	0	0	28.6	0.714	0
1	1993	22	4	112	0	0	6.5	1	0	9.5	6.43	0	0	0	0	0	0	0	0	0	0	0	0	0	1.43	0	0	10.7	5.71	5	76.4	0	95	0	0	0	0	0	0	0	0	0	0	0	0	0	15.7	0	0
1	1993	5	5	125	0	0	6.5	1	0	12.5	206	0	0	0	0	0	0	0	0	0	0	0	0	0	0.714	0	0	22.9	0	1.43	2.86	0	12.1	0	0	0	0	0	0	0	0	0	2.14	0	0	0	5	0	0
1	1993	14	5	134	0	0	6.5	1	0	14.1	5660	0	0	0	0	0	0	0	0	0	0	0	0	0.714	43.6	0	0	40	0	3.57	5.71	0	26.4	0	0	0	0	0	0	0	0	0	16.4	0	0	0	0	0	0
1	1993	24	5	144	0	0	6.5	1	0	14	2460	0	0	0	0	0	0	0	0	0	0	0	0	0.714	11.4	0	0	10	0	36.4	243	0	221	0	0	0	0	0	0	0	0	0	48.6	0	0	0	5	0	0
1	1993	2	6	152	0	0	6.5	1	0	19	3610	0	0	0	0	0	0	0	0	0	0	0	0	0	2.14	0	0	0.714	0	3.57	9.29	0	5.71	0	0	0	0	0	0	0	0	0	2.14	0	0	0	243	0	0
1	1993	11	6	161	0	0	6.5	1	0	19.5	1950	0	0	0	0	0	0	0	0	0	0	0	0	0	19.3	0	0	7.14	0	5	7.86	0	5.71	0	0	0	0	0	0	0	0	0	0.714	0	0	0	12.1	0	0
1	1993	21	6	171	0	0	6.5	1	0	20.5	500	0.714	0	0	0	0	0	0	0	1.43	0	0	0	0	0	20	0	8.57	0	1.43	0	0	5.71	0	0	0	0	0	0	0	0	0	0	0.714	0.714	0	59.3	0	0
1	1993	2	7	182	0	1	6.5	1	0	21.5	48.6	0	0	0	0	0	0	0	0	0	0	0	0	0	91.4	0	0	0.714	0	0	0.714	0	5	0	0	0	0	0	0	0	0	0	0	0	0.714	0	2.14	3.57	0
1	1993	12	7	192	0	0	6.5	1	0	21.5	22.1	2.14	0	0	0	0	0	0	0	0	0	0	0	0	182	0	0	19.3	0	8.57	1.43	0	114	0	0	0	0	0	0	0	0	0	2.86	0	0	0	25.7	0	0
1	1993	21	7	201	0	0	6.5	1	0	26	0	2.86	0	0	0	0	0	0	0	0	0	0	0	2.14	31.4	0	0	0.714	0	0	0	0	4.29	0	0	0	0	0	0	0	0	0	4.29	0	0	0	17.1	0.714	0
1	1993	2	8	212	0	0	6.5	1	0	24	7.86	1.43	0	0	0	0	0	0	0	0	0	0	0	0	0	0	0	4.29	0	17.1	0	0	12.9	0	0	0	0	0	0	0	0	0	27.9	0	0	0	5	0.714	0
1	1993	12	8	222	0	0	6.5	1	0	25	0	88.6	5.71	0	5.71	0	0	0	1.43	0	0	0	0	0	3.57	0	0	0	0	0.714	0	0	13.6	0	0	0	0	0	0	0	0	0	1.43	0	0	0	5.71	0	0
1	1993	23	8	233	0	0	6.5	1	0	24.5	0	0	0	0	0	0	0	0	0.714	0	0	0	69.29	0	6.43	0	0	0	0	2.86	0	0	8.57	0	0	0	0	0	0	0	0	0	7.86	0	0	0	1.43	0	0
1	1993	2	9	242	0	0	6.5	1	0	23.5	0.714	25.7	0	0	0	0	0	0	0	0	0	0	3.57	0	0	0	0	0.714	0	0	0	0	3.57	0	0	0	0	0	0	0	0	0	1.43	0	0	0	0	0	0
1	1993	13	9	253	0	0	6.5	1	0	20	12.1	24.3	0	0.714	0.714	0	0	0	0.714	0	0	0	0	0	0	0	0	2.86	0	0	1.43	0	50	0	0	0	0	0	0	0	0	0	4.29	0	0	0	0	0	0
1	1993	21	9	261	0	0	6.5	1	1	11.5	19.3	0	0	0	0	0	0	0	0	0	0	0	0	0	0	0	0	3.57	0	3.57	33.6	0	24.3	0	0	0	0	0	0	0	0	0	5	0	0	0	0	0	0
1	1993	1	10	271	0	0	6.5	1	0	14.5	6.43	2.14	0	0	0	0	0	0	0.714	0	0	0	5.7	0	5.7	2.14	0	20	0	1.43	0	0	47.1	0	0	0	0	0	0	0	0	0	9.29	0	0	0	0	0	0
1	1993	11	10	281	0	0	6.5	1	0	19	0.714	6.43	0	0	0	0	0	0	0.714	0	0	0	1.43	0	2.14	0	0	2.14	0	5	0	0	19.3	0	0	0	0	0	0	0	0	0	0.714	0	0	0	0	0	0
1	1993	22	10	292	0	0	6.5	1	0	19.2	0.714	4.29	1.43	1.43	2.86	0	0	0	0	0	0	0	3.57	0	10.7	0	0	27.9	0	2.86	0	0	7.86	0	0	0	0	0	0	0	0	0	8.57	0	0	0	0	0	0
1	1993	1	11	301	0	0	6.5	1	0	10.5	12.9	0.714	0	0	0	0	0	0	0.714	0	0	0	0.714	0	4.3	0	0	26.4	0	2.14	11.4	0	10.7	0	0	0	0	0	0	0	0	0	7.86	0	0	0	5.71	0	0
1	1993	15	11	315	0	0	6.5	1	1	6.5	2.86	0	0	0	0	0	0	0	0	0	0	0	0	0	9.29	0	0	67.1	2.86	11.4	29.3	0	4.29	0	0	0	0	0	0	0	0	0	22.9	1.43	0	0	1.43	0	0
1	1993	22	11	322	0	0	6.5	1	0	9	0	0.714	0	0	0	0	0	0	0.714	0	0	0	0	0	5	0	0	30.7	1.43	0	1.43	0	18.6	0	0	0	0	0	0	0	0	0	10	0.714	0	0	3.57	0	0
1	1993	2	12	332	0	0	6.5	1	0	6.5	0	0	0	2.14	2.14	0	0	0	0	0	0	0	0	0	1.43	0	0	106	22.1	73.6	19.3	0	28.6	0	0	0	1.43	0.714	0	0	2.144	0	11.4	0	0	0	20	0	0
1	1993	22	12	352	0	0	6.5	1	0	9	0	0	0	0	0	0	0	0	0	0	0	0	0	0	0	0	0	2.14	0	0	0	0	0	0	0	0	0	0	0	0	0	0	0	0	0.714	0	0.714	0	0
1	1993	30	12	360	0	0	6.5	1	0	9	1.43	0	0	0	0	0	0	0	0	0	0	0	0	0	0	0	0	0.714	0	2.14	2.86	0	0	0	0	0	0	0	0	0	0	0	0	0	0	0	10	0	0
1	1994	10	1	10	0	0	6.7	1	0	10	0	0	0	0.714	0.714	0	0	0	0	0	0	0	0	0	0.714	0	0	3.57	0.714	7.14	7.86	0	0	0	0	0	0	0	0	0	0	0	0	0	0	0	1.43	0	0
1	1994	21	1	21	0	0	6.7	1	0	8	0	0	0	0	0	0	0	0	0	0	0	0	0	0	0.714	0	0	2.86	1.43	3.57	0.714	0	1.43	0	0	0	0	0	0	0	0	0	0	0	0	0	2.14	0	0
1	1994	31	1	31	0	0	6.7	1	0	7	1.43	0	0	1.43	1.43	0	0	0	0	0	0	0	0	0	1.43	0	0	48.6	7.14	28.6	20	0	47.9	0	0	0	0	0	0	0	0	0	0.714	0	0	0	7.86	0.714	0
1	1994	10	2	40	0	0	6.7	1	0	7.5	2.14	0	0	0.714	0.714	0	0	0	0	0	0	0	0	0	2.14	0	0	20	0.714	6.43	7.86	0	7.14	0	0	0	0	0	0	0	0	0	0	0	0	0	2.14	0	0
1	1994	23	2	53	0	0	6.7	1	0	7.2	0	0.714	0	1.43	1.43	0	0	0	0	0	0	0	0	0	6.43	0	0	15.7	0	7.86	2.86	0	17.1	0.714	0	0	0	0	0	0	0	0	0	0	0	0	2.14	0	0
1	1994	3	3	63	0	0	6.7	1	0	9	0	0	0	0	0	0	0	0	0	0	0	0	0	0	2.14	0	0	6.43	0	9.29	6.43	0	12.1	0	0	0	0	0	0	0	0	0	0	0	0	0	0.714	0	0
1	1994	11	3	71	0	0	6.7	1	0	9	2.14	0	0.714	3.57	4.284	0	0	0	0	0	0	0	0	0	2.86	0	0	2.14	0	7.14	6.43	0	16.4	0	0	0	0	0	0	0	0	0	0	0	0	0	1.43	0	0
1	1994	21	3	81	0	0	6.7	1	0	9	0	0	0	0	0	0	0	0	0	0	0	0	0	0	1.43	0	0	10	0	2.86	4.29	0	47.1	0	0	0	0	0	0	0	0	0	0	0	0	0	2.14	0	0
1	1994	1	4	91	0	0	6.7	1	0	10.5	50	0	0	0	0	0	0	0	0	0	0	0	0	0	1.43	0	0	154	3.57	9.29	2.14	0	15	0	0	0	0	0	0	0	0	0	0	0	0	0	6.43	0	0
1	1994	12	4	102	0	0	6.7	1	0	12	0.714	0	0	0	0	0	0	0	0	0	0	0	0	0	17.9	0	0	10.7	0	0.714	1.43	0	19.3	0	0	0	0	0	0	0	0	0	0	0	0	0	15	0	0
1	1994	21	4	111	0	0	6.7	1	0	14.5	0	0	0	0	0	0	0	0	0	0	0	0	0	0	2.14	0	0	0.714	0	1.43	0.714	0	0	0	0	0	0	0	0	0	0	0	0	0	0	0	0	0	0
1	1994	29	4	119	0	0	6.7	1	0	14.7	2.86	0	0	0	0	0	0	0	0	0	0	0	0	0	0	0	0	0	1.43	1.43	0	0	5	0	0	0	0	0	0	0	0	0	1.43	0	0	0	0	0	0
1	1994	12	5	132	0	0	6.7	1	0	14.5	126	0	0	0	0	0	0	0	0	0.714	0	0	0	0	116	0	0	6.43	0	0.714	1.43	0	23.6	0	0	0	0	0	0	0	0	0	1.43	0	0	0	0.714	0	0
1	1994	23	5	143	0	0	6.7	1	0	14.5	661	0	0	0	0	0	0	0	0	0.714	0	0	0	0	64.3	0	0	9.29	0	1.43	0	0	3.57	0	0	0	0	0	0	0	0	0	2.14	0	0	0	2.86	0	0
1	1994	2	6	152	0	0	6.7	1	0	16.5	859	0	0	0	0	0	0	0	0	0	0	0	0	0	10	0	0	0.714	0	0	5	0	0	0	0	0	0	0	0	0	0	0	0	0.714	0	0	0	1.43	0
1	1994	15	6	165	0	0	6.7	1	0	19	12200	0	0	0	0	0	0	0	0	0	0	0	0	0	67.9	0	0	0.714	0	0.714	0.714	0	5.71	0	0	0	0	0	0	0	0	0	0.714	0	0	0	0	0	0
1	1994	21	6	171	0	0	6.7	1	0	20.5	183	0	0	0	0	0	0	0	0	0	0	0	0	0	23.6	0	0	0.714	0	0.714	0	0	1.43	0	0	0	0	0	0	0	0	0	0	0	0	0	1.43	0	0
1	1994	4	7	184	0	0	6.7	1	0	21.5	758	0	0	0	0	0	0	0	0	0	0	0	0	0	20	0	0	1.43	0	7.14	0	0	2.14	0	0	0	0	0	0	0	0	0	10	0.714	0	0	1.43	0	0
1	1994	13	7	193	0	0	6.7	1	0	24.5	53.6	0	0	0	0	0	0	0	0	0	0	0	0	0	57.14	4.29	0	2.86	0	5.71	3.57	0	13.6	0	0	0	0	0	0	0	0	0	7.14	0	0	0	0.714	0	0
1	1994	22	7	202	0	0	6.7	1	0	25	14.3	7.14	0	0	0	0	0	0	0	0	0	0	0.714	0	35.7	0.714	0	1.43	0	0	0.714	0	17.9	0	0	0	0	0	0	0	0	0	2.86	0	0	0	4.29	0	0
1	1994	3	8	213	0	0	6.7	1	0	23.5	1.43	0.714	0	0	0	0	0	0	0	0.714	0	0	0	0.714	2.14	1.43	0	0.714	0	0.714	0	0	25.7	0	0	0	0	0	0	0	0	0	1.43	0	0	0	5	2.14	0
1	1994	11	8	221	0	0	6.7	1	0	25.5	0.714	28.6	16.4	1.43	17.83	0	0	0	0	0.714	0	0	8.57	0	0	0	0	0	0	0.714	0	0	40.7	0	0	0	0	0	0	0	0	0	0	0	0	0	10.7	0	0
1	1994	22	8	232	0	0	6.7	1	0	25	2.86	23.6	1.43	1.43	2.86	0	0	0	0	1.43	0	0	2.86	0	0	0	0	0	0	5.71	0	0	60.7	0	0	0	0	0	0	0	0	0	0	0.714	0	0	0	0	0
1	1994	2	9	242	0	0	6.7	1	0	24.5	0	17.9	0	0	0	0	0	0	0	0	0	0	1.43	0	0	0	0	0	0	0	0	0	33.6	0	0	0	0	0	0	0	0	0	2.14	0	0	0	0	0	0
1	1994	21	9	261	0	0	6.7	1	0	25	0	2.14	0	0	0	0	0	0	0	0	0	0	2.86	0	0	0	0	2.14	0	18.6	0	0	30	0	0	0	0	0	0	0	0	0	0.714	0	0	0	0	0	0
1	1994	5	10	275	0	0	6.7	1	0	24	0	7.86	0	0	0	0	0	0	0	0	0	0	0	5	6.43	19.29	0	0	0	37.9	0	0	57.1	0	0	0	0	0	0	0	0	0	7.14	0	0	0	0	0	0
1	1994	12	10	282	0	0	6.7	1	0	23.5	0	45	0	0	0	0	0	0	0	0	0	0	4.29	0	1.43	0	0	0	0	15.7	0	0	7.14	0	0	0	0	0	0	0	0	0	2.86	0	0	0	0	0	0
1	1994	24	10	294	0	0	6.7	1	0	17.5	0	1.43	0	0	0	0	0	0	0	0	0	0	0	0	1.43	0	0	0	0.714	5.71	0	0	10.7	0	0	0	0	0	0	0	0	0	0	0	0	0	0	0	0
1	1994	2	11	302	0	0	6.7	1	0	18.5	0	4.29	0.714	2.14	2.854	0	0	0	0	0	0	0	0	0	0.714	0	0	1.43	0	0	0	0	1.43	0	0	0	0	0	0	0	0	0	0	0	0	0	0	0	0
1	1994	11	11	311	0	0	6.7	1	0	13	0	1.43	0	1.43	1.43	0	0	0	0	0	0	0	0	0	0	0	0	4.29	0	2.14	5	0	0	0	0	0	0	0	0	0	0	0	0	0	0	0	0	0	0
1	1994	23	11	323	0	0	6.7	1	0	11	3.57	1.43	0	0.714	0.714	0	0	0	0	0	0	0	0	0	0.714	0	0	5.71	0	5.71	10	0	35	0	0	0	0	0	0	0	0	0	2.14	0	0	0	0.714	0	0
1	1994	1	12	331	0	0	6.7	1	0	9.5	2.14	0.714	0	0	0	0	0	0	0	0	0	0	0	0	0	0	0	0	1.43	5	2.86	0	5	0	0	0	0	0	0	0	0	0	0	0	0	0	0	0	0
1	1994	15	12	345	0	1	6.7	1	0	9.5	0	0	0	0	0	0	0	0	0	0	0	0	0	0	0	0	0	25	0.714	2.86	0	0	5.71	0	0	0	0	0.714	0	0	0.714	0	0	0	0	0	0	0	0
1	1994	30	12	360	0	0	6.7	1	0	10	0	0	0	0.714	0.714	0	0	0	0	0	0	0	0	0	0	0	0	2.14	0	1.43	0.714	0	0	0	0	0	0	0	0	0	0	0	0.714	0	0	0	34.3	5	0
1	1995	3	1	3	0	0	6.95	1	0	9.5	0.714	0	0	0	0	0	0	0	0	0	0	0	0	0	2.86	0	0	6.43	0	3.57	1.43	0	1.43	0	0	0	0	0	0	0	0	0	0.714	0	0	0	2.86	0	0
1	1995	10	1	10	0	0	6.95	1	0	10	5	0	0.714	2.14	2.854	0	0	0	0	0	0	0	0	0	0	0	0	3.57	0	10	13.6	0	5	0	0	0	0	0	0	0	0	0	0	0	0	0	0	0	0
1	1995	18	1	18	0	0	6.95	1	0	9.5	2.14	0	0.714	3.57	4.284	0	0	0	0	0	0	0	0	0	0.714	0	0	9.29	0	5	0.714	0	2.14	0	0	0	0	0	0	0	0	0	0	0	0	0	10	0.714	0
1	1995	28	1	28	0	0	6.95	1	0	9.5	3.57	0	0	0	0	0	0	0	0	0	0	0	0	0	11.4	0	0	5	0	5	3.57	0	5	0	0	0	0	0	0	0	0	0	0	0	0	0	2.86	0	0
1	1995	21	2	51	0	0	6.95	1	0	9	0.714	0.714	0	0	0	0	0	0	0	0	0	0	0	0	0	0	0	0	0	0.714	0.714	0	2.86	0	0	0	0	0	0	0	0	0	0	0.714	0	0	1.43	0.714	0
1	1995	11	3	71	0	0	6.95	1	0	11.5	4.29	0	0	0	0	0	0	0	0	0	0	0	0	0	7.86	0	0	10	4.29	2.14	2.14	0	21.4	0	0	0	0	0	0	0	0	0	0	0	0	0	0	0	0
1	1995	23	3	83	0	0	6.95	1	0	9.5	0.714	0	0	0.714	0.714	0	0	0	0	0	0	0	0	0	1.43	0	0	5.71	0	2.86	1.43	0	56.4	0	0	0	0	0	0	0	0	0	0	0	0	0	2.14	0	0
1	1995	31	3	91	0	0	6.95	1	0	11	0	0	0	0	0	0	0	0	0	0	0	0	0	0	5	0	0	12.9	3.57	2.86	0.714	0	12.1	0	0	0	0	0	0	0	0	0	0	0	0	0	0	0	0
1	1995	12	4	102	0	0	6.95	1	0	10.5	17.9	0.714	0	0	0	0	0	0	0	0	0	0	0	0	2.86	0	0	3.57	0	2.14	0	0	0.714	0	0	0	0	0	0	0	0	0	0	0	0	0	0.714	0	0
1	1995	24	4	114	0	0	6.95	1	0	11.5	2.86	0	0	0	0	0	0	0	0	0	0	0	0	0	0.714	0	0	0	0	0	0	0	1.43	0	0	0	0	0	0	0	0	0	0	0	0	0	0	0	0
1	1995	3	5	123	0	0	6.95	1	0	13	3.57	0.714	0	10	10	0	0	0	0	0	0	0	0	0	0	0	0	0.714	0	0	0	0	0.714	0	0	0	0	0	0	0	0	0	0	0	0	0	0	0	0
1	1995	12	5	132	0	0	6.95	1	0	15	416	0	0	0	0	0	0	0	0	0	0	0	0	0	0	0	0	0.714	0.714	3.57	0	0	0	0	0	0	0	0	0	0	0	0	0	0.714	0	0	0	0	0
1	1995	22	5	142	0	0	6.95	1	0	17	845	0	0	0	0	0	0	0	0	0	0	0	0	0	12.9	0	0	4.29	0.714	2.86	4.29	0	6.43	0	0	0	0	0	0	0	0	0	0.714	0	0	0	0	0	0
1	1995	1	6	151	0	0	6.95	1	0	20	2060	0	0	2.14	2.14	0	0	0	0	0	0	0	0	0	77.9	0	0	11.4	0	4.29	0	0	10.7	0	0	0	0	0	0	0	0	0	2.86	0.714	0	0	0	0	0
1	1995	9	6	159	0	0	6.95	1	0	18	6290	0	0	0	0	0	0	0	0	0	0	0	0	0	27.9	0	0	7.86	0	12.9	0	0	27.9	0	0	0	0	0	0	0	0	0	0	0.714	0	0	0	0	0
1	1995	21	6	171	0	0	6.95	1	0	16	68.6	0	0	0	0	0	0	0	0	0	0	0	0	0	70	0	0	7.14	0	17.1	21.4	0	128	0	0	0	0	0	0	0	0	0	9.29	0.714	0	0	0	13.6	0
1	1995	3	7	183	0	0	6.95	1	0	23	36.4	16.4	0.714	1.43	2.144	0	0	0	0	0	0	0	0.714	0	12.19	0	0	0	0	11.4	0	0	41.4	0	0	0	0	0	0	0	0	0	22.9	0.714	0	0	0	2.86	0
1	1995	10	7	190	0	0	6.95	1	0	23	45	436	0	7.14	7.14	0	0	0	0	0	0	0	2.14	0	15.76	0	0	0	0	0	0	0	57.9	0	0	0	0	0	0	0	0	0	21.4	0	0	0	81.4	6.43	0
1	1995	21	7	201	0	0	6.95	1	0	25.5	2.86	223	0	0	0	0	0	0	0	0	0	0	328	0	0	0	0	0	7.14	4.29	0	0	70.7	0	0	0	0	0	0	0	0	0	47.9	0.714	0	0	0	0	0
1	1995	31	7	211	0	0	6.95	1	0	25.5	0	329	0	0	0	0	0	0	0	0	0	0	25	0	0	0	0	0	0	0	0	0	1.43	0	0	0	0	0	0	0	0	0	2.86	0.714	0	0	0	0	0
1	1995	10	8	220	0	0	6.95	1	0	25	0	81.4	0	0	0	0	0	0	0	0	0	0	6.43	0	0	0	0	1.43	0	0.714	0	0	0	0	0	0	0	0	0	0	0	0	1.43	0	0	0	0	0	0
1	1995	21	8	231	0	0	6.95	1	0	25	0	10.7	0	0	0	0	0	0	0	0	0	0	53.6	0	0	0	0	0	1.43	1.43	0	0	16.4	0	0	0	0	0	0	0	0	0	1.43	2.86	0	0	0	0	0
1	1995	30	8	240	0	0	6.95	1	0	25	0	5	0	0	0	0	0	0	0	0	0	0	0	0	0	0	0	0.714	4.29	2.14	0	0	15.7	0	0	0	0	0	0	0	0	0	2.14	0	0	0	0	0	0
1	1995	11	9	251	0	0	6.95	1	0	22.5	0	4.29	0	0	0	0	0	0	0	0	0	0	73.6	0	0	0	0	0	4.29	7.14	0	0	49.3	0	0	0	0	0	0	0	0	0	2.14	0	0	0	0	0	0
1	1995	21	9	261	0	0	6.95	1	0	20.5	0	22.1	2.14	0.714	2.854	0	0	0	0.714	0	0	0	11.4	0	0	0	0	0.714	0	1.43	0	0	8.57	0	0	0	0	0	0	0	0	0	0.714	0	0	0	0	0	0
1	1995	2	10	272	0	0	6.95	1	0	20	0	1.43	0	0	0	0	0	0	0	0	0	0	1.43	0	0	0	0	0.714	0	1.43	0	0	80	0	0	0	0	0	0	0	0	0	0.714	0	0	0	0	0	0
1	1995	13	10	283	0	0	6.95	1	0	18.5	2.86	30.7	8.57	2.86	11.43	0	0	0	0	0	0	0	1.43	0	0	0	0	0	0	0	0	0	2.86	0	0	0	0	0	0	0	0	0	0.714	0	0	0	0	0	0
1	1995	23	10	293	0	0	6.95	1	0	16	4.29	2.14	10	11.4	21.4	0	0	0	0	0	0	0	0.714	0	0	0	0	10	0	1.43	0.714	0	5.71	0	0	0	0	0	0	0	0	0	1.43	0.714	0	0	0	0	0
1	1995	2	11	302	0	0	6.95	1	0	17	7.14	3.57	11.4	10	21.4	0	0	0	0	0	0	0	1.43	0	0	0	0	0.714	0	0	0.714	0	0.714	0	0	0	0	0	0	0	0	0	2.14	0	0	0	0	0	0
1	1995	13	11	313	0	0	6.95	1	0	12.5	1.43	0	0	0	0	0	0	0	0	0	0	0	0	0	0	0	0	0	0	0	0	0	0	0	0	0	0	0	0	0	0	0	0	0.714	0	0	0	0	0
1	1995	21	11	321	0	0	6.95	1	0	11	0.714	13.6	0	0	0	0	0	0	0	0	0	0	0	0	0	0	0	1.43	0	0	0	0	0.714	0	0	0	0	0	0	0	0	0	0	0	0	0	0	0	0
1	1995	30	11	330	0	0	6.95	1	0	11.5	0	14.3	2.86	0.714	3.574	0	0	0	0	0	0	0	0	0	0	0	0	4.29	0	0	0	0	0.714	0	0	0	0	0	0	0	0	0	0	0	0	0	0	0	0
1	1995	9	12	339	0	0	6.95	1	0	8	19.3	1.43	0	0	0	0	0	0	0	0	0	0	0	0	0	0	0	23.6	0.714	6.43	5	0	1.43	0	0	0	0	0	0	0	0	0	0	0	0	0	0	0	0
1	1995	21	12	351	0	0	6.95	1	0	9	0.714	0	0	0	0	0	0	0	0	0	0	0	0	0	0	0	0	8.57	0	1.43	0.714	0	2.86	0	0	0	1.43	0.714	0	0	2.144	0	0	0	0	0	0.714	0	0
1	1995	29	12	359	0	0	6.95	1	0	8.5	0.714	0	0	0	0	0	0	0	0	0	0	0	0	0	0	0	0	22.1	0	1.43	0	0	0	0	0	0	0	0	0	0	0	0	0	0	0	0	0	0	0
1	1996	12	1	12	0	0	7.2	2	0	9.5	2.14	0	2.86	3.57	6.43	0	0	0	0	0	0	0	0	0	0	0	0	5	0	7.14	1.43	0	0.714	0	0	0	0	0	0	0	0	0	0	0	0	0	0.714	0	0
1	1996	21	1	21	0	0	7.2	2	0	7.5	1.43	0	0	0.714	0.714	0	0	0	0	0	0	0	0	0	0	0	0	30	1.43	13.6	1.43	0	6.43	0	0	0	0	0.714	0	0	0.714	0	0.714	0	0	0	1.43	0	0
1	1996	5	2	35	0	0	7.2	2	0	8	1.43	0	0	0	0	0	0	0	0	0	0	0	0	0	0	0	0	3.57	0	4.29	0	0	0	0	0	0	0	0	0	0	0	0	0	0	0	0	0	0	0
1	1996	16	2	46	0	0	7.2	2	0	7	0.714	0	0	0	0	0	0	0	0	0	0	0	0	0	0	0	0	3.57	0	2.86	0	0	0	0	0	0	0	0	0	0	0	0	0	0	0	0	0	0	0
1	1996	26	2	56	0	0	7.2	2	0	8.5	1.43	0	0	0	0	0	0	0	0	0	0	0	0	0	0	0	0	14.3	0	5	0	0	0.714	0	0	0	0	0	0	0	0	0	0	0.714	0	0	0	0	0
1	1996	11	3	71	0	0	7.2	2	0	7.5	115	0	0	0	0	0	0	0	0	0	0	0	0	0	0	0	0	90	26.4	55.7	6.43	0	8.57	0	0	0	0	0.714	0	0	0.714	0	3.57	0	0	0	2.14	0	0
1	1996	21	3	81	0	0	7.2	2	0	9.5	9.29	0	0	0	0	0	0	0	0	0	0	0	0	0	0	0	0	45	12.9	6.43	4.29	0	7.14	0	0	0	0	0	0	0	0	0	0.714	0	0	0	0.714	0	0
1	1996	1	4	91	0	0	7.2	2	0	11.5	1.43	0	0	0	0	0	0	0	0	0	0	0	0	0	0	0	0	19.3	1.43	2.86	2.14	0	2.14	0	0	0	0	0	0	0	0	0	0	0	0	0	0.714	0	0
1	1996	11	4	101	0	0	7.2	2	0	9.5	15	0	0	0	0	0	0	0	0	0	0	0	0	0	0	0	0	10	7.14	16.4	14.3	0	3.57	0	0	0	0	0	0	0	0	0	0	0	0	0	5	0	0
1	1996	23	4	113	0	0	7.2	2	0	10	276	0	0	0.714	0.714	0	0	0	0	0	0	0	0	0	0	0	0	128	25.7	33.6	31.4	0	3.57	0	0	0	0	0	0	0	0	0	0.714	0.714	0	0	4.29	0	0
1	1996	30	4	120	0	0	7.2	2	0	11	224	0	0	0.714	0.714	0	0	0	0	0	0	0	0	0	0	0	0	44.3	12.1	5	3.57	0	3.57	0	0	0	0	0	0	0	0	0	0	0	0	0	1.43	0	0
1	1996	12	5	132	0	0	7.2	2	0	15	763	0	0	0.714	0.714	0	0	0	0	1.43	0	0	0	0	0.714	0	0	2.14	1.43	3.57	7.14	0	3.57	0	0	0	0	0	0	0	0	0	1.43	0	0	0	1.43	0	0
1	1996	20	5	140	0	0	7.2	2	0	19	4440	0	0	0	0	0	0	0	0	0	0	0	0	0	3.57	0	0	15	5.71	5.71	0	0	8.57	0	0	0	0	0	0	0	0	0	4.29	0.714	0	0	0	0	0
1	1996	31	5	151	0	0	7.2	2	0	19.2	2410	0	0	0	0	0	0	0	0	0	0	0	0	0	14.3	0	0	2.86	2.14	21.4	0	0	1.43	0	0	0	0	0	0	0	0	0	2.86	0	1.43	0	0	0	0
1	1996	10	6	160	0	0	7.2	2	0	19	3520	0	0	0	0	0	0	0	0	0	0	0	0	0	17.1	0	0	4.29	1.43	2.86	0	0	9.29	0	0	0	0	0	0	0	0	0	1.43	0	1.43	0	3.57	0	0
1	1996	21	6	171	0	0	7.2	2	0	21.5	161	0	0	0	0	0	0	0	0.714	0	0	0	0	0	102	0	0	9.29	0.714	4.29	0	0	5.71	0	0	0	0	0	0	0	0	0	1.43	2.86	0	0	2.14	0.714	0
1	1996	1	7	181	0	0	7.2	2	0	22.5	174	1.43	0	1.43	1.43	0	0	0	0	0.714	0	0	0	0	136	0	0	7.86	2.86	31.4	0	0	6.43	0	0	0	0	0	0	0	0	0.714	17.9	2.14	1.43	0	0	0	0
1	1996	10	7	190	0	0	7.2	2	0	27	1.43	2.14	0	0	0	0	0	0	0	0	0	0	0	0	2.14	0	0	0.714	2.14	1.43	0	0	3.57	0	0	0	0	0	0	0	0	0	0.714	0.714	0	0	0.714	0	2.14
1	1996	22	7	202	0	0	7.2	2	0	23	18.6	2.86	1.43	2.14	3.57	0	0	0	0	0	0	0	2.86	9.29	0.714	0.714	0	0.714	2.14	1.43	0	0	0.714	0	0	0	0	0	0	0	0	2.86	2.14	1.43	0		194	0	0
1	1996	31	7	211	0	0	7.2	2	0	26	0	10	183	5.71	188.71	0	0	0	0	0	0	0	2.86	0	0	0	0	0	0.714	0	0	0	0	0	0	0	0	0	0	0	0	0.714	0	0	0	0	57.1	0	0
1	1996	12	8	222	0	0	7.2	2	1	24.5	0	52.9	0	0.714	0.714	0	0	0	0	0	0	0	707	0	0	0	0	0	3.57	1.43	0	0	2.14	0	0	0	0	0	0	0	0	2.14	0	0	0	0	10.7	0.714	0
1	1996	21	8	231	0	0	7.2	2	0	24.5	0.714	4.29	7.14	4.29	11.43	0	0	0	0	0	0	0	124	0	0	0	0	0.714	0.714	0.714	0	0	3.57	0	0	0	0	0	0	0	0	0	0.714	0.714	0	0	8.57	0.714	0
1	1996	2	9	242	0	0	7.2	2	0	25	0	3.57	12.9	3.57	16.47	0	0	0	0	0	0	0	56.4	0	2.14	0	0	0	2.86	2.14	0	0	5.71	0	0	0	0	0	0	0	0	7.14	0	0	0	0	2.86	0.714	0
1	1996	13	9	253	0	0	7.2	2	0	20	0	2.86	0	0	0	0	0	0	0	0	0	0	14.3	0	0	0	0	1.43	5	0.714	0	0	3.57	0	0	0	0	0	0	0	0	0.714	1.43	0	0		2.86	0	0
1	1996	23	9	263	0	0	7.2	2	0	19.5	8.57	7.14	5	8.57	13.57	0	0	0	0	0	0	0	5	0	0.714	0	0	1.43	1.43	3.57	0	0	0.714	0	0	0	0	0	0	0	0	0	2.14	0	0	0	2.14	0	0
1	1996	1	10	271	0	0	7.2	2	0	19.5	15.7	1.43	4.29	10.7	14.99	0	0	0	0	0	0	0	11.4	0	5	2.14	0	2.14	0	2.14	0	0	18.6	0	0	0	0	0	0	0	0	0	1.43	0	0	0	2.14	0	0
1	1996	10	10	280	0	0	7.2	2	0	17.7	2.86	0.714	0	10	10	0	0	0	0	0	0	0	0	0	1.43	0	0	0.714	2.86	7.14	0	0	12.1	0	0	0	0	0	0	0	0	0.714	0.714	0	0	0	15.7	2.14	0
1	1996	21	10	291	0	0	7.2	2	0	19	0	10	0	3.57	3.57	0	0	0	0	0	0	0	0	0	1.43	0	0	0	2.14	1.43	0	0	4.29	0	0	0	0	0	0	0	0	0	0	0	0	0	2.14	0	0
1	1996	1	11	301	0	0	7.2	2	0	16.5	2.14	2.86	5.71	2.14	7.85	0	0	0	0	0	0	0	9.29	0	0	0	0	2.86	4.29	4.29	0	0	2.86	0	0	0	0	0	0	0	0	0	0.714	0	0	0	0.714	0	0
1	1996	11	11	311	0	0	7.2	2	0	14.5	12.1	12.9	0	2.14	2.14	0	0	0	0	3.57	0	0	0	0	0	0	0	2.14	0	0.714	0	0	1.43	0	0	0	0	0	0	0	0	0.714	3.57	0	0	0	1.43	0	0
1	1996	20	11	320	0	0	7.2	2	0	15	17.1	1.43	5.71	2.14	7.85	0	0	0	0	0.714	0	0	1.43	0	0	0	0	3.57	1.43	0	0	0	0.714	0	0	0	0	0	0	0	0	0	0.714	0	0	0	0	0	0
1	1996	29	11	329	0	0	7.2	2	0	13.5	0	0	0	0	0	0	0	0	0	0	0	0	0	0	0	0	0	0	1.43	0.714	0	0	4.29	0	0	0	0	0	0	0	0	0	0	0.714	0	0	0	0	0
1	1996	11	12	341	0	0	7.2	2	0	11	6.43	2.14	2.86	7.86	10.72	0	0	0	0	0	0	0	0	0	0	0	0	2.14	1.43	0.714	0	0	3.57	0	0	0	0	0	0	0	0	0	0.714	0.714	0	0	0	0	0
1	1996	20	12	350	0	0	7.2	2	0	12.5	0.714	0	0	0	0	0	0	0	0	0	0	0	0	0	0	0	0	2.14	0	1.43	0	0	5.71	0.714	0	0	0	0	0	0	0	0	0	0	0	0	9.29	0	0
1	1997	5	1	5	1	1	7.3	2	0	10.5	0.714	0	0	0	0	0	0	0	0	0	0	0	0	0	0	0	0	0	0	0	0	0	0.714	0	0	0	0	0	0	0	0	0	0	0	0	0.2524	3.57	1.43	0
1	1997	13	1	13	0	0	7.3	2	0	8.5	7.86	0	0	1.43	1.43	0	0	0	0	0	0	0	0	0	0	0	0	1.43	0	2.14	2.86	0	1.43	0	0	0	0	0	0	0	0	0	1.43	0	0	0.232	0	0	0
1	1997	20	1	20	0	0	7.3	2	0	9	0.714	0	0	0.714	0.714	0	0	0	0	0	0	0	0	0	0	0	0	0	0	0	0.714	0	0.714	0	0	0	0	0.714	0	0	0.714	0	0	0	0	0.518	1.43	0	0
1	1997	5	2	35	0	0	7.3	2	0	4.5	42.9	0	0	1.43	1.43	0	0	0	0	0	0	0	0	0	0	0	0	22.1	2.86	6.43	7.86	0	12.9	0	0	0	0	0	0	0	0	0	0.714	0	0	1.83	4.29	0	0
1	1997	12	2	42	0	0	7.3	2	0	7	1.43	0	0	0	0	0	0	0	0	0	0	0	0	0	0	0	0	3.57	0.714	2.14	2.14	0	2.14	0.714	0	0	0	0	0	0	0	0	0	0	0	0.6327	0.714	0	0
1	1997	21	2	51	0	0	7.3	2	0	7	64.3	0	0.714	1.43	2.144	0	0	0	0	0	0	0	0	0	0	0	0	40	5	2.86	5.71	0	5.71	0.714	0	0	0	0	0	0	0	0	0	0	0	1.13	2.14	0	0
1	1997	3	3	63	0	0	7.3	2	0	7	2.86	0	0	0	0	0	0	0	0	0	0	0	0	0	0.714	0	0	2.86	2.86	2.14	0	0	0	0	0	0	0	0	0	0.714	0.714	0	0	0	0	1.5548	0	0	0
1	1997	11	3	71	0	0	7.3	2	0	9	79.3	0	0	2.14	2.14	0	0	0	0	0	0	0	0	0	0	0	0	72.1	34.3	44.3	17.1	0	15.7	0	0	0	0	0	0	0	0	0	0.714	0	0	4.5905	5.71	0	0
1	1997	21	3	81	0	0	7.3	2	0	7.5	3.57	0.714	0	0	0	0	0	0	0	0	0	0	0	0	0	0	0	8.57	3.57	4.29	0	0	2.86	0	0	0	0	0	0	0	0	0	0	0	0	1.06	4.29	2.14	0
1	1997	31	3	91	0	0	7.3	2	0	10	2.14	0	0	0	0	0	0	0	0	0	0	0	0	0	0	0	0	1.43	1.43	2.14	0.714	0	0	0	0	0	0	0	0	0	0	0	0	0	0	0.11	0	0.714	0
1	1997	11	4	101	0	0	7.3	2	0	8	8.57	0	0	0	0	0	0	0	0	0	0	0	0	0	17.1	0	0	2.86	0	2.14	0	0	2.86	0	0	0	0	0	0	0	0	0	1.43	0	0	0.2927	12.1	0	0
1	1997	21	4	111	0	0	7.3	2	0	10	5	0	0	0	0	0	0	0	0	0	0	0	0	0	5.71	0	0	4.29	3.57	0.714	0	0	22.1	0	0	0	0	0	0	0	0	0	0	0	0	1.15	0.714	0	0
1	1997	30	4	120	0	0	7.3	2	0	11.5	11.4	0	0	0	0	0	0	0	0.714	0	0	0	0	0	10.7	0	0	3.57	0	0.714	0	0	10	0	0	0	0	0	0	0	0	0	0	0	0	0.613	1.43	0	0
1	1997	11	5	131	0	0	7.3	2	0	15.5	9.29	0	0	0	0	0	0	0	0	0	0	0	0	0	0.714	0	0	3.57	0	1.43	0.714	0	3.57	0	0	0	0	0	0	0	0	0	0	0	0	0.12983	0	0	0
1	1997	21	5	141	0	0	7.3	2	0	17	2040	0	0	0	0	0	0	0	0	0.714	0	0	0	0	0	0	0	2.86	1.43	0	2.14	0	25.7	0	0	0	0	0	0	0	0	0	0	0	0	0.8717	0.714	0	0
1	1997	2	6	152	0	0	7.3	2	0	14.5	169	0	0	0	0	0	0	0	0	0	0	0	0	0	7.14	0	0	1.43	0	0	2.14	0	15.7	0	0	0	0	0	0	0	0	0	0	0.714	0	0.4416	2.86	0	0
1	1997	11	6	161	0	0	7.3	2	0	17.5	92.9	0	0	0	0	0	0	0	0	0	0	0	0	0	9.29	0	0	2.14	0.714	1.43	2.14	0	7.86	0	0	0	0	0	0	0	0	0	1.43	0	1.43	0.3137	0	0	0
1	1997	23	6	173	0	0	7.3	2	0	22	37.9	2.14	0	0	0	0	0	0	0	0	0	0	0	0	151	0	0	5.71	2.14	0.714	0	0	25	0	0	0	0	0	0	0	0	0	5.71	1.43	0	1.998	0	0.714	3.57
1	1997	2	7	182	0	0	7.3	2	0	25	3.57	0.714	0	0	0	0	0	0	0	0	0	0	1.43	0	20.7	0	0	2.14	1.43	0.714	0	0	10	0	0	0	0	0	0	0	0	0	5	0	0	0.31211	0	0.714	0
1	1997	11	7	191	0	0	7.3	2	0	25.5	0	0	0.714	0	0.714	0	0	0	0	0	0	0	0	0	8.57	0	0	0.714	10.7	0.714	0	0	75	0	0	0	0	0	0	0	0	0	0	0.714	0	2.67	0.714	0	0
1	1997	21	7	201	0	0	7.3	2	0	24	2.14	1.43	10.7	5.71	16.41	0	0	0	0	0	0	0	0.714	0	0.714	0	0	0	0	0	0	0	5.71	0	0	0	0	0	0	0	0	0	0	0	0	0.219	2.86	0.714	0
1	1997	1	8	211	0	0	7.3	2	0	25.5	0	92.9	0	2.86	2.86	0	0	0	0	0	0	0	623	0	22.1	0	0	0	0	0.714	0	0	35.7	0	0	0	0	0	0	0	0	0	51.4	1.43	0	12	2.86	1.43	0
1	1997	11	8	221	0	0	7.3	2	0	26	3.57	32.9	4.29	1.43	5.72	0	0	0	0	0	0	0	236	0	1.43	0.714	0	0	0	0	0	0	77.9	0	0	0	0	0	0	0	0	0	5	0	0	5.1	17.9	0.714	0
1	1997	22	8	232	0	0	7.3	2	0	23	6.43	24.3	2.14	5.71	7.85	0	0	0	0	0	0	0	70.7	0	3.57	0.714	4.29	0.714	0	0	0	0	6.43	0	0	0	0	0	0	0	0	0	5.71	0	0	2.602	0.714	0	0
1	1997	1	9	241	0	0	7.3	2	0	22	5.71	2.14	0	0	0	0	0	0	0	0	0	0	52.9	0	1.43	0	1.43	0	0	1.43	0	0	146	0	0	0	0	0	0	0	0	0	0	0	0	5.84257	0	2.14	0
1	1997	11	9	251	0	0	7.3	2	0	20	0	15	0	0	0	0	0	0	0	0	0	0	6.43	0	0.714	0	0	0	0	0	0	0	32.1	0	0	0	0	0	0	0	0	0	1.43	0	0	2.17	0	0.714	0
1	1997	22	9	262	0	0	7.3	2	0	18.5	119	20.7	0	0	0	0	0	0	0	5.71	0	0	13.6	0	115	3.57	6.8	2.14	0	1.43	0	0	49.3	0	0	0	0	0	0	0	0	0	46.4	6.8	0	2.56	5	1.43	0
1	1997	6	10	276	1	1	7.3	2	0	16	0	0	0	0	0	0	0	0	0.714	0	0	0	0	0	0.714	0	0	0	0	0	0	0	1.43	0	0	0	0	0	0	0	0	0	0	0	0	0.459	3.57	0.714	0
1	1997	13	10	283	1	1	7.3	2	0	19	1.43	0	0	0	0	0	0	0	0	0	0	0	2.14	0	0.714	0	0	1.43	4.29	5	0	0	13.6	0	0	0	0	0	0	0	0	0	2.14	0	0	0.844	5	0.714	0
1	1997	22	10	292	0	0	7.3	2	0	16.2	118	0	0	0.714	0.714	0	0	0	0	1.43	0	0	3.57	0	0.714	0.714	0	14.3	0	15.7	7.14	0	45	0	0	0	0	0	0	0	0	0	40.7	1.43	0	7.35	5.71	0	0
1	1997	31	10	301	0	0	7.3	2	0	12.5	38.6	0.714	0	0	0	0	0	0	0	1.43	0	0	0	0	0	0	0	9.29	0	7.14	3.57	0	80	0	0	0	0	0	0	0	0	0	30	0	0	5.68707	3.57	0.714	0
1	1997	11	11	311	0	0	7.3	2	0	14.2	684	0	0	0	0	0	0	0	0	0	0	0	1.43	0	1.43	0	0	10.7	0	15	3.57	0	53.6	0	0	0	0	0	0	0	0	0	7.86	0.714	0	1.62427	0.714	0	0
1	1997	21	11	321	0	0	7.3	2	0	15.5	1.43	0	0	0	0	0	0	0	0	0	0	0	2.14	0	0	0	0	5	0	14.3	2.14	0	11.4	0	0	0	0	0	0	0	0	0	7.86	0	0	1.4814	2.86	0.714	0
1	1997	1	12	331	0	0	7.3	2	0	14	5.71	0.714	0	0	0	0	0	0	0	0	0	0	0.714	0	0	0	0	2.14	0	7.14	23.6	0	11.4	0	0.714	0	0	0	0	0	0	0	3.57	0	0	0.717	0	0	0
1	1997	15	12	345	0	0	7.3	2	0	9.3	2.86	0	0	0	0	0	0	0	0	0	0	0	0	0	0	0	0	2.14	0	8.57	8.57	0	37.9	0	0	0	0	0	0	0	0	0	1.43	0	0	2.544	0	0	0
1	1997	30	12	360	0	0	7.3	2	0	10.5	2.14	0	0	0	0	0	0	0	0	0	0	0	0	0	0	0	0	0.714	0	9.29	1.43	0	0.714	0	0	0	0	0	0	0	0	0	0	0	0	0.404	0	0	0
1	1998	14	1	14	0	0	6.95	1	0	9.5	20.7	0	0	0	0	0	0	0	0	0	0	0	0	0	0	0	0	1.43	0	4.29	7.14	0	3.57	0.714	0	0	0	0	0	0	0	0	0	0	0	0.638	1.43	0	0
1	1998	21	1	21	0	0	6.95	1	0	8.5	7.86	0	0	0	0	0	0	0	0	0	0	0	0	0	0	0	0	1.43	1.43	38.6	15	0	17.1	0	0	0	0	0	0	0	0	0	0	0	0	2.8328	1.43	0	0
1	1998	30	1	30	0	0	6.95	1	0	6.5	12.9	0	0	0	0	0	0	0	0	0	0	0	0	0	0	0	0	9.29	10.7	42.1	12.9	0	38.6	0	0	0	0	0	0	0	0	0	0	0	0	5.49	2.14	0	0
1	1998	11	2	41	0	0	6.95	1	0	6.5	8.57	0	0	0	0	0	0	0	0	0	0	0	0	0	0	0	0	0	4.29	7.86	15	0	1.43	0	0	0	0	0	0	0	0	0	0.714	0	0	0.721	0	0	0
1	1998	23	2	53	0	0	6.95	1	0	8.5	5.71	0	0	0	0	0	0	0	0	0	0	0	0	0	0	0	0	7.86	0.714	22.1	6.43	0	51.4	0	0	0	0	0	0	0	0	0	0	0	0	4.89	7.14	0	0
1	1998	10	3	70	0	0	6.95	1	0	9.5	8.57	0	0	0	0	0	0	0	0	0	0	0	0	0	0	0	0	3.57	1.43	7.14	3.57	0	3.57	0	0	0	0	0	0	0	0	0	0	0	0	0.6283	7.14	0	0
1	1998	23	3	83	0	0	6.95	1	0	6.5	21.4	0	0	0	0	0	0	0	0	0	0	0	0	0	0	0	0	8.57	5	7.14	13.6	0	33.6	0.714	0	0	0	0	0	0	0	0	1.43	0	0	5.7427	6.43	0	0
1	1998	1	4	91	0	0	6.95	1	0	9	150	0	0	0	0	0	0	0	0	0	0	0	0	0	2.14	0	0	14.3	6.43	14.3	74.3	0	25.7	0	0	0	0	0	0	0	0	0	0.714	0	0	2.979	32.9	0.714	0
1	1998	10	4	100	0	0	6.95	1	0	12	521	0	0.714	0	0.714	0	0	0	0	0	0	0	0	0	2.86	0	0	0.714	1.43	2.86	5	0	5	0	0	0	0	0	0	0	0	0	0	0	0	0.518	4.29	0	0
1	1998	20	4	110	0	0	6.95	1	0	9.5	5450	0	0	0	0	0	0	0	0	0	0	0	0	0	8.57	0	0	5	0	0.714	7.86	0	3.57	0	0	0	0	0	0	0	0	0	2.86	0	0	0.215	1.43	0	0
1	1998	29	4	119	0	0	6.95	1	0	12.5	9380	0	0	0.714	0.714	0	0	0	0	0	0	0	0	0	1.43	0	0	3.57	0	0.714	5	0	0.714	0	0	0	0	0	0	0	0	0	0.714	0	0	0.1373	7.86	0	0
1	1998	12	5	132	0	0	6.95	1	0	13.5	6460	0	0	0	0	0	0	0	0	0.714	0	0	0	0	2.86	0	0	7.86	0	13.6	129	0	22.9	0	0	0	0	0	0	0	0	0	2.14	0	0	3.3535	65	0.714	0
1	1998	20	5	140	0	0	6.95	1	0	17	6790	0	0	0	0	0	0	0	0	0	0	0	0	0	104	0	0	10.7	1.43	7.14	2.14	0	0	0	0	0	0	0	0	0	0	0	7.14	0.714	0	1.3897	5.71	0	0
1	1998	1	6	151	0	0	6.95	1	0	20	1780	0	0	0	0	0	0	0	0.714	0	0	0	0	0	69.3	0	0	5.71	0	2.14	0.714	0	5.71	0	0	0	0	0	0	0	0	0.714	1.43	0.714	0	0.641	0.714	0	0.714
1	1998	10	6	160	0	0	6.95	1	0	21.5	1130	0	0	0	0	0	0	0	0	0	0	0	0	0	0	0	0	1.43	0	1.43	0	0	2.14	0	0	0	0	0	0	0	0	0	0	2.86	0	1.87309	0.714	0	0.714
1	1998	22	6	172	0	0	6.95	1	0	22.5	512	0	0	0	0	0	0	0	2.86	0	0	0	0	0	14.3	0	0	1.43	0	1.43	0	0	5	0	0	0	0	0	0	0	0	0	0	2.86	0	4.4	0.714	7.14	0
1	1998	1	7	181	0	0	6.95	1	0	24.5	62.9	0	0	0	0	0	0	0	4.29	0	0	0	0	0	1.43	0	194	0	0	0.714	0	0	0	0	0	0	0	0	0	0	0	0	0	0	0	9	3.57	0	0
1	1998	10	7	190	0	0	6.95	1	0	22	7.86	2.86	4.29	0	4.29	0	0	0	0.714	0	0	0	10	0	49.3	0.714	1.43	0.714	3.57	3.57	1.43	0	110	0	0	0	0	0	0	0	0	19.3	4.29	0	0	6.482	307	6.43	0
1	1998	22	7	202	0	0	6.95	1	0	25	46.4	0	0	0	0	0	0	0	0	0	0	0	4.29	1.43	17.9	7.14	0	12.9	15	3.57	0	0	141	0	0	0	0	0	0	0	0	4.29	38.6	0	0	3.46	52.1	0	0
1	1998	31	7	211	0	0	6.95	1	0	31	0.714	2.14	0	0	0	0	0	0	0	0	0	0	333	2.14	0	0.714	2.86	4.29	24.3	1.43	0	0	52.9	0	0	0	0	0	0	0	0	4.29	0	0	0	9.5532	282	0.714	2.14
1	1998	12	8	222	0	0	6.95	1	0	24	7.86	1.43	0	0	0	0	0	0	0	0	0	0	111	11.4	0	12.1	0	0.714	1.43	0.714	0	0	2.86	0	0	0	0	0	0	0	0	1.43	0	0	0	2.54	13.6	0	0
1	1998	21	8	231	0	0	6.95	1	0	24	1.43	0	0	0	0	0	0	0	0	0	0	0	42.9	3.57	0	2.86	4.29	1.43	7.86	0.714	0	0	12.1	0	0	0	0	0	0	0	0	0	0	0	0	1.6461	271	0	0
1	1998	3	9	243	0	0	6.95	1	0	18.5	113	0.714	5	0.714	5.714	0	0	0	0	0	0	0	32.9	0.714	0.714	0.714	0	0.714	0	1.43	1.43	0	499	0	0	0	0	0	0	0	0	0	70	0	0	11.0313	2.86	6.43	0
1	1998	11	9	251	0	0	6.95	1	0	23.5	47.9	9.29	4.29	5	9.29	0	0	0	0	0	0	0	121	20	8.57	85.7	5.71	0	5	0.714	0	0	20.7	0	0	0	0	0	0	0	0	5.71	0	0	0	4.36583	0.714		0
1	1998	21	9	261	0	0	6.95	1	0	24	19.3	63.6	2.14	6.43	8.57	0	0	0	0	0	0	0	7.14	0	1.43	0.714	0.714	0	1.43	0.714	0	0	17.1	0	0	0	0	0	0	0	0	0.714	1.43	0	0	0.9413	0	0	0
1	1998	2	10	272	0	0	6.95	1	0	19.5	19.3	0	0	0	0	0	0	0	0	0	0	0	85.7	0.714	0.714	1.43	0	0	15.7	0.714	4.29	0	80	0	0	0	0	0	0	0	0	2.14	1.43	0	0.714	7.5501	0	0	0
1	1998	12	10	282	0	0	6.95	1	0	20	0.714	34.3	0	0	0	0	0	0	0	0	0	0	201	0	0	0	0	0	1.43	0	1.43	0	105	0	0	0	0	0	0	0	0	0	4.29	17.1	0	8.7	0	0	0
1	1998	21	10	291	0	0	6.95	1	0	20.5	0	62.9	17.1	16.4	33.5	0	0	0	0	0	0	0	2.86	0	0	0	0	0	0	0	0	0	3.57	0	0	0	0	0	0	0	0	0	0	0	0	0.3639	0	0	0
1	1998	2	11	302	0	0	6.95	1	0	17.5	0	0	0	0	0	0	0	0	0	0	0	0	0	0	0	0	0.714	0.714	0	0.714	0	0	4.29	0	0	0	0	0	0	0	0	0	0	0	0	0.43	4.29	2.14	0
1	1998	11	11	311	0	0	6.95	1	0	11.5	0.714	2.86	7.14	7.14	14.28	0	0	0	0	0	0	0	0.714	0	0	0	0	1.43	0	0	0	0	2.14	0	0	0	0	0	0	0	0	0	0	0	0	0.301	5	0	0
1	1998	20	11	320	0	0	6.95	1	0	10.5	0	0	0	0.714	0.714	0	0	0	0	0	0	0	0	0	0	0	0	15.7	4.29	2.14	7.86	0	80	0	0	0	0	0	0	0	0	0	0.714	0	0	4.4933	1.43	0	0
1	1998	30	11	330	0	0	6.95	1	0	11.5	1.43	0	0	0	0	0	0	0	0	0	0	0	0	0	0	0	0	171	3.57	11.4	35	0	36.4	0.714	0	0	0	0	0	0	0	0	6.43	1.43	0	4.0897	0.714	0	0
1	1998	11	12	341	0	0	6.95	1	0	9.5	3.57	0	0	0	0	0	0	0	1.43	2.86	0	0	0	0	0	0	0	16.4	7.86	52.1	45.7	0	280	0	0	0	0	0	0	0	0	0	0.714	0.714	0	13.37	16.4	1.43	0
1	1998	22	12	352	0	0	6.95	1	0	11.5	0	0	0	0	0	0	0	0	0	0.714	0	0	0	0	0	0	0	10.7	21.4	106	35	0	348	0	0	0	0	0	0	0	0	0	0	0	0	19.5674	15.7	0.714	0
2	1999	2	1	2	0	0	8.18	4	0	9	2.86	0	0	0	0	0	0	0	0	0	0	0	0	0	0	0	0	41.4	69.3	235	274	0	251	0	0	0	0	0	0	0	0	0	12.9	0	0	19.7823	17.1	0	0
2	1999	12	1	12	0	0	8.18	4	0	8.4	0	0	0	0	0	0	0	0	0	0	0	0	0	0	0	0	0	9.29	20.7	169	146	0	68.6	0	0	0	0	0	0	0	0	0	2.86	0	0	9.82	4.29	0	0
2	1999	21	1	21	0	0	8.18	4	0	9	5	0	0	0	0	0	0	0	0	0	0	0	0	0	0	0	0	47.1	82.9	1260	430	0	121	0	0	0	0	0	0	0	0	0	25.7	0	0	44.8	5.71	0	0
2	1999	1	2	31	0	0	8.18	4	0	8.6	0	0	0	0	0	0	0	0	0	0	0	0	0	0	0	0	0	0	0.714	67.1	43.6	0	0	0	0	0	0	0	0	0	0	0	1.43	0	0	2.482	0	0	0
2	1999	9	2	39	1	1	8.18	4	0	9.2	0.714	0	0	0	0	0	0	0	0	0	0	0	0	0	0	0	0	0.714	4.29	45.7	81.4	0	188	0	27.1	0	0	0	0	0	0	0	0	0	0	25.547	0	2.14	0
2	1999	19	2	49	0	0	8.18	4	0	8.5	0	0	0	0	0	0	0	0	0	0	0	0	0	0	0	0	0	6.43	12.1	308	151	0	9.29	0	5.71	0	0	0	0	0	0	0	1.43	0	0	10.0977	7.14	0	0
2	1999	1	3	61	0	0	8.18	4	0	9.7	0	0	0	0	0	0	0	0	0	0	0	0	0	0	0	0	0	10	2.86	794	354	0	80	0.714	0	0	0	0	0	0	0	0	1.43	0.714	0	36.697	14.3	0	0
2	1999	10	3	70	0	0	8.18	4	0	10	1.43	0.714	0	0	0	0	0	0	0	0	0	0	0.714	0	0	0	54.3	67.1	12.9	184	227	0	214	0	0	0	0	0	0	0	0	0	18.6	27.1	0	19.2359	15	0	0
2	1999	19	3	79	0	0	8.18	4	0	9.5	0	0	0	0	0	0	0	0	0	0	0	0	0	0	0	0	0	7.86	5	72.9	204	0	36.4	0	0	0	0	0	0	0	0	0	7.14	0.714	0	4.5937	1.43	0	0
2	1999	1	4	91	0	0	8.18	4	0	12.4	1.43	0	0	0	0	0	0	0	0	0	0	0	0	0	0	0	1030	51.4	0	286	1370	0	1549.3	0	1.43	0	0	0	0	0	0	0	15.7	0	0	36.1	1.43	0	0
2	1999	12	4	102	0	0	8.18	4	0	12	60	0	0	0	0	0	0	0	0	0	0	0	0	0	0	0	4.29	14.3	1.43	13.6	31.4	0	39.3	0	0.714	0	0	0	0	0	0	0	2.86	0	0	1.53	0	0	0
2	1999	21	4	111	0	0	8.18	4	0	13.6	20.7	0	0	0	0	0	0	0	0	0	0	0	0	0	0	0	0.714	2.14	1.43	5.71	6.43	0	57.9	0	0	0	0	0	0	0	0	0	8.57	0	0	1.19	0	0	0
2	1999	30	4	120	0	0	8.18	4	0	14	141	0	0	0	0	0	0	0	0	0	0	0	0	0	0	0	0.714	0	0.714	0	7.86	0	37.13	0	0	0	0	0	0	0	0	0	0	0.714	0	2.338	0	3.57	0
2	1999	11	5	131	0	0	8.18	4	0	14.5	343	0	0	0	0	0	0	0	0	0	0	0	0	0	0.714	0	0.714	36.4	5	4.29	259	0	61.4	0	0	0	0	0	0	0	0	0.714	6.43	0	0	2.547	0	0	0
2	1999	21	5	141	0	0	8.18	4	0	15.2	129	0	0	0	0	0	0	0	0	0	0	0	0	0	27.9	0	0	14.3	2.14	17.1	22.9	0	55.7	0	0.714	0	0	0	0	0	0	0	1.43	0.714	0	4.27	0	0	0
2	1999	1	6	151	0	0	8.18	4	0	16.8	15.7	0	0	0	0	0	0	0	0	0.714	0	0	0	0	87.9	0	2.86	7.14	7.14	16.4	1.43	0	35.7	0	29.3	0	0	0	0	0	0	0	5	0	0	2.07	0	2.86	1.43
2	1999	11	6	161	0	0	8.18	4	0	20.4	0	0	0	0	0	0	0	0	0	0	0	0	0	0	1740	0	0.714	17.1	0	0	7.86	0	72.2	0	0	0	0	0	0	0	0	12.1	413	1.43	0	9.9203	2.86	10	4.29
2	1999	20	6	170	0	0	8.18	4	0	21.6	0	14.3	0	0	0	0	0	0	0	0	0	0	0	0	36.4	0	0	5.71	0	0	0	0	7.85	0	0	0	0	0	0	0	0	3.57	10	3.57	2.14	1.24	0	15	3.57
2	1999	2	7	182	0	0	8.18	4	0	22	1160	15	0	0	0	0	0	0	0	0	0	0	2.14	0	130	0	1.43	0.714	0	2.14	0	0	150	0	0	0	0	0	0	0	0	27.9	130	2.14	0.714	4.509	0.714	5	0.714
2	1999	12	7	192	0	0	8.18	4	0	24.5	62.9	7.14	0	0	0	0	0	0	0.714	0	0	0	164	0	71.4	0	9.29	1.43	0	0	0	0	53	0	0	0	0	0	0	0	0	35.7	32.1	5.71	0.714	5.308	134	4.29	5.71
2	1999	21	7	201	0	0	8.18	4	0	24.5	4.29	22.1	0	0	0	0	0	0	0	0	0.714	0	537	0	22.1	0	2.86	1.43	0	0	0	0	362.9	0	0	0	0	0	0	0	0	39.3	3.57	0	0	10.092	25.7	1.43	3.57
2	1999	2	8	212	0	0	8.18	4	0	26.5	0	10.7	0	0	0	0	0	0	0	0	0	0	271	0	12.1	37.1	0	0	0	0	0	0	329	0	0.714	0	0	0	0	0	0	34.3	0	0.714	0	7.21	37.9	1.43	0.714
2	1999	11	8	221	0	0	8.18	4	0	26.2	0	0.714	0	0	0	0	0	0	0	0	0	0	37.9	0	76.4	0.714	0	0	0	0	0	0	148.1	0	2.86	0	0	0	0	0	0	10	0	0.714	0	2.898	6.43	3.57	0
2	1999	20	8	230	0	0	8.18	4	0	26.6	0	0	0	0	0	0	0	0	10	0	0	0	7.14	0	1.43	45	0	0	0	0	0	0	10.72	0	0.714	0	0	0	0	0	0	1.43	0	0.714	0	0.916	0	0	0
2	1999	30	8	240	0	0	8.18	4	0	22.8	0	0.714	0	0	0	0	0	0	0	0	0	0	868	146	406	646	0	3.57	0	1.43	0	0	366	0	37.9	0	0	0	0	0	0	45	65	0	0	30.7941	356	10	0
2	1999	8	9	248	0	0	8.18	4	0	23.5	0	0	0	0	0	1.43	0	0	0	0	0	0	2020	101	25	618	2.86	5.71	0	3.57	0	0	2609	0	460	0	0	0	0	0	0	49.3	28.6	0	0	119.58	2620	77.9	0
2	1999	20	9	260	0	0	8.18	4	0	22.5	0.714	0	0	0	0	2.14	30	0	0	0	0	0	886	9.29	0.714	305	13.6	15	0	120	0	0	95	0	79.3	0	0	0	0	0	0	247	834	1.43	1.43	38.718	161	10.7	0
2	1999	1	10	271	0	0	8.18	4	0	24.2	0	0	0	0	0	2.86	0	0	0	0	0	0	584	45	25	508	0	2.86	0	0	0	0	461	0	794	0	0	0	0	0	0	153	81.4	0	0	51.76	148	7.86	0
2	1999	11	10	281	0	0	8.18	4	0	21.9	0	0	0	0	0	0	0.714	0	0	0	16.4	0	54.3	0	0	15.7	0.714	0.714	0	45	0	0	345	0	97.9	0	0	0	0	0	0	5	1.43	0	0	13.1	57.9	0.714	0
2	1999	19	10	289	0	0	8.18	4	0	20.4	0	0	0	0	0	0	0.714	0	0.714	0	12.1	0	157	0	0	2.86	0.714	4.29	0	381	0	0	28.6	0	2.86	0	0	0	0	0	0	6.43	102	0	0	17.457	251	1.43	0
2	1999	29	10	299	0	0	8.18	4	0	17.4	0	0	0	0	0	0	0	0	0	0	0	0	0.714	0	0	1.43	0	2.86	0	19.3	0	0	6.43	0	1.43	0	0	0	0	0	0	5.71	2.14	0	0	1.062	13.6	0	0
2	1999	10	11	310	0	0	8.18	4	0	13.4	0	0	0	0	0	0	0	0	0	0	0	0	0.714	0	2.86	0	0	34.3	0	235	13.6	0	17.4	11.4	0.714	0.714	0	0	0	0	0.714	30.7	7.86	0	0	7.1239	38.6	0	0
2	1999	22	11	322	0	0	8.18	4	0	13.5	0.714	0	0	0	0	0	0	0	0	0	0	0	0.714	0	0	0	0	9.29	0	41.4	9.29	0	15.73	0	0.714	0	0	0	0	0	0	0.714	5	0	0	1.2283	0	0	0
2	1999	3	12	333	0	0	8.18	4	0	11.9	0	0	0	0	0	0	0	0	0	0	0	0	0	0	0	0	101	0.714	0	37.9	0	0	7.15	0	0	0	0	0	0	0	0	0	0	0	0	1.15669	6.43	0	0
2	1999	9	12	339	0	0	8.18	4	0	11.8	0	0	0	0	0	0	0	0	0	0	0	0	0	0	0	0	0	4.29	0	85	2.14	0	8.57	0	0	0	0	0	0	0	0	0.714	0	0	0	2.83	1.43	0	0
2	1999	21	12	351	1	1	8.18	4	0	12.1	0	0	0	0	0	0	0	0	0	0	0	0	0	0	0	0	0	0.714	0	19.3	2.86	0	5.71	0	0.714	0	0	0	0	0	0	0	0	0	0	1.0964	10	0.714	0
2	2000	10	1	10	0	0	7.33	2	0	6.5	0.714	0	0	0	0	0	0	0	0	0	0	0	0	0	0	0	0	1.43	0	43.6	30	0	10	0	1.43	0	0	0	0	0	0	0	0	0	0	1.26	5	0	0
2	2000	21	1	21	1	1	7.33	2	0	8.2	0	0	0	0	0	0	0	0	0	0	0	0	0	0	0	0	0.714	0	0	17.9	1.43	0	1.43	0	0	0	0	0	0	0	0	0	0	0	0	0.54	0	0	0
2	2000	4	2	34	0	0	7.33	2	0	8.4	0	0	0	0	0	0	0	0	0	0	0	0	0	0	0	0	0	0.714	0	5	0	0	0	0	0	0	0	0	0	0	0	0	0	0	0	0.141	0	0	0
2	2000	11	2	41	0	0	7.33	2	0	8.2	0	0	0	0	0	0	0	0	0	0	0	0	0	0	0	0	0	1.43	0.714	31.4	7.14	0	0	0	0.714	0	0	0	0	0	0	0	0	0	0	1.21	0.714	0	0
2	2000	21	2	51	1	1	7.33	2	0	8	0	0	0	0	0	0	0	0	0	0	0	0	0	0	0	0	0	1.43	0	5.71	1.43	0	1.43	0	0.714	0	0	0	0	0	0	0	0	0	0	0.237	2.86	0	0
2	2000	3	3	63	0	0	7.33	2	0	8.2	0	0	0	0	0	0	0	0	0	0	0	0	0	0	0	0	0	8.57	0	32.9	8.57	0	2.86	25.7	0	0.714	0	0	0	0	0.714	0	0	0.714	0	1.3906	15.7	0	0
2	2000	13	3	73	1	1	7.33	2	0	7.8	0	0	0	0	0	0	0	0	0	0	0	0	0	0	0	0	1.43	15.7	7.14	30	27.1	0	29.3	0	15	0	0	0	0	0	0	0	0.714	0	0	4.565	66.4	3.57	0
2	2000	21	3	81	0	0	7.33	2	0	8.4	0	0	0	0	0	0	0	0	0	0	0	0	0	0	0	0	239	21.4	0.714	35.7	17.1	0	7.14	0	0.714	0	0	0	0	0	0	0	2.86	0	0	4.3423	10	0	0
2	2000	31	3	91	1	1	7.33	2	0	10.1	4.29	0	0	0	0	0	0	0	0	0	0	0	0	0	0.714	0	531	39.3	11.4	49.3	28.6	0	13.58	0	0	0	0	0	0	0	0	0	3.57	0	0	4.2084	25	0	0
2	2000	11	4	101	1	1	7.33	2	0	10	0	0	0	0	0	0	0	0	0	0	0	0	0	0	0	0	0	1.43	0	0	22.9	0	14.31	0	0	0	0	0	0	0	0	0	0	0	0	0.387	1.43	0	0
2	2000	21	4	111	0	0	7.33	2	0	12.9	0	0	0	0	0	0	0	0	0	0	0	0	0.714	0	0	0	0	2.86	0.714	16.4	0	0	39.29	0	0.714	0	0	0	0	0	0	0	3.57	0	0	0.8023	2.14	0	0
2	2000	3	5	123	0	0	7.33	2	0	14.8	279	1.43	0	0	0	0	0	0	0	0	0	0	0	0	15.7	0	0	6.43	5	89.3	1.43	0	643	0	0	0	0	0	0	0	0	0	40	0	0	9.5738	2.86	0	0
2	2000	12	5	132	0	0	7.33	2	0	14.6	136	0	0	0	0	0	0	0	0	0	0	0	0	0	36.4	0	0	2.14	0.714	3.57	0.714	0	18.56	0	0	0	0	0	0	0	0	0	4.29	0	0	1.26774	5.71	0	0
2	2000	22	5	142	0	0	7.33	2	0	17	125	0	0	0	0	0	0	0	0	0	0	0	0	0	16.4	0	0	9.29	1.43	3.57	0	0	4.29	0	0	0	0	0	0	0	0	0	0	0	0	0.985	32.1	0	0
2	2000	2	6	152	0	0	7.33	2	0	19.9	0	0	0	0	0	0	0	0	0	0	0	0	0	0	42.1	0	0	0	11.4	0	0	0	13.58	0	2.86	0	0	0	0	0	0	0.714	0.714	0	0	1.491	28.6	2.14	2.14
2	2000	9	6	159	0	0	7.33	2	0	20.8	986	0	0	0	0	0	0	0	0	0	0	0	0	0	786	0	0	6.43	12.1	129	2.86	0	85	0	16.4	0	0	0	0	0	0	12.1	2.14	0.714	0	7.3719	0.714	18.6	4.29
2	2000	20	6	170	0	0	7.33	2	0	19.6	4260	0.714	0	0	0	0	0	0	0	0	0	0	0	0.714	16.4	0	0	5	9.29	97.1	0	0	140	0	1.43	0	0	0	0	0	0	0	2.14	1.43	2.14	7.055	0.714	5.71	0
2	2000	30	6	180	0	0	7.33	2	0	21.8	393	1.43	0	0	0	0	0	0	1.43	0	0	0	0.714	0	53.6	0	0	1.43	0	30.7	0	0	3.57	0	2.14	0	0	0	0	0	0	0	18.6	0.714	0	1.31	22.9	0	2.86
2	2000	12	7	192	0	0	7.33	2	0	24.5	85	13.6	0	0	0	0	1.43	0	0	0	0.714	0	5.71	0	16.4	0	0	0.714	2.14	28.6	0	0	20.73	0	0	0	0	0	0	0	0	40.7	4.29	0	0	5.644	309	23.6	0
2	2000	24	7	204	0	0	7.33	2	0	26	0	0	0	0	0	0	0	0	0	0	0.714	0	47.1	0	7.86	11.4	0	0	0	0	0	0	10.72	0	4.28	0	0	0	0	0	0	0.714	1.43	6.43	0	1.66	139	2.86	0
2	2000	31	7	211	0	0	7.33	2	0	26.8	0	1.43	0	0	0	1.43	0	0	0	0	0	0	914	0.714	0	23.6	0	0	4.29	15.7	0	0	28.6	0	4.29	0	0	0	0	0	0	6.43	2.14	2.14	0	27.4	329	2.86	0.714
2	2000	11	8	221	0	0	7.33	2	0	24.5	0.714	2.86	13.6	5	18.6	0	0	0	0	0	0	0	50	0	0.714	9.3	0	0	0	0	0	0	15.7	0	0.714	0	0	0	0	0	0	5.71	2.14	0	0	1.24762	50	1.43	0
2	2000	17	8	227	0	0	7.33	2	0	25	0.714	8.57	10	10.7	20.7	0	0	0	0	0	0.714	0	3.57	0.714	0	2.14	0	0	0	0.714	0	0	4.29	0	0	0	0	0	0	0	0	0	7.14	0	0	0.39228	8.57	10	0
2	2000	21	8	231	0	0	7.33	2	0	26	0.714	5.71	0	0	0	2.86	8.57	0	0	0	0	0	290	57.1	0	110.7	0	0	2.14	2.86	0	0	10.7	0	0.714	0	0	0	0	0	0	5	0.714	0	0	6.26904	25	1.43	0
2	2000	1	9	241	0	0	7.33	2	0	24	0	1.43	0	0	0	3.57	15	0	0	0	0	0	350	0	0	2.8	0.714	0	0	1.43	0	0	23.6	0	0.714	0	0	0	0	0	0	3.57	1.43	0	0	8.997	7.14	3.57	0
2	2000	14	9	254	0	0	7.33	2	0	23.2	0.714	0	0	0	0	0.714	4.29	0	0	0	0	0	3779	18.6	1.43	1657	0.714	3.57	0	19.3	0	0	381	0	27.1	0	0	0	0	0	0	5.71	17.1	0.714	0.714	120.9	127	7.86	0
2	2000	21	9	261	0	0	7.33	2	0	23.6	0	0	0	0	0	5	0	0.714	0	0	0	0	229	39.3	457	0	0	7.14	11.4	214	0	0	476	0	9.29	0	0	0	0	0	0	5	1.43	0	0	24.0784	362	12.1	0
2	2000	2	10	272	0	0	7.33	2	0	21.4	3.57	0	0	0	0	7.14	1.43	0.714	0.714	0	0	0	350	10	2.86	8.57	0	5	8.57	29.3	0	0	49.3	0	6.43	0	0	0	0	0	0	14.3	27.1	0	0	9.9485	101	3.57	0
2	2000	12	10	282	0	1	7.33	2	0	20.5	0	0	0	0	0	0	4.29	0	0	0	5.71	0	27.9	0	0	0	16.4	3.57	5.71	52.1	0	0	156	0	7.14	0	0	0	0	0	0	3.57	21.4	0	0	3.92	104	4.29	0
2	2000	20	10	290	0	0	7.33	2	1	19.2	0.714	0	0	0	0	0.714	5.71	0	0	0	35	0	121	0	0.714	0	0	10.7	9.29	236	0	0	364	0	6.43	0.714	0	0	0	0	0.714	154	154	0	0	27.167	160	70.7	0
2	2000	31	10	301	0	0	7.33	2	0	18.6	0	0	0	0	0	0	2.86	0	0	0	0	0	189	0	111	0.714	0	914	61.4	714	0	0	932	0.714	31.4	0	0	0	0	0	0	154	329	0	0	42.151	42.1	2.14	0
2	2000	13	11	313	0	0	7.33	2	0	17.4	38.6	0	0	0	0	0	2.14	0.714	0	0	0	0	54.3	0	2.86	0	0	8.57	0	786	2.86	0	225	0	7.86	0	2.14	0	0	0	2.14	5.71	47.9	0	0	24.6	50.7	1.43	0
2	2000	21	11	321	0	1	7.33	2	0	16	21.4	0	0	0	0	0	0	1.43	0	0	0	0	1.43	0	0.714	0	0	61.4	0	70	0	0	598	0	0	0	0	0	0	0	0	2.14	15.7	0	0	12.0979	0.714	0	0
2	2000	1	12	331	0	0	7.33	2	0	15.6	164	0	0	0	0	0.714	0.714	0	0	0	0	0	1.43	0	0	0.714	0	30	2.14	536	0	0	179	0	0.714	0	0	0	0	0	0	0	28.6	0	0	251.986	30.7	0	0
2	2000	9	12	339	0	0	7.33	2	0	8.5	743	3.57	0	0	0	0	0	0	1.43	0	0	0	0	0	1.43	0	0	17.9	0	236	7.14	0	0	0	0	0	0	0	0	0	0	0	5.71	0	0	3.93	90.7	0	0
2	2000	19	12	349	0	0	7.33	2	0	12	971	0.714	0	0	0	0	0	0	0	0	0	0	0	0	0	0	0	13.6	0.714	214	5.71	0	7.14	0	1.43	0	0	0	0	0	0	0	4.29	0	0	3.0952	42.9	0	0
2	2000	29	12	359	0	0	7.33	2	0	10.5	879	0	0	0	0	0	0	0	0	0	0	0	0	0	2.14	0	0	4.29	0	40.7	3.57	0	15.7	0	0.714	0	0	0	0	0	0	0.714	0.714	0	0	1.36397	40	0	0
2	2001	10	1	10	0	0	7.89	3	0	11	200	1.43	0	0	0	0	0	0	1.43	0	0	0	0	0	0.714	0	0	15	4.29	49.3	2.14	0	47.1	0	0.714	0.714	0	0.714	0	0	1.428	0.714	0.714	0.714	0	1.98	3.57	0	0
2	2001	22	1	22	0	0	7.89	3	0	8	607	1.43	0	0	0	0	0	0	0	0	0	0	0	0	0	0	3.57	15.7	5	4.29	8.57	0	0.714	0	0.714	0	0	0	0	0	0	0	0	0	0	0.405	55	0	0
2	2001	31	1	31	0	0	7.89	3	0	10.6	1420	0	0	0	0	0	0	0	0	0	0	0	0	0	1.43	0	0.714	10.7	2.14	10	1.43	0	2.14	0	0.714	0	0	0	0	0	0	0	1.43	0	0	0.3	3.57	0	0
2	2001	12	2	42	0	0	7.89	3	0	10	101	0	0	0	0	0	0	0	0	0	0	0	0	0	0.714	0	0	9.29	5	11.4	17.1	0	11.4	0	0	0	0	0	0	0	0	0	0	0	0	0.426	0.714	0	0
2	2001	21	2	51	0	0	7.89	3	0	8.8	99.3	0	0	0	0	0	0	0	0	0	0	0	0	0	0.714	0	0	14.3	2.14	22.9	27.1	0	10	0	7.86	0	0	0	0	0	0	0	0.714	0	0	0.728	6.43	0	0
2	2001	1	3	61	0	1	7.89	3	0	9.4	0	0	0	0	0	0	0	0	0	0	0	0	0	0	0	0	0	37.9	2.14	52.9	46.4	0	90.7	0	11.4	0	0	0	0	0	0	0	0	0	0	2.58	30	0	0
2	2001	11	3	71	0	1	7.89	3	0	9.8	37.9	0	0	0	0	0	0	0	0	0	0	0	0	0	1.43	0	3.57	2.86	2.14	6.43	5.71	0	38.6	0	0.714	0	0	0	0	0	0	0	0	0	0	0.859	8.57	0	0
2	2001	21	3	81	0	1	7.89	3	0	11.6	0	0	0	0	0	0	0	0	0.714	0	0	0	0	0	0	0	0	0	0	1.43	0.714	0	2.86	0	0	0	0	0	0	0	0	0	0	0	0	0.1366	0	0.714	0
2	2001	30	3	90	0	0	7.89	3	0	10.4	222	0.714	0	0	0	0	0	0	0	0	0	0	0	0	7.86	0.714	29.3	79.3	4.29	97.9	28.6	0	82.1	0	2.14	0	0	0	0	0	0	0	1.43	0	0	2.203	4.29	0.714	0
2	2001	11	4	101	0	0	7.89	3	0	11.4	436	0.714	0	0	0	0	0	0	0	0	0	0	0	0	13.6	0	0	6.43	0.714	218	4.29	0	37.9	0	0	0	0	0	0	0	0	0	2.14	0	0	2.14821	10	0	0
2	2001	21	4	111	0	1	7.89	3	0	12.4	371	0	0	0	0	0	0	0	0	0	0	0	0	0	211	0	1.43	1.43	3.57	27.1	7.14	0	146	0	0	0	0	0	0	0	0	0	0	0	0	6.06651	0	0.714	0
2	2001	28	4	118	0	0	7.89	3	0	14.2	60.7	0	0	0	0	0	0	0	0	0	0	0	0	0	2.86	0	0	0	0	2.14	0	0	0	0	0	0	0	0	0	0	0	0	0	0	0	0.06281	0.714	0	0
2	2001	11	5	131	0	0	7.89	3	0	15.2	1110	0	0	0	0	0	0	0	0	0	0	0	0	0	12.9	0	0	5.71	0	4.29	16.4	0	0.714	0	0.714	0	0	0	0	0	0	0	0.714	0	0	0.4963	0	1.43	0
2	2001	21	5	141	0	0	7.89	3	0	15.2	37.1	0	0	0	0	0	0	0	0	0	0	0	0	0	1.43	0	5	3.57	0	17.9	36.4	0	17.1	0	0	0	0	0	0	0	0	0	1.43	0.714	0	1.558	0.714	6.43	0
2	2001	4	6	154	0	0	7.89	3	0	17	40	0	0	0	0	0	0	0	0	0	0.714	0	0	0	51.4	0	0	32.9	0	236	3.57	0	20.7	0	12.1	0	0	0	0	0	0	0	0.714	0	0	3.4181	2.14	2.86	0
2	2001	13	6	163	0	0	7.89	3	0	17.4	4.29	0	0	0	0	0	0	0	0	1.43	0.714	0	0	0	443	0	3.57	986	17.1	607	15.7	0	2200	0	25.7	0	0	0	0	0	0	0	2.14	0	0	31.521	10.7	13.6	0
2	2001	20	6	170	0	0	7.89	3	0	19.8	5.71	0	0	0	0	0	0	0	0	0	0	0	0	0	567	0	33.6	371	0	1200	1.43	0	3600	0	139	0	0	0	0	0	0	0	4.29	5.71	0	72.5382	286	46.4	8.57
2	2001	29	6	179	0	0	7.89	3	0	22	4.29	2.14	0	0	0	0	0	0	0	1.43	9.29	0	0	0	182	0	0	4.29	4.29	28.6	2.86	0	25	0	2.14	0	0	0	0	0	0	0	0	5	0.714	2.35	307	13.6	0.714
2	2001	10	7	190	0	0	7.89	3	0	23.2	250	20.7	2.86	7.14	10	0	0	0	0	0	0	0	0	0	5.71	1.43	0	0.714	4.29	22.1	0	0	15	0	0	0	0	0	0	0	0	0.714	0	1.43	0	1.763	164	17.1	2.14
2	2001	10	8	220	0	0	7.89	3	0	27.4	11.4	5	139	31.4	170.4	2.14	0	0	0	0	0	0	2820	0	0	0	0	0	0	0	0	0	9.29	0	5	0	0	0	0	0	0	2.14	0	0	0.714	74.72	4.29	2.86	0
2	2001	20	8	230	0	0	7.89	3	0	28.4	17.1	0	2.86	3.57	6.43	1.43	1.43	0.714	0	0	0	0	479	7.86	0	236	0	0	0	0	0	0	10.7	0	1.43	0	0	0	0	0	0	0	0	0	0	14.29	1.43	0.714	0
2	2001	30	8	240	0	0	7.89	3	0	24.2	1.43	0	0	0	0	0	0	0	0	0	0	0	124	0.714	0	7.86	0	0.714	0	0	0	0	45.7	0	0	0	0	0	0	0	0	0	0	0	0	5.23	2.86	0	0
2	2001	10	9	250	0	0	7.89	3	0	25	0.714	0	0	0	0	0	0	0.714	0	0.714	0	0	5540	0	1.43	1110	0	2.86	0	0	0	0	900	0	20.7	0	0	0.714	0	0	0.714	0	0	0	0	96.4041	28.6	56.4	0
2	2001	20	9	260	0	0	7.89	3	0	23.2	0	0	0	0	0	5.71	13.6	0	0	0	229	0	50	0	0	0.714	0	0.714	1.43	0.714	0	0	557	0	77.9	0	0	0	0	0	0	307	10	0	0	36.327	14.3	114	0
2	2001	1	10	271	0	0	7.89	3	0	21.6	0	2.86	0	0	0	0	21.4	0	0	0	146	0	486	0	0	0	0	2.14	0	111	0	0	28.6	0	5	0	0	0	0	0	0	443	211	0	0	35.67	6.43	0.714	0
2	2001	10	10	280	0	0	7.89	3	0	21.7	0	7.14	0	0	0	0	20.7	0	1.43	0	22.9	0	82.9	0	0	1.43	0	0	0	22.9	0	0	22.9	0	10	0	0	0	0	0	0	40	27.9	0	0	4.9768	30.7	5	0
2	2001	20	10	290	0	0	7.89	3	0	21.8	12.9	0	0	0	0	10	41.4	0	0	0	329	0	129	0	0.714	0	0	2.86	0	221	0	0	35	0	7.14	0	0	0	0	0	0	293	50	0	0	13.6894	33.6	0.714	0
2	2001	9	11	309	0	0	7.89	3	0	16.2	0.714	0	0	0	0	0.714	0	0	0	0	1.43	0	2.86	0	0	0	0.714	44.3	14.3	86.4	12.1	0	3.57	0	1.43	3.57	0	0	0	0	3.57	10.7	17.9	0	0	3.32135	0.714	0	0
2	2001	21	11	321	0	0	7.89	3	0	13.2	0	0.714	0	0	0	0.714	0	0	0	0	0	0	7.86	0	0	0	0	150	10.7	168	11.4	0	32.9	0	0.714	4.29	0	0	0	0	4.29	2.14	2.14	0	0	4.6077	0	0	0
2	2001	30	11	330	0	0	7.89	3	0	12	0	0	0	0	0	0	0	0	0	0	0	0	0	0	0	0	0	1.43	3.57	28.6	0.714	0	6.43	0	0	0	0	0	0	0	0	0	0.714	0	0	0.53097	0	0	0
2	2001	11	12	341	0	0	7.89	3	0	12	0	0	0	0	0	0	0	0	0	0	7.86	0	1.43	0	0	0	0	0	2.86	1.43	2.86	0	5.71	0	0	0	0	0	0	0	0	0	0	0	0	0.23493	3.57	0.714	0
2	2001	25	12	355	0	0	7.89	3	0	11.5	0	0	0	0	0	0	0	0	0	0	0	0	0.714	0	0	0	0	0	0	10	4.29	0	7.14	0	0	0	0	0	0	0	0	0	1.43	0.714	0	0.7632	2.86	0	0
2	2002	4	1	4	0	0	7.25	2	0	10.8	0	0	0	0	0	0	0	0	0	0	0	0	0	0	0	0	0	5	0	264	28.6	0	44.3	0	0	0.714	0	0	0	0	0.714	0	0	0	0.714	4.498	7.86	0	0
2	2002	11	1	11	0	0	7.25	2	0	9	2.14	0	0	0	0	0	0	0	0	0	0	0	0	0	0.714	0	0	2.14	20	17.1	28.6	0	12.9	0	0	0.714	0	0	0	0	0.714	0	0	0	0	0.81054	1.43	0	0
2	2002	21	1	21	0	0	7.25	2	0	8.6	0.714	0	0	0	0	0	0	0	0	0	0	0	0	0	0	0	0	6.43	19.3	110	10	0	42.9	1.43	0	0	0	0	0	0	0	0	0	0	0	2.6989	0	0	0
2	2002	4	2	34	0	0	7.25	2	0	8.8	0	0	0	0	0	0	0	0	0	0	0	0	0	0	0	0	0	6.43	48.6	25	8.57	0	42.9	0	0	0	0	0	0	0	0	0	0	0	0	0.73847	4.29	0	0
2	2002	11	2	41	0	0	7.25	2	0	8.8	0	0	0	0	0	0	0	0	0	0	0	13.6	0	0	0	0	0	7.86	5.71	6.43	2.86	0	32.1	0	0	0	0	0	0	0	0	0	1.43	0	0	0.70268	15	0	0
2	2002	22	2	52	0	0	7.25	2	0	8.8	3.57	0	0	0	0	0	0	0	0	0	0	3.57	0	0	0	0	0	16.4	0	4.29	11.4	0	12.1	0	0	0	0	0	0	0	0	0	1.43	0	0	0.296	2.14	0	0
2	2002	1	3	61	0	0	7.25	2	0	8.6	2.14	0	0	0	0	0	0	0	0	0	0	229	0	0	1.43	0	0	107	17.1	27.1	50	0	66.4	0	0	0.714	0	0	0	0	0.714	0	0	0	0	2.66454	27.9	0	0
2	2002	11	3	71	0	0	7.25	2	0	8.5	9.29	0	0	0	0	0	0	0	0	0	0	16.4	0	0	0	0	0	35.7	29.3	12.1	20	0	24.3	0	0	0	0	0	0	0	0	0	2.86	0	0	1.41	22.9	0	0
2	2002	21	3	81	0	0	7.25	2	0	9	34.3	0	0	0	0	0	0	0	0	0	0	36.4	0	0	0	0	0	15.7	49.3	1.43	50	0	7.86	0	0	0	0	0	0	0	0	0	0.714	0	0	3.38	3.57	0	0
2	2002	1	4	91	0	0	7.25	2	0	8.6	7.14	0	0	0	0	0	0	0	0	0	0	225	0	0	0	2.14	0	25.7	12.1	7.14	5	0	164	0	0	0	0	0	0	0	0	0	1.43	0	0	6.66	1.43	0	0
2	2002	12	4	102	0	0	7.25	2	0	9.6	7.86	0	0	0	0	0	0	0	0	0	0	168	0	0	0	0.714	0	47.1	36.4	21.4	25	0	457	0	0	0	0	0	0	0	0	0	7.14	0	0	15.51	18.6	0	0
2	2002	22	4	112	0	0	7.25	2	1	10.8	107	0	0	0	0	0	0	0	0	0	0	47.9	0	0	0	0.714	0	47.9	132	28.6	39.3	0	871	0	0	0	0	0	0	0	0	0	2.14	0	0	15.58	5	0.714	0
2	2002	30	4	120	0	0	7.25	2	0	12.2	12.9	0	0	0	0	0	0	0	0	0	0	12.1	0	0	0	0	0	3.57	0.714	2.14	5	0	19.3	0	0	0	0	0	0	0	0	0	1.43	0	0	0.282	2.14	0	0
2	2002	13	5	133	0	0	7.25	2	0	15.2	214	0	0	0	0	0	0	0	0	0	0	0	0.714	0	0	0	0	29.3	11.4	57.1	16.4	0	125	0	37.9	0	0	0	0	0	0	0	15.7	0	0	3.2138	16.4	0.714	0
2	2002	31	5	151	0	0	7.25	2	0	18.2	257	0	0	0	0	0	0	0	0	0	0	2.86	0	0	3.57	0	0	40.7	57.9	11.4	18.6	0	118	0	3.57	0	0	0	0	0	0	0.714	3.57	0	0	6.03	8.57	21.4	0
2	2002	10	6	160	0	0	7.25	2	0	20.8	2.14	0	0	0	0	0	0	0	0	0	0	0	0	0	69.3	0	0.714	15	2.86	0.714	2.86	0	11.4	0	2.86	0	0	0	0	0	0	10.7	0.714	0.714	0	1.553	5.71	6.43	0
2	2002	21	6	171	0	0	7.25	2	1	17.6	1650	0	0	0	0	0	0	0	0	0	0	0	0	0	68.6	0	0	32.9	5	24.3	19.3	0	89.3	0	1.43	0.714	0	0	0	0	0.714	6.43	57.9	2.14	0	3.737	4.29	5	0.714
2	2002	3	7	183	0	0	7.25	2	0	25	64.3	0	0	0	0	0	0.714	0	0	0	0	0	0	0	82.1	0	1.43	7.86	10.7	9.29	0	0	18.6	0	55.7	0	0	0	0	0	0	10	10	0.714	0	3.1518	113	66.4	0.714
2	2002	11	7	191	0	0	7.25	2	0	26.8	16.4	0.714	0	0	0	0	0	0	0	0	0	0	8.57	0	12.9	0	0	0	10	0	0	0	25.7	0	12.9	0	0	0	0	0	0	0.714	0	0	0	1.081	232	25.7	0
2	2002	22	7	202	0	0	7.25	2	0	27.2	14.3	3.57	7.14	0.714	7.854	0	0	0	0	0	0	0	1.43	0	0.714	0	0	0	7.86	0	0	0	76.4	0	1.43	0	0	0	0	0	0	3.57	0	0.714	0	1.622	21.4	8.57	0
2	2002	30	7	210	0	0	7.25	2	0	27.3	5.71	75	18.6	0.714	19.314	0	0	0	0	0.714	0	0	4.29	0	0	0	0.714	0	5	0	0	0	50	0	0.714	0	0	0	0	0	0	0	0	0	0	0.842	15	3.57	0
2	2002	12	8	222	0	0	7.25	2	0	25.8	0	11.4	15.7	32.9	48.6	0	0	0	1.43	0	2.86	0	11.4	0	0	0	0.714	0	0.714	0	0	0	5	0	2.14	0	0	0	0	0	0	2.86	0	2.86	0	3.19	11.4	0.714	0
2	2002	21	8	231	0	0	7.25	2	0	25.4	1.43	37.9	20.7	7.14	27.84	0	0	0	0	0.714	0.714	0	19.3	0	2.14	2.14	0	0	3.57	0	0	0	23.6	0	0	0	0	0	0	0	0	2.14	0	2.14	0	2.7987	5	3.57	0
2	2002	2	9	242	0	0	7.25	2	0	25.2	0	3.57	0	0	0	0	82.1	4.29	0	0	0	0	1680	0	75	75	0	0	50	0	0	0	1810	0	52.1	0	0	0	0	0	0	17.9	1.43	0	1.43	46.1945	50	22.1	0
2	2002	11	9	251	0	0	7.25	2	0	25.4	0	0	0.714	0	0.714	0	5		0	0	0	0	286	0	19.3	243	0.714	5	121	0	0	0	731	0	10.7	0	0	0	0	0	0	6.43	1.43	0	0	21.71	154	85.7	0
2	2002	19	9	259	0	0	7.25	2	0	24.2	0	0	0	0	0	2.14	2.86	0	0	0	0	0	1210	0.714	9.29	5.71	3.57	2.14	15.7	0	0	0	281	0	35.7	0	0	0	0	0	0	38.6	15	0	0	26.1487	43.6	4.29	0
2	2002	20	9	260	0	0	7.25	2	0	24	0	0	0	0	0	0	0	0	0	0	0	0	486	0	0.714	1.43	0.714	0	111	0	0	0	810	0	93.6	0	0	0	0	0	0	3.57	10.7	0	0	25.87	4.29	0.714	0
2	2002	1	10	271	0	0	7.25	2	0	22.8	0	0	0	0	0	0.714	11.4	0	0	0	36.4	0	38.6	0.714	46.4	8.57	0	11.4	221	28.6	0	0	390	0	60	0	0	0	0	0	0	82.1	132	0	0	16.87	471	32.1	0
2	2002	10	10	280	0	0	7.25	2	0	22	0	0	0	0	0	0	0	0	9	0	74.3	0	379	0	50	2.86	0	5	57.1	11.4	0	0	176	0	27.1	0	0	0	0	0	0	4.29	65	0	0	10.9	429	17.1	0
2	2002	21	10	291	0	0	7.25	2	0	21.4	0	0	0	0	0	0	1.43	0	0	0	8.57	0	104	0	22.1	9.29	2.14	2.86	8.57	1.43	0	0	36.4	0	201	0	0	0	0	0	0	7.14	5.71	0	0	7.54	72.9	0.714	0
2	2002	29	10	299	0	0	7.25	2	0	19	0	0	0	0	0	0	0	0	0	0	3.57	0	107	0	0	0.714	5	11.4	2.86	64.3	0	0	354	0	55	0	0	0.714	0	0	0.714	1.43	0.714	0	0	15.7641	37.1	1.43	0
2	2002	11	11	311	0	0	7.25	2	0	17.2	0	0	0	0	0	0	0	0	0	0	0	0	19.3	0	0	0	0	15.7	2.86	20	0	0	17.1	0	7.14	2.86	2.14	0	0	0	5	0	0	0	0	2.3005	7.86	0.714	0
2	2002	21	11	321	0	0	7.25	2	0	15.4	0	0	0	0	0	0	0	0	0	0	2.86	0	0.714	0	2.14	0	0	22.1	18.6	55.7	1.43	0	2.86	0	3.57	1.43	0	0	0	0	1.43	2.14	15.7	0	0	1.65	7.14	0.714	0
2	2002	3	12	333	0	0	7.25	2	1	13.8	2.86	0	0	0	0	0	0	0	0	0	0	0	17.1	0	1.43	3.57	0	1.43	19.3	164	10	0	21.4	0	6.43	0	0	0	0	1.43	1.43	2.14	0.714	0	0	4.67762	8.57	0.714	0
2	2002	15	12	345	0	0	7.25	2	1	12.4	5	0	0	0	0	0	0	0	0	0	0	0	0	0	0	3.57	0	20.7	108	414	10.7	0	4.29	0	0	5.71	0.714	0	0	0	6.424	4.29	2.86	0	0	6.394	27.9	0	0
2	2002	25	12	355	0	0	7.25	2	0	10.6	2.86	0	0	0	0	0	0	0	0	0	0	0	0.714	0	0.714	0	0	3.57	22.1	364	1.43	0	118	0	0.714	0	0	0	0	0	0	1.43	2.14	0	0	10.7904	12.9	0	0
3	2003	10	1	10	0	0	6.91	1	0	10	0.833	0	0	0	0	0	0	0	0	0	0	5	0	0	0	0	0	25	27.5	500	15.8	0	263	0	0	0	0	0	0	0	0	0	5	0	0	10.5	30.8	0	0
3	2003	20	1	20	0	0	6.91	1	0	9.2	0.833	0	0	0	0	0	0	0	0	0	0	2.5	0	0	0.833	0	0	5.83	0	45.8	2.5	0	51.7	0	0	0.833	0	0	0	0	0.833	0	0	0	0	1.91	9.17	0	0
3	2003	30	1	30	0	1	6.91	1	0	8.8	0	0	0	0	0	0	0	0	0	0	0	0	0	0	0	0	0	2.5	0	18.3	0.833	0	15.8	0	0	0	0	0	0	0.833	0.833	0	0	0	0	2.1646	32.5	0.833	0
3	2003	10	2	40	0	1	6.91	1	0	9	0	0	0	0	0	0	0.833	0	0	0	0	0	0	0	0	0	0.833	5.83	0.833	4.17	0	0	0.833	0	0	0	0	0	0	0	0	0	0	0	0	0.234	4.17	0	0
3	2003	3	3	63	0	0	6.91	1	0	8.4	16.7	0	0	0	0	0	0	0	0	0	0	5	0	0	0	0	0	78.3	35.8	103	92.5	0	377	0.833	1.67	0	0	0	0	0	0	1.67	1.67	0	0	14.1	44.2	0.833	0
3	2003	10	3	70	0	0	6.91	1	0	8.4	15.8	0	0	0	0	0	0	0	0	0	1.67	19.2	0	0	0	0	5	250	59.2	76.7	81.7	0	168	1.67	0	3.33	0.833	0.833	0	0	4.996	0	14.2	0	0	8.1055	292	0.833	0
3	2003	21	3	81	0	0	6.91	1	0	8	19.2	0	0	0	0	0	0	0	0	0	0.833	25.8	0	0	0	0	0.833	81.7	20.8	26.7	4.17	0	72.5	10	0.833	12.5	5	3.33	0	0	20.83	0	0	0	0	9.151	115	0.833	0
3	2003	31	3	91	0	0	6.91	1	0	8	3.33	0	0	0	0	0	0	0	0	0	0	15.8	0	0	0	0	2.5	308	204	53.3	0	0	1460	24.2	0	7.5	0	0	0	0	7.5	0	24.2	0	0	47.4	55	0	0
3	2003	10	4	100	0	0	6.91	1	0	8	0.833	0	0	0	0	0	0	0	0	0	0	13.3	0	0	0	0	5	9.17	2.5	3.33	0.833	0	4.17	2.5	0	0	0	0	0	0	0	0	0.833	0	0	0.6485	6.67	0	0
3	2003	21	4	111	0	0	6.91	1	0	8.6	73.3	0	0	0	0	0	0	0	0	0	0	417	0	0	0	0	6.67	450	81.7	25	33.3	0	117	0	0	0.833	0	0	0	0	0.833	0	11.7	0	0	5.16414	90	0	0
3	2003	29	4	119	0	0	6.91	1	0	10	87.5	0	0	0	0	0	0	0	0	0	0	267	0	0	0	0	6.67	104	12.5	5.83	0.833	0	12.5	0	0	0	0	0	0	0	0	0	4.17	0	0	1.16	12.5	0	0
3	2003	8	5	128	0	0	6.91	1	0	11.4	213	0	0	0	0	0	0	0	0	0	0	3470	0	0	0	0	21.7	20.8	45.8	3.33	5	0	23.3	0	0	0	0	0	0	0	0	0	33.3	0	0	9.19593	5	2.5	0
3	2003	21	5	141	0	0	6.91	1	0	18.4	6170	0.833	0	0	0	0	0	0	0	0	0	2890	0	0	20.8	0	3.33	292	20	5	0.833	0	32.5	0.833	6.67	0	0	0	0	0	0	0	375	0	0	14.42	60	308	0
3	2003	4	6	154	0	0	6.91	1	0	17.3	11.7	0	0	0	0	0	0	0	0	0	0	617	0	0	102	0	0	9.17	15.8	1.67	6.67	0	38.3	0	0.833	0	0	0	0	0	0	0	2.5	0	0	3.9965	90	5	0
3	2003	10	6	160	0	0	6.91	1	0	18.8	16.7	0	0	0	0	0	0	0	0	0	0	1650	0	0	138	0	0	12.5	13.3	4.17	2.5	0	20.8	0	0	0	0	0	0	0	0	2.5	6.67	0.833	0.833	7.0457	20	5	0
3	2003	20	6	170	0	0	6.91	1	0	16.4	13.3	0	0	0	0	0	0	0	0	0	0	2220	0	0	283	0	1.67	16.7	30.8	2.5	4.17	0	59.2	0	62.5	0.833	0	0	0	0	0.833	2.5	4.17	0	0	8.9765	300	4.17	0.833
3	2003	30	6	180	0	0	6.91	1	0	21.4	8.33	0	0	0	0	0	0	0	0	0	0	7.5	2.5	0	47.5	0	0	10	32.5	3.33	1.67	0	43.3	0	13.3	0	0	0	0	0	0	5	6.67	1.67	0	2.0605	3.33	11.7	0.833
3	2003	11	7	191	0	0	6.91	1	0	21.4	0.833	0	0	0	0	0	0	0	0	0	0	0	0	1.67	6.67	0	0	0.833	2.5	0.833	5	0	24.2	0	3.33	0	0	0	0	0	0	0	0	0	0.833	1.3546	6.67	3.33	0
3	2003	22	7	202	0	0	6.91	1	0	22.4	85	12.5	0	0	0	0	0	0	0	0	0	2.5	19.2	0.833	4.17	15.8	0	0	20.8	20	0	0	95	0	3.33	0	0	0	0	0	0	0	19.2	0	0.833	2.3333	41.7	1.67	0
3	2003	30	7	210	0	0	6.91	1	0	24.4	0	0.833	0	0	0	0	0	0	0	0	0.833	0.833	21.7	0	1.67	0	0.833	1.67	3.33	0	0	0	4.17	0	11.7	0	0	0	0	0	0	0.833	0.833	0	0	0.769	66.7	8.33	0
3	2003	11	8	221	0	0	6.91	1	0	25.8	1.67	4.17	0	0	0	0	23.3	2.5	0	0	0	0	750	0	0	0.833	0	1.67	7.5	0.833	0	0	9.17	0	4.17	0	0	0	0	0	0	7.5	0	0.833	0	12.6789	65	2.5	0
3	2003	21	8	231	0	0	6.91	1	0	24.4	2.5	0	0	0	0	11.7	5	0	0	0	0	0.833	633	358	0	1340	0	0.833	25.8	0.833	0	0	50	0	1.67	0	0	0	0	0	0	7.5	18.3	0	0.833	38.9085	100	10.8	0
3	2003	2	9	242	0	0	6.91	1	0	25	1.67	0.833	0	0	0	0	0.833	0	0	0	0	2.5	633	15.8	14.2	8.33	0	3.33	22.5	0	0	0	125	0	105	0	0	0	0	0	0	26.7	15	0	0	19.603	2410	975	0
3	2003	11	9	251	0	0	6.91	1	0	21.1	1.67	0	0	0	0	0	0.833	0	0	0	0	1.67	16.7	0.833	5	1.67	0	0.833	8.33	0	0	0	15.8	0	3.33	0	0	0	0	0	0	1.67	13.3	0	0	0.7991	0	6.67	0
3	2003	22	9	262	0	0	6.91	1	0	21.2	0	0.833	0	0	0	0	0.833	0	0	0	0	5.83	47.5	0	10	4.17	0	3.33	34.2	0	0	0	96.7	0.833	25.8	0	0	0	0	0	0	3.33	5	0	0	4.9289	567	10	0
3	2003	1	10	271	0	0	6.91	1	0	21.4	26.7	1.67	0	0	0	0	6.67	0	0	0	35	0.833	102	0	11.7	0.833	0	5	14.2	1.67	0	0	124	0	98.3	0	0	0	0	0	0	26.7	70.8	0	0	8.6861	200	25.8	0
3	2003	13	10	283	0	0	6.91	1	0	20.2	48.3	1.67	0	0	0	2.5	15	0	0	0	12.5	0	132	1.67	31.7	6.67	0	11.7	22.5	2.5	0	0	53.3	0	88.3	0.833	0	0	0	0	0.833	15	19.2	0	0	6.918	50.8	4.17	0
3	2003	20	10	290	0	0	6.91	1	0	16.6	5	0	0	0	0	0	0	0	0	0	0	4.17	11.7	0	1.67	0	0	0.833	9.17	3.33	0.833	0	33.3	0	5.83	0	0.833	0	0	0	0.833	5.83	19.2	1.67	0	1.92723	43.3	9.17	0
3	2003	30	10	300	0	0	6.91	1	0	15.2	10	0	0	0	0	0	0.833	0	0	0	0	1.67	5	0	1.67	0	0	7.5	15	4.17	2.5	0	240	0	14.2	1.67	0	0	0	0	1.67	4.17	5	2.5	0	8.25	17.5	4.17	0
3	2003	11	11	311	0	0	6.91	1	1	12.6	3.33	0	0	0	0	0	0.833	0	0	0	0	2.5	0	0	1.67	0	0	39.2	13.3	45	0	0	86.7	0	3.33	7.5	0	0	0	0	7.5	0.833	3.33	0	0.833	3.5293	5	9.17	0
3	2003	21	11	321	0	1	6.91	1	0	13.8	1.67	0	0	0	0	0	0.833	0	0	0	0	0	0	0	1.67	0	0.833	8.33	8.33	22.5	0	0	49.2	28.3	0.833	2.5	1.67	1.67	0	0	5.84	1.67	0	0	0	5.51	342	0	0
3	2003	1	12	331	0	0	6.91	1	0	13	0	0	0	0	0	0	0	0	0	0	0	0.833	0	0	1.67	0	0	29.2	30	23.3	3.33	0	16.7	3.33	0.833	0	0	0	0	0	0	0	3.33	0.833	0	1.39	10	0	0
3	2003	11	12	341	0	0	6.91	1	0	10.8	0	0	0	0	0	0	0	0	0	0	0	0	0	0	0	0	0	26.7	28.3	17.5	7.5	0	47.5	1.67	0	1.67	0	0	0	0	1.67	0.833	0	0	0	1.31759	6.67	0	0
3	2003	29	12	359	0	0	6.91	1	0	10.2	0	0	0	0	0	0	0	0	0	0	0	0	0	0	0	0	0	50	182	74.2	25	0	77.5	0.833	0	0	0	0	0	0.833	0.833	0	0	0	0	3.45792	1.67	0	0
3	2004	11	1	11	0	0	7.48	3	0	9.2	0	0	0	0	0	0	0	0	0	0	0	0	0	0	0	0	0	4.17	0	6.67	0.833	0	1.67	0	0	0	0	0	0	0	0	0	0	0	0	0.142	0	0	0
3	2004	12	1	12	0	0	7.48	3	0	9.8	0	0	0	0	0	0	0	0	0	0	0	1.67	0	0	0	1.67	0	21.7	80	50	15	0	42.5	0.833	0	0	0	0	0	0.833	0.833	0	0.833	0	0	2.49	5	0	0
3	2004	21	1	21	0	0	7.48	3	0	9.1	0	0	0	0	0	0	0	0	0	0	0.833	0	0	0	0	0	0	0.833	0	5	0	0	5.83	0	0	0	0	0	0	0	0	0	0	0	0	1.8228	102	3.33	0
3	2004	30	1	30	0	0	7.48	3	0	9.8	0	0	0	0	0	0	0	0	0	0	0	0	0	0	0	0	0	1.67	0	5.83	0.833	0	8.33	0	0	0	0	0	0	0	0	0	0	0	0	0.5005	4.17	0	0
3	2004	10	2	40	0	1	7.48	3	0	9.2	0	0	0	0	0	0	0	0	0	0	0	0.833	0	0	0	0	0	0	0	2.5	0	0	0.833	0	0	0	0	0	0	0	0	0	0	0	0	0.0957	0.833	0	0
3	2004	20	2	50	0	0	7.48	3	0	8.6	0	0	0	0	0	0	0	0	0	0	0	5	0	0	0	0	0	7.5	16.7	15.8	10.8	0	16.7	0	0	0	0	0	0	0	0	0	0	0	0	1.0391	0.833	0	0
3	2004	1	3	61	0	1	7.48	3	0	9	0.833	0	0	0	0	0	0	0	0	0	0	2.5	0	0	0	0	0	7.5	16.7	55	8.33	0	41.7	0	0	0	0	0	0	0	0	0	0	0	0	3.09	19.2	0	0
3	2004	10	3	70	0	0	7.48	3	0	8.6	0	0	0	0	0	0	0	0	0	0	0	1.67	0	0	0	0	0	9.17	16.7	36.7	10.8	0	138	0	0	0	0	0	0	0	0	0.833	0.833	0	0	6.49	5.83	0	0
3	2004	22	3	82	0	0	7.48	3	0	9.2	0.833	0	0	0	0	0	0	0	0	0	0	0	0	0	0	0	1.67	5.83	0.833	9.17	3.33	0	35.8	11.7	0	0	0	0	0	0	0	0	0	0.833	0	2.9094	1.67	0	0
3	2004	30	3	90	0	0	7.48	3	0	9.7	12.5	0	0	0	0	0	0	0	0	0	0	3.33	0	0	0	0	0	17.5	17.5	24.2	0.833	0	60	0	0	0	0	0	0	0	0	0	8.33	0	0	1.93416	10	0	0
3	2004	12	4	102	0	0	7.48	3	0	11.6	35.8	0	0	0	0	0	0	0	0	0	0	2.5	0	0	0	0	0	5	0	0.833	2.5	0	5.83	0	0	0	0	0	0	0	0	0	0.833	0	0	0.189	2.5	0	0
3	2004	20	4	110	0	0	7.48	3	0	10.4	148	0.833	0	0	0	0	0	0	0	0	0	36.7	0	0	0	0	0	16.7	0.833	0.833	0	0	658	0	0	0	0	0	0	0	0	0	20	0	0	5.61	2.5	0.833	0
3	2004	30	4	120	0	0	7.48	3	0	13	162	0	0	0	0	0	0	0	0	0	0	32.5	0	0	0	0	0	1.67	2.5	7.5	1.67	0	36.7	0	0	0	0	0	0	0	0	0	17.5	0	0	1.1244	0.833	0	0
3	2004	11	5	131	0	0	7.48	3	0	17	107	0.833	0	0	0	0	0	0	0	0	1.67	26.7	0	0	3.34	0	0	34.2	5	8.33	0.833	0	43.3	0	7.5	0	0	0	0	0	0	0	10	0	0	1.9772	67.5	4.17	0
3	2004	21	5	141	0	0	7.48	3	0	14.2	1.67	0	0	0	0	0	0	0	0	0.833	0	0	0	0	0	0	0	4.17	1.67	0	0	0	0.833	0	0	0	0	0	0	0	0	0	0	0	0	0.2435	3.33	0	0
3	2004	31	5	151	0	0	7.48	3	0	16.6	5.83	0	0	0	0	0	0	0	0	0	0	5.83	0	0	45.8	0	0	20	4.17	2.5	1.67	0	6.67	0	5.83	0	0	0	0	0	0	0	0.833	0.833	0	1.13723	3.17	16.7	0
3	2004	11	6	161	0	0	7.48	3	0	14.8	10.8	0	0	0	0	0	0	0	0	0	0	34.2	0	0	0	0	0	65	4.17	0.833	1.67	0	3.33	0	0.833	0	0	0	0	0	0	0	0	0.833	0	1.0816	24.2	10	0
3	2004	21	6	171	1	1	7.48	3	0	21.4	38.3	0	0	0	0	0	0	0	0	0	0	0	0	0	1150	0	0	0	9.17	2.5	0.833	0	49.2	0	22.5	0	0	0	0	0	0	0.833	0	1.67	0	5.59652	5	5	4.17
3	2004	1	7	181	0	1	7.48	3	0	21.2	15.8	0	0	0	0	0	0	0	0	0	0	2.5	0	0	317	0	0	11.7	16.7	5	0	0	341	0	58.3	0	0	0	0	0	0	1.67	15.8	1.67	0	6.2048	70	22.5	1.67
3	2004	12	7	192	0	0	7.48	3	0	21	60	0	0	0	0	0	0	0	0	0	0	20	3.33	0	130	0	0	6.67	45.8	78.3	0	0	25	0.833	5	0.833	0	0	0	0	0.833	2.5	6.67	7.5	0	5.65	175	6.67	0
3	2004	21	7	201	0	0	7.48	3	0	20.2	529	0	0	0	0	0	0	0	0	0	0	8.33	7.5	0	25	0	0	5	5.83	62.5	0	0	86.7	0	12.5	0	0	0	0	0	0	4.17	15.8	3.33	0	4.968	187	157	0
3	2004	30	7	210	0	0	7.48	3	0	25	0.833	4.17	0	0	0	0	0	0	0	0	0	0	41.7	0	18.3	0	0	3.33	10	1.67	0	0	15.8	0	6.67	0	0	0	0	0	0	11.7	4.17	1.67	0.833	2.5196	133	10	0.833
3	2004	11	8	221	0	0	7.48	3	0	25.4	2.5	18.3	1.67	0	1.67	0	0	0	0	0	0	0	475	0	1.67	0.833	0	1.67	5	0	0	0	159	0	217	0	0	0	0	0	0	25	4.17	0.833	0.833	12.482	87.5	22.5	0.833
3	2004	23	8	233	0	0	7.48	3	0	23.8	91.7	3.33	0.833	0	0.833	0	0	0	0	0	0	0	179	0	0	0.833	0	3.33	5	0	0	0	102	0	39.2	0	0	0	0	0	0	35	10	0	0	4.791	36.7	5.83	0
3	2004	1	9	241	0	0	7.48	3	0	25.6	1.67	8.33	0.833	0	0.833	0	0	0	0	0	0	2.5	3090	2.5	9.17	212	0	16.7	66.7	0	0	0	202	0	20.8	0	0	0	0	0	0	91.7	22.5	0.833	0.833	61.27	26.7	3.33	0
3	2004	10	9	250	0	0	7.48	3	0	21.8	2.5	69.2	0	0	0	0	0	0	0	0	0	3.33	708	4.17	2.5	87.5	0	3.33	10	0	0	0	45	0	10	0	0	0	0	0	0	5	15	0	0	14.032	10.8	1.67	0
3	2004	20	9	260	0	0	7.48	3	0	23.8	0	27.5	0	0	0	0	0	0	0	0	0	1.67	150	0	0	0.833	0	1.67	4.17	1.67	0	0	13.3	0	39.2	0	0	0	0	0	0	12.5	4.17	0	0	5.822	17.5	1.67	0
3	2004	1	10	271	0	1	7.48	3	0	23.8	0	0.833	0	0.833	0.833	0	0	0	0	0	0	0	66.7	0	0	0	0.833	1.67	13.3	0	0	0	513	0	5.83	0	0	0	0	0	0	0	0	0	0	11.731	10	2.5	0
3	2004	11	10	281	1	1	7.48	3	0	20	0	0	0	0	0	0.833	3.33	0	0	0	0	0	20	0	0.833	5	0	0	10	7.5	0	0	369	0	10	0	0	0	0	0	0	1.67	0	0	0	8.11	83.3	2.5	0
3	2004	22	10	292	0	0	7.48	3	0	15.6	0.833	0	0	0	0	0	1.67	0	0	0	0	0	1.67	0	0	0.833	0	19.2	0	0.833	0	0	247	0	0	0	0	0	0	0	0	0	0.833	0	0	4.456	1.67	0	0
3	2004	2	11	302	0	0	7.48	3	0	17.4	0.833	0	0	0	0	0	6.67	0	0	0	0	2.5	0	0	7.5	0	0	13.3	35.8	26.7	0	0	203	0	8.33	0	0	0	0	0	0	0	26.7	0	0	2.91	2.5	0	0
3	2004	10	11	310	0	0	7.48	3	0	17.4	0	0	0	0	0	0	2.5	0.833	0	0	2.5	8.34	0	0	0.833	0	0	18.3	10.8	25.8	0	0	11.7	0	0	0.833	0	0	0	0	0.833	2.5	11.7	0	0	0.824	0	0	0
3	2004	22	11	322	0	0	7.48	3	1	15	0.833	0	0	0	0	0	0.833	0	0	0	0	1.67	0	0	0.833	0	0	2.5	8.33	26.7	0	0	47.5	0	0.833	0	0	0	0	0	0	1.67	0	0	0	0.782	0	0	0
3	2004	29	11	329	0	0	7.48	3	0	12.4	14.2	0	0	0	0	0	0	0	0	0	0	0	0	0	0	0.833	0	31.7	5.83	24.2	0	0	56.7	0	0	4.17	0	0	0	0	4.17	0	0.833	0	0	1.981	0.833	0	0
3	2004	10	12	340	0	0	7.48	3	0	11.4	0.833	0	0	0	0	0	0	0	0	0	0	3.33	0	0	0	0	0	8.33	9.17	44.2	2.5	0	67.5	1.67	0	0	0	0	0	0	0	0	0.833	0	0	1.58487	0	0	0
3	2004	20	12	350	0	0	7.48	3	0	10.6	0.833	0	0	0	0	0	0	0	0	0	0	0	0	0	0	0	0	4.17	0.833	5	2.5	0	1.67	0	0	0	0	0	0	0	0	0	0	0	0	0.119	0.833	0	0
3	2004	30	12	360	0	0	7.48	3	0	10	0	0	0	0	0	0	0	0	0	0	0	3.33	0	0	0	0	0	0.833	6.67	22.5	3.33	0	0.833	0	0	0	0	0	0	0	0	0	0	0	0	0.319	0	0	0
3	2005	1	2	31	0	1	7.84	3	0	9.2	0	0	0	0	0	0	0	0	0	0	0	0	0	0	0	0	0	2.5	4.17	4.17	1.67	0	0	0	0	0.833	0	0	0	0	0.833	0	0	0	0	-1.152	16.7	0.833	0
3	2005	11	2	41	0	0	7.84	3	0	7.6	9.17	0	0	0	0	0	0	0	0	0	0	0	0	0	0	0	0	4.17	5	81.7	3.33	0	5.83	0	0	0.833	0	0	0	0	0.833	0	3.33	0	0	1.24	3.33	0	0
3	2005	21	2	51	0	0	7.84	3	0	9.2	1.67	0	0	0	0	0	0	0	0	0	0	0.833	0	0	0	0	0	3.33	12.5	11.7	0	0	5	0	0	0	0	0	0	0	0	0	0.833	0	0	0.278	0	0	0
3	2005	5	3	65	0	0	7.84	3	0	9	15.8	0	0	0	0	0	0	0	0	0	0	2.5	0	0	0	0	0	15	18.3	20.8	10	0	12.5	2.5	0	0	0	0	0	0	0	0	0	0	0	1.03	0.833	0	0
3	2005	11	3	71	0	0	7.84	3	0	8.6	0.833	0	0	0	0	0	0	0	0	0	0	9.17	0	0	0	0	0	5.83	3.33	5	0.833	0	1.67	0	0	0	0	0	0	0	0	0	0	0	0	0.146	0	0	0
3	2005	21	3	81	1	1	7.84	3	0	5.4	1.67	0	0	0	0	0	0	0	0	0	0	1.67	0	0	0	0	0	4.17	0	2.5	0.833	0	22.5	0	0	0	0	0	0	0	0	0	0	0	0	1.53759	1.67	0	0
3	2005	31	3	91	0	0	7.84	3	0	7.8	32.5	0	0	0	0	0	0	0	0	0	0	562	0	0	0	0	0	26.7	0.833	1.67	7.5	0	46.7	0	0	0	0	0	0	0	0	0	0	0	0	2.79336	6.67	0	0
3	2005	11	4	101	0	0	7.84	3	0	9.8	575	0	0	0	0	0	0	0	0	0	0	97.5	0	0	0	0	0	22.5	9.17	4.17	1.67	0	12.5	3.33	0	0	0	0	0	0	0	0	4.17	0	0	0.961	1.67	0	0
3	2005	21	4	111	0	1	7.84	3	0	12	49.2	0	0	0	0	0	0	0	0	0	0	6.67	0	0	0	0	0	0	3.33	0	0	0	14.2	0	0	0	0	0	0	0	0	0	2.5	0	0	0.5898	1.67	0	0
3	2005	29	4	119	0	1	7.84	3	0	12.2	185	1.67	0	0	0	0	0	0	0	0	0	0	0	0	0	0	0	0.833	0	2.5	0	0	0	0	0	0	0	0	0	0	0	0	1.67	0	0	0.10121	3.33	0	0
3	2005	12	5	132	0	0	7.84	3	0	15.4	317	5	0	0	0	0	0	0	0	0	0	24.2	0	0	0.833	0	0	0.833	18.3	6.67	0.833	0	167	0	0	0	0	0	0	0	0	0	5.83	0	0	1.78	1.67	0.833	0
3	2005	23	5	143	0	0	7.84	3	0	19.8	60.8	0.833	0	0	0	0	0	0	0	0	0	14.2	0	0	25.8	0	0	5	14.2	8.33	0	0	34.2	0	0	0	0	0	0	0	0	0	0	0	0	0.627	2.5	0.833	0
3	2005	30	5	150	0	0	7.84	3	0	21.2	60	3.33	0	0	0	0	0	0	0	0	0	16.7	0	0	47.5	0	0	1.67	8.33	30.8	0	0	20	0	2.5	0	0	0	0	0	0	3.33	0	0	0	0.85244	36.7	0.833	0
3	2005	1	6	151	0	0	7.84	3	0	21	2170	0	0	0	0	0	0	0	0	0	0	0	0	0	0	0	0	3.33	1.67	6.67	0	0	1.67	0.833	0	0	0	0	0	0	0	0	0	3.33	0	1.65614	1.67	1.67	1.67
3	2005	10	6	160	0	0	7.84	3	0	20	250	1.67	0	0	0	0	0	0	0	0	0	0	0	0	200	0	0	3.33	3.33	0	0	0	5.83	0	0	0	0	0	0	0	0	1.67	5.83	0.833	0	1.0679	26.7	19.2	0
3	2005	21	6	171	0	1	7.84	3	0	20.6	45.8	0	0	0	0	0	0	0	0	0	0	0	0	0	3.33	0	0	0	4.17	0.833	0	0	3.33	0	0.833	0	0	0	0	0	0	0.833	2.5	0	0	0.0628	0	0	0
3	2005	1	7	181	0	1	7.84	3	0	21.4	867	20.8	26.7	1.67	28.37	0	0	0	0	0	0	0	0.833	0	54.2	0	0	3.33	1.67	6.67	0	0	6.67	0	0.833	0	0	0	0	0	0	13.3	10.8	2.5	0	1.348	9.17	28.3	22.5
3	2005	11	7	191	0	0	7.84	3	0	24.4	183	3.33	0	0	0	0	0	0	0	0	0	0	8.33	0	50	0	0	7.5	2.5	13.3	0	0	12.5	0	0	0	0	0	0	0	0	0	1.67	2.5	0.833	2.7418	10	5.83	0.833
3	2005	20	7	200	0	0	7.84	3	0	23.8	358	28.3	1.67	0	1.67	0	0	0	0	0	0	0	275	0	46.7	0	0	6.67	14.2	4.17	0	0	66.7	0.833	2.5	0	0	0	0	0	0	7.5	0.833	0	0	4.8583	0.833	5	0.833
3	2005	1	8	211	0	0	7.84	3	0	24.5	1.67	0.833	0	0	0	0	11.7	0.833	0	0	0	0	3770	1.67	0.833	19.2	0	5	0.833	0	0	0	11.7	0	0	0	0	0	0	0	0	6.67	1.67	3.33	0	66.9	6.67	2.5	0
3	2005	10	8	220	0	0	7.84	3	0	24.2	2.5	1.67	1.67	0.833	2.503	0	25	0	0	0	0	0	4520	0	1.67	129	0	9.17	121	0	0	0	343	0	22.5	0	0	0	0.833	0	0.833	54.2	95.8	0	0	98.387	568	367	0
3	2005	22	8	232	0	0	7.84	3	1	24.4	0	0	0	0	0	0	58.3	0.833	0	0	4.17	0	267	0.833	0	0.833	0	2.5	152	1.67	0	0	30	0.833	1390	0	0	0	0	0	0	135	0.833	0	0	32.61	196	26.7	0
3	2005	31	8	241	0	0	7.84	3	0	25.6	0	0	0	0	0	0.833	3.33	0	0	0	6.67	0	850	1.67	2.5	175	0	9.17	13.3	0	0	0	31.7	0	140	0	0	0	0	0	0	45.8	0.833	0	0	25.6396	188	0	0
3	2005	12	9	252	0	0	7.84	3	0	23.8	0	0	0	0	0	0	2.5	0	0	0	5.83	0	2.5	0	0	0.833	0	2.5	6.67	0.833	0	0	71.7	0	34.2	0	0	0	0	0	0	10.8	5	0	0	2.812	188	16.7	0
3	2005	20	9	260	0	0	7.84	3	0	24	0	0	0	0	0	0	63.3	0	0	0	28.3	0	367	0.833	6.67	12.5	0	19.2	162	11.7	0	0	39.2	1.67	356	0	0	0	0	0	0	39.2	13.3	0	0	23.2036	317	85.8	0
3	2005	3	10	273	0	0	7.84	3	0	23.2	5.83	0	0	0	0	0	0	0	0	0	0	0	0.833	0	15	1.67	0	0	4.17	4.17	0	0	1.67	0.833	16.7	0	0	0	0	0	0	6.67	0.833	0	0	0.9728	5.83	0.833	0
3	2005	10	10	280	0	0	7.84	3	0	21	0	0	0	0	0	0.833	5	0	0	0	4.17	0	10	0	4.17	0	0	3.33	30.8	17.5	0.833	0	6.67	0.833	15.8	0	0	0	0	0	0	60.8	15	0	0	1.7273	76.7	4.17	0
3	2005	21	10	291	0	0	7.84	3	0	19	3.33	0	0	0	0	0	5	0	0	0	0	0	10.8	0	8.33	0	0	5.83	15.8	25	0	0	11.7	0	1.67	0	0	0	0	0	0	1.67	40	0	0	2.4919	31.7	0	0
3	2005	31	10	301	0	0	7.84	3	1	16.4	20.8	0	0	0	0	0	2.5	0	0	0	0	0	0.833	0	30	0	0	26.7	25.8	30	0.833	0	83.3	0	4.17	0	0	0	0	0	0	6.67	10.8	0	0	2.3166	14.2	9.17	0
3	2005	10	11	310	0	0	7.84	3	0	17.2	3.33	0	0	0	0	0	0	0	0	0	1.67	0	0.833	0	0.833	0	0	31.7	37.5	274	0	0	154	0	1.67	0	0	0	0	0	0	5.83	6.67	0	0	6.6684	22.5	1.67	0
3	2005	22	11	322	0	0	7.84	3	0	15.2	11.7	0	0	0	0	0	0	0	0	0	0	0	0.833	0	0	0	0	16.7	10	40	0.833	0	22.5	0	0.833	0	0	0	0	0	0	4.17	4.17	0	0	1.2599	1.67	0	0
3	2005	30	11	330	0	0	7.84	3	0	14.8	1.67	0	0	0	0	0	0	0	0	0	0	0	1.67	0	8.33	0	0	0.833	1.67	24.2	0	0	7.5	0.833	0	0	0	0	0	0	0	1.67	2.5	0	0	0.445	1.67	0	0
3	2005	12	12	342	0	0	7.84	3	1	12.8	3.33	0	0	0	0	0	0	0	0	0	0	0	0	0	6.67	0	0	5.83	3.33	57.5	5	0	22.5	3.33	0	0	0	0	0	0	0	1.67	0	0	0	2.2	2.5	0	0
3	2005	20	12	350	0	0	7.84	3	0	12.2	15	0	0	0	0	0	0	0	0	0	0	0	0	0	5	0	0	3.33	2.5	8.33	0	0	3.33	0	0	0	0	0	0	0	0	2.5	1.67	0	0	0.25483	1.67	0	0
3	2005	30	12	360	0	0	7.84	3	0	10.6	2.5	0	0	0	0	0	0	0	0	0	0	0	0	0	5	0	0	4.17	0.833	3.33	0	0	6.67	0	0	0	0	0	0	0	0	0	0	0	0	0.1611	0	0	0
3	2006	11	1	11	0	0	7.15	2	0	9.8	3.33	0	0	0	0	0	0	0	0	0	0	0	0.833	0	0	0	0	3.33	4.17	7.5	2.5	0	7.5	1.67	0	0	0.833	0	0	0	0.833	0	0.833	0	0	0.444	7.5	0.833	0
3	2006	30	1	30	0	1	7.15	2	0	7.4	0	0	0	0	0	0	0	0	0	0	0	0	0	0	0	0	0	0	0	0	0.833	0	0.833	0.833	0	0	0	0	0	0	0	0	0	0	0	0.14882	15	5	0
3	2006	13	2	43	0	0	7.15	2	0	7.6	0	0	0	0	0	0	0	0	0	0	0	0	0	0	0	0	0	0	0	0.833	0	0	0	1.67	0	0	0	0	0	0	0	0	0	0	0	0.284	7.5	0.833	0
3	2006	20	2	50	0	0	7.15	2	0	7.4	10.8	0	0	0	0	0	0	0	0	0	0	0	10	0.833	0	0.833	0	4.17	0	0	0.833	0	10	0	0	0	0	0	0	0	0	0.833	1.67	0	0	0.665	0.833	0	0
3	2006	1	3	61	0	0	7.15	2	0	7.8	1.67	0	0	0	0	0	0	0	0	0	0	0	0.833	0	0	0	0	0	0	5	0	0	3.33	0	0	0	0	0	0	0	0	0	0	0	0	0.165	3.33	0	0
3	2006	10	3	70	0	0	7.15	2	0	9	13.3	0	0	0	0	0	0	0	0	0	0	0	11.7	0	0	0	0	7.5	0	0.833	0	0	16.7	0.833	0	0	0	0	0	0	0	0	0	0	0	0.828	0.833	0	0
3	2006	20	3	80	0	0	7.15	2	0	8.4	18.3	0	0	0	0	0	0	0	0	0	0	3.33	10.8	0	0	0	0	26.7	16.7	6.67	4.17	0	40.8	0.833	0	0.833	0	0	0	0	0.833	0	0	0	0	1.39171	5	0	0
3	2006	30	3	90	0	0	7.15	2	0	8.4	1.67	0	0	0	0	0	0	0	0	0	0	0	2.5	0	0	0	0	5	0.833	1.67	0	0	12.5	0	0	0	0	0	0	0	0	0	0	0	0	0.49	3.33	0.833	0
3	2006	10	4	100	0	0	7.15	2	0	10.6	3.33	0	0	0	0	0	0	0	0	0	0	0.833	0	0	0	0	0.833	2.5	0.833	0	0	0	3.33	0	0	0	0	0	0	0	0	0	0	0	0	0.19	0	0	0
3	2006	20	4	110	0	0	7.15	2	0	12	7.5	0	0	0	0	0	0	0	0	0	0	1.67	0.833	0	0	0	0	2.5	2.5	0	0	0	2.5	0	0	0	0	0	0	0	0	0.833	0	0	0	0.22	0.833	0	0
3	2006	11	5	131	0	0	7.15	2	0	12.8	20	0	0	0	0	0	0	0	0	0	0	0	0.833	0	0	0	0	2.5	0.833	0	0	0	4.17	0	0	0	0	0	0	0	0	0	0.833	0	0	0.06911	0	0	0
3	2006	23	5	143	0	0	7.15	2	0	16.4	1780	7.5	0	0	0	0	0	0	0	0	0	0	2.5	0	237	0.833	0	21.7	138	11.7	1.67	0	129	0	7.5	0	0	0	0	0	0	0.833	188	0	0	5.92664	21.7	8.33	0
3	2006	30	5	150	0	0	7.15	2	0	18.5	175	0	0	0	0	0	0	0	0	0	0	0	0	0.833	383	0	0	44.2	26.7	17.5	3.33	0	190	1.67	17.5	0.833	0.833	0	0	0	1.666	1.67	8.33	1.67	0	11.1726	13.3	171	0
3	2006	3	6	153	0	0	7.15	2	1	10.8	16.7	0	0	0	0	0	0	0	0	0	0	0.833	2.5	0	0	0	0	5	2.5	0.833	0	0	12.5	0	0	0	0	0	0	0	0	0	0	0	0	0.32248	11.7	1.67	0
3	2006	13	6	163	0	0	7.15	2	0	19.8	5790	0	0	0	0	0	0	0	0	0	0	0	3.33	0	2490	0	0	129	26.7	167	1.67	0	288	0	0.833	0	0	0	0	0	0	11.7	12.5	0.833	0	14.241	533	16.7	0.833
3	2006	20	6	170	0	0	7.15	2	0	21	2520	5.83	0	0	0	0	0	0	0	0	0	0	0	0	1400	0	0	325	13.3	17.5	0.833	0	589	0	5.83	0	0	0	0	0	0	22.5	41.7	1.67	2.5	19.6532	3.33	19.2	0
3	2006	30	6	180	0	0	7.15	2	0	23.4	225	0	0	0	0	0	0	0	0	0	0.833	0	1.67	0	1770	0	0	175	64.2	262	0	0	45.8	0	95.8	0	0	0	0	0	0	5	100	0.833	0	11.862	4.17	625	5.83
3	2006	11	7	191	0	0	7.15	2	0	24	5	52.5	0	0	0	0	0	0	0	0	0.833	0	5	0	250	0	0	11.7	52.5	3.33	0	0	169	0.833	44.2	0	0	0	0	0	0	5.83	48.3	2.5	0	6.13211	4.17	20.8	0
3	2006	21	7	201	0	0	7.15	2	0	22.8	358	19.2	7.5	1.67	9.17	0	0	0	0	0	4.17	0	30	0	2.5	0	0	1.67	17.5	56.7	0	0	639	0	3.33	0	0	0	0	0	0	18.3	10.8	1.67	0	13.9974	4.17	12.5	0
3	2006	1	8	211	0	0	7.15	2	0	24	6.67	55.8	7.5	6.67	14.17	0	5.83	2.5	0	0	0	0	1560	0.833	0	0	0	8.33	9.17	2.5	0	0	26.7	0	6.67	0	0	0	0	0	0	17.5	3.33	0	1.67	18.191	8.33	6.67	0
3	2006	10	8	220	0	0	7.15	2	0	26.4	7.5	0	1.67	0	1.67	0	0	0	0	0	0	0	533	0	1.67	2.5	0	179	17.5	83.3	0	0	421	0	39.2	0	0	0	0	0	0	5.83	15	0	0.833	18.006	20	73.3	0
3	2006	21	8	231	0	0	7.15	2	0	26.5	3.33	0	0	0	0	0	2.5	0	0	0	0	0	442	14.2	1.67	7.5	0	30.8	21.7	9.17	0	0	113	0	58.3	0.834	0	0	0	0.833	1.667	20	10.8	0	0.833	10.9484	198	77.5	0
3	2006	1	9	241	0	0	7.15	2	0	23	15	0.833	0	0	0	0	0	0	0	0	0	0	83.3	1.67	3.33	1.67	0	17.5	350	89.2	0	0	2600	0.833	165	0.833	0	0	0	1.67	2.503	16.7	41.7	0	0	60.51	700	0	0
3	2006	11	9	251	0	0	7.15	2	0	23	3.33	0.833	0	0	0	3.33	9.17	0	0	0	15.8	0	5290	317	3.33	275	0.833	5	250	2.5	0	0	1160	0	30	0	0	0	0	0	0	16.63	521	0	4.17	172.718	458	146	0
3	2006	21	9	261	0	0	7.15	2	0	22.1	1.67	0.833	0	0	0	1.67	8.33	0	0	0	87.5	0	56.7	0	0.833	58.3	1.67	4.17	22.5	11.7	0	0	387	0.833	82.5	0	0	0	0	0	0	48.3	258	0	0.833	20.321	175	7.5	0
3	2006	3	10	273	0	0	7.15	2	0	22	5.83	0	0	0	0	0	0.833	0	0	0	87.5	0	162	0	0.833	0.833	0	0.833	5.83	100	0	0	69.2	0	296	0	0	0	0	0	0	204	21.7	0	0	20.0067	112	3.33	0
3	2006	10	10	280	0	0	7.15	2	1	21.6	27.5	0	0	0	0	0	19.2	0	0	0	10	0	22.5	0	0	0	0	1.67	20.8	21.7	0	0	30.8	0	212	0	0	0	0	0	0	175	25	0	0	9.6094	10.8	7.5	0
3	2006	21	10	291	0	0	7.15	2	0	20	33.3	1.67	0	0	0	0.833	3.33	0	0	0	17.5	0	43.3	1.67	0	0.833	0	4.17	22.5	28.3	0.833	0	20.8	0	34.2	0	0	0	0	0	0	16.7	5	0	0	2.9496	27.5	0.833	0
3	2006	1	11	301	0	0	7.15	2	0	19.2	6.67	0	0	0	0	0	11.7	0	0	0	11.7	0	108	0.833	3.33	2.5	0	12.5	18.3	69.2	0	0	102	0	178	0.833	0	0	0	0	0.833	25	2.5	0	0	14.0957	17.5	5.83	0
3	2006	14	11	314	1	1	7.15	2	0	15.2	0	0	0	0	0	0	0	0	0	0	0	0	3.34	0	0	0	0	9.17	1.67	3.33	0	0	10	0	4.17	0.833	0	0	0	0	0.833	0	0	0	0	0.7073	3.33	0	0
3	2006	20	11	320	0	0	7.15	2	0	14.2	13.3	0	0	0	0	0	4.17	0	0	0	0.833	0	0.833	0	1.67	0.833	0	417	15.8	508	1.67	0	64.2	1.67	10.8	17.5	7.5	0	0	0	25	3.33	5	0	0	14.6972	5.83	1.67	0
3	2006	1	12	331	0	0	7.15	2	0	13	15	0	0	0	0	0	0.833	0	0	0	0	0	8.33	0	5	0.833	0	70	56.8	517	50	0	32.5	9.17	5	7.5	0.834	0	0	0	8.334	4.17	47.5	0	0	9.44	2.5	0	0
3	2006	12	12	342	0	0	7.15	2	0	11.6	5.83	0	0	0	0	0	0.833	0	0	0	0	0	0	0	0.833	0	0	59.2	31.7	475	11.7	0	8.33	3.33	0	4.17	0	0.833	0	0	5.003	0.833	20.8	0	0	7.06872	4.17	0	0
3	2006	20	12	350	0	0	7.15	2	0	11.2	4.17	0	0	0	0	0	0	0	0	0	0	0	0.833	0	0.833	0	0	29.2	13.3	66.7	8.33	0	7.5	10	0	0.833	0	0	0	0	0.833	0	5	0	0	1.6298	2.5	0.833	0
3	2007	11	1	11	0	1	7.88	3	0	9.6	1.67	0	0	0	0	0	0	0	0	0	0	0	0	0	1.67	0	0	9.17	5	14.2	3.33	0	12.5	1.67	0	0	0	0	0	0	0	0	0	0	0	0.44123	0	0	0
3	2007	24	1	24	0	0	7.88	3	0	9	2.5	0	0	0	0	0	0	0	0	0	0	0	1.67	0	0	0	0	0	0	0.833	0.833	0	4.17	0	0	0	0	0	0	0	0	0	0	0	0	0.182	1.67	0	0
3	2007	5	2	35	0	0	7.88	3	0	8.4	0	0	0	0	0	0	0	0	0	0	0	0	1.67	0	0	0	0	1.67	0.833	1.67	0.833	0	5	0.833	0	0	0	0	0	0	0	0	0	0	0	0.138	3.33	0	0
3	2007	12	2	42	0	0	7.88	3	0	8.4	4.17	0	0	0	0	0	0	0	0	0	0	0	0	0	0	0	0	15.8	5.83	1.67	1.67	0	3.33	0.833	0	0	0	0	0	0	0	0	0	0	0	0.204	0.833	0	0
3	2007	20	2	50	0	0	7.88	3	0	7.8	5	0	0	0	0	0	0	0	0	0	0	0	1.67	0	0	0	0	24.2	11.7	13.3	1.67	0	21.7	6.67	0.833	0	0	0	1.67	0.833	2.503	0	0	0	0.833	2.81821	0	0.833	0
3	2007	28	2	58	0	0	7.88	3	0	7.2	2.5	0	0	0	0	0	0	0	0	0	0	0	0.833	0	0.833	0	0	31.7	12.5	58.3	34.2	0	72.5	5	0	0.833	0	0	0	0	0.833	0.833	0.833	0.833	0	2.85	0	0	0
3	2007	12	3	72	0	0	7.88	3	0	8.4	0.833	0	0	0	0	0	0	0	0	0	0	0	0	0	2.5	0	0	25.8	6.67	5.83	9.17	0	6.67	0.833	0	0	0	0	0	0	0	0	0	0	0	0.403	0.833	0	0
3	2007	21	3	81	0	0	7.88	3	0	8.8	0.833	0	0	0	0	0	0	0	0	0	0	0	4.17	0	0	0	0	8.33	5.83	8.33	5	0	27.5	1.67	0	0	0	0	0	0	0	0	0	0	0	0.899	0	0	0
3	2007	30	3	90	0	0	7.88	3	0	9	4.17	0	0	0	0	0	0	0	0	0	0	52.5	5.83	0	1.67	0.833	0	12.5	9.17	5.83	25.8	0	5.83	0.833	0	0.833	0	0	0	0	0.833	0	0.833	0	0	0.90721	4.17	5.83	0
3	2007	11	4	101	0	0	7.88	3	0	9	2.5	1.67	0	0	0	0	0	0	0	0	0	3.33	0	0	0	0.833	0	4.17	8.33	0	2.5	0	3.33	0	0	0	0	0	0	0	0	0	0	0	0	0.17976	0.833	0.833	0
3	2007	23	4	113	0	0	7.88	3	0	10.8	4.17	0.833	0	0	0	0	0	0	0	0	0	25	0	0	0	0	0	18.3	14.2	10	8.33	0	24.2	0	0	0	0	0	0	0	0	0	0	0	0	0.76797	0	0	0
3	2007	2	5	122	0	0	7.88	3	0	12.4	22.5	0	0	0	0	0	0	0	0	0	0	0	0.833	0	0	0	0	1.67	5	12.5	1.67	0	21.7	0	0.833	0	0	0	0	0	0	0	1.67	0	0	0.789	0.833	0	0
3	2007	10	5	130	0	0	7.88	3	0	14.2	27.5	0	0	0	0	0	0	0	0	0	0	0	0	0	0.833	0	0	1.67	2.5	9.17	3.33	0	0.833	0	0	0	0	0	0	0	0	0	0.833	0	0	0.3911	1.67	0.833	0
3	2007	22	5	142	0	0	7.88	3	0	19.2	22.5	0	0	0	0	0	0	0	0	0	0	0	0	0	41.7	0	0	17.5	0	1.67	0	0	2.5	0	0.833	0	0	0	0	0	0	0	0	0.833	0	0.72999	2.5	7.5	0
3	2007	9	6	159	0	0	7.88	3	0	20.2	35.8	0	0	0	0	0	0	0	0	0	0	0	0	0	887	0	0	183	5.83	9.17	0	0	9.17	0	2.5	1.67	0	0	0	0	1.67	0	0	0	0	4.176	1.67	808	0
3	2007	20	6	170	0	0	7.88	3	0	22	5.83	0.833	0	0	0	0	0	0	0	0	0	0	0	0	69.2	0	0	30.8	12.5	0	0	0	11.7	0	40	0	0	0	0	0	0	0	0	0	0	1.3201	14.2	50	0
3	2007	2	7	182	0	0	7.88	3	0	24.2	7.5	0	0	0	0	0	0	0	0	0	0	0	0	0	13.3	0	0	2.5	3.33	0.833	0	0	17.5	0	5.83	0	0	0	0	0	0	1.67	1.67	0	0	1.83	47.5	24.2	0
3	2007	10	7	190	0	0	7.88	3	0	24.2	86.7	12.5	0	0	0	0	0	1.67	0	0	0	0	7.5	0	15	0	0	45.8	17.5	5	0	0	60	0	6.67	0	0	0	0	0	0	1.67	2.5	0	0	1.73593	58.3	10.8	0
3	2007	20	7	200	0	0	7.88	3	0	24.6	0	19.2	0	0	0	0	0	0	0	0	0	0	188	0	7.5	0	0	2.5	5.83	0	0	0	342	0	15.8	0	0	0	0	0	0	13.3	0	3.33	0	11.455	1.67	5	0
3	2007	30	7	210	0	0	7.88	3	0	25	0	0	20	10.8	30.8	0	1.67	0	0	0	0	0	60.8	0	4.17	0	0	3.33	0	0	0	0	138	0	0.833	0	0	0	0	0	0	1.67	0	1.67	0	4.5463	24.2	20.8	1.67
3	2007	10	8	220	0	0	7.88	3	0	23.2	0.833	0.833	1.67	2.5	4.17	0.833	60	0	0	0	0	0	1950	0	171	0	0	31.7	17.5	0.833	0	0	2680	0	21.7	1.67	0	0	0	0	1.67	31.7	7.5	0	0	66.214	23.3	117	0
3	2007	20	8	230	0	0	7.88	3	0	27	0	0	0	0	0	5.83	5	0	0	0	0	0	2210	7.5	5	500	0	91.7	19.2	0	0	0	887	0	50	0	0	0.833	0	0	0.833	24.2	0	4.17	0.833	58.1458	583	192	0
3	2007	31	8	241	0	0	7.88	3	0	26.4	0	0.833	0	0	0	0	2.5	0	0	0	0	0	2250	3.33	6.67	62.5	0	18.3	45.8	0	0	0	822	0	650	0	0	0	0	0	0	29.2	5.83	1.67	0	79.4326	292	87.5	0
3	2007	13	9	253	0	1	7.88	3	0	24	4.17	0	0	0	0	7.5	21.7	0	0	0	0	0	3080	104	1.67	1000	0	150	83.3	3.33	0	0	529	0	80	0	0	0	0	0	0	15	583	0.833	0.833	86.3242	300	63.3	0
3	2007	20	9	260	0	0	7.88	3	0	22.4	3.33	0	0	0	0	25.8	88.3	0	0	0	0	0	1120	896	3.33	2420	0	300	479	1.67	0	0	1310	0	2400	0	0	0	0	0	0	66.7	2100	0.833	0.833	149.695	75.8	34.2	0
3	2007	2	10	272	0	0	7.88	3	0	23.4	0	0	0	0	0	0	0	0	0	0	0	0	847	0.833	4.17	472	0	3.33	19.2	9.17	0	0	196	0	39.2	0	0	0	0	0	0	21.7	598	0	0	31.6707	278	0.833	0
3	2007	10	10	280	0	0	7.88	3	0	22.8	0	0	0	0	0	60.8	402	0	0	0	0	0	95.8	5	50	5	0	5.83	521	0	0	0	633	0	1320	0	0	0	0	0	0	771	292	0	0	53.0428	146	5.83	0
3	2007	19	10	289	0	0	7.88	3	0	19.8	4.17	0	0	0.833	0.833	0	14.2	0	0	0	0	0	65	0	50	4.17	0	17.5	48.3	79.2	0	0	232	0	126	0	0	0	0	0	0	28.3	249	0	0	13.3426	59.2	4.17	0
3	2007	30	10	300	0	0	7.88	3	0	19.2	0.833	9.17	0	0	0	6.67	15	0	0	0	0	0	5	0	217	0	0	18.3	20	617	0	0	242	0.833	286	10.8	0.833	0	0	0	11.633	0	292	0	0	21.273	108	12.5	0
3	2007	14	11	314	0	0	7.88	3	0	16	0	39.2	0	0	0	0	0	0	0	0	0	0	1.67	0	9.17	0	0	367	175	108	2.5	0	1400	0	408	1.67	0	0	0	0	1.67	13.3	69.2	0	0	51.2922	6.67	5.83	0
3	2007	19	11	319	0	0	7.88	3	0	14.2	2.5	0	0	0	0	0	0	0	0	0	0	0	0	0	4.17	0	0	517	100	733	4.17	0	525	30	15	27.5	3.33	0	0	0	30.83	12.533	242	0	1.67	28.8989	9.17	1.67	0
3	2007	3	12	333	0	0	7.88	3	0	13.2	0	55	0	0	0	0	0	0	0	0	0	0	0	0	0	0	0	8.33	117	271	3.33	0	90	0	0	1.67	0	0	0	0	1.67	0	11.7	0	0	4.07626	0.833	0.833	0
3	2007	10	12	340	0	0	7.88	3	0	13.2	0	17.5	0	0	0	0	0	0	0	0	0	0	0	0	1.67	0	0	20.8	62.5	742	0	0	37.5	0	0.833	0	0	0	0	0	0	0	7.5	0	0	7.77	0	0	0
3	2007	20	12	350	0	0	7.88	3	0	11.8	0.833	28.3	0	0	0	0	0	0	0	0	0	0	0	0	0	0	0	10.8	267	0	9.17	0	55.8	425	0	0	0	0	0	0	0	0.833	15.8	0	0	5.928	1.67	0	0
3	2007	28	12	358	0	0	7.88	3	0	11.5	0	17.5	0	0	0	0	0	0	0	0	0	0	0	0	0	0	0	23.3	31.7	60.8	6.67	0	36.7	0	0.833	0	0	0	0	0	0	0	3.33	0.833	0	1.66	0	0	0
3	2008	9	1	9	0	0	7.93	3	0	10.6	0	0	0	0	0	0	0	0	0	0	0	0	0	0	0	0	0	54.2	16.7	39.2	5.83	0	11.7	0.833	0	0	0	0	0	0	0	0	0.833	0	0	0.87183	4.17	0	0
3	2008	23	1	23	0	0	7.93	3	0	8.8	0	0	0	0	0	0	0	0	0	0	0	0.833	0	0	0	0	0	17.5	2.5	28.3	1.67	0	3.33	4.17	0	0	0	0	0	0	0	0	0	0	0	0.7592	4.17	0	0
3	2008	1	2	31	0	0	7.93	3	0	8	2.5	0	0	0	0	0	0	0	0	0	0	0	0.833	0	0	0	0	111	30.8	49.2	38.3	0	70	11.7	0	1.67	0	0	0	0	1.67	0	0	0	0	4.01087	7.5	0	0
3	2008	11	2	41	0	0	7.93	3	1	7.2	15	0	0	0	0	0	0	0	0	0	0	0	2.5	0	2.5	0	0	317	45	45	8.33	0	35.8	16.7	0.833	4.17	1.67	0	0	0	5.84	1.67	5.83	0	0	5.615	108	0	0
3	2008	26	2	56	0	1	7.93	3	0	7.6	1.67	0	0	0	0	0	0	0	0	0	0	3750	4.17	0	8.33	0.833	0	212	33.3	100	5	0	99.2	6.67	0	3.33	0	0	0	0	3.33	0	0	0	0	12.6866	15.8	0	0
3	2008	11	3	71	0	0	7.93	3	0	8.2	5.83	0	0	0	0	0	0	0	0	0	0	446	0	0	1.67	0	0	58.3	45	5.83	7.5	0	32.5	10	0	0	0	0	0	0	0	0	0	0	0	2.2744	6.67	0	0
3	2008	24	3	84	0	0	7.93	3	0	9.4	0	0	0	0	0	0	0	0	0	0	0.833	17.5	0	0	6.67	0	0	3.33	6.67	0.833	0	0	22.5	0	0	0	0	0	0	0	0	0	0	0	0	1.2177	10.8	0	0
3	2008	4	4	94	0	0	7.93	3	1	8	0	0	0	0	0	0	0	0	0	0	0	5.83	0	0	0.833	0	5.83	15	2.5	0.833	0.833	0	4.17	1.67	0	2.5	0	0	0	0	2.5	0	0	0	0	0.51	10	0	0
3	2008	8	4	98	0	0	7.93	3	0	10	70.8	0.833	0	0	0	0	0	0	0	0	0	517	0	0	650	0	0	83.3	13.3	9.17	0.833	0	95.8	3.33	0	0	0	0	0	0	0	0	2.5	0	0	7.3972	10	0.833	0
3	2008	18	4	108	0	0	7.93	3	0	12.2	1.67	0	0	0	0	0	0	0	0	0	0	1.67	0	0	19.2	0	0.833	0.833	5	1.67	0	0	66.7	0	0	0	0	0	0	0	0	0	3.33	0	0	1.0658	4.17	0.833	0
3	2008	28	4	118	0	0	7.93	3	0	14.2	2320	8.33	0	0	0	0	0	0	0	0	0.833	2.5	0	0	3140	0	0.833	20	517	375	0.833	0	508	0.833	0	0	0	0	0	0	0	0	267	0	0	22.7	4.17	0	0
3	2008	7	5	127	0	0	7.93	3	0	14	12200	6.67	0	0	0	0	0	0	0	0	0	4.17	0	0	1000	0	1.67	283	48.3	142	7.5	0	1180	1.67	0	0	0	0	0	0	0	3.33	208	0	0	21.929	36.7	0	0
3	2008	19	5	139	0	0	7.93	3	0	16.2	39400	0	0	0	0	0	0	0	0	0	1.67	0	0	0	1620	0	0	104	19.2	66.7	0	0	201	0	3.33	0	0	0	0	0	0	10	104	0	0	14.684	5	5.83	0
3	2008	30	5	150	0	1	7.93	3	0	17.2	1640	10	0	0	0	0	0	0	0	0	0	0	0	0	10	0	0	12.5	1.67	125	0	0	6.67	0	0	0	0	0	0	0	0	0	0.833	0.833	0	1.756	1.67	4.17	0
3	2008	10	6	160	0	0	7.93	3	0	19.8	16200	10.8	0	0	0	0	0	0	0	0	0	0	0	0	175	0	0.833	10	0	6.67	0	0	16.7	0	0	0	0	0	0	0	0	0.833	5.83	4.17	0	5.71898	0	6.67	0
3	2008	20	6	170	0	0	7.93	3	0	21.8	782	0	0	0	0	0	0	0	0	0	0	0	0	0	25.8	0	0	77.5	6.67	11.7	0	0	63.3	0	0	0.833	0	0	0	0	0.833	61.7	6.67	0	0	2.915	0	5.83	0
3	2008	1	7	181	0	0	7.93	3	0	21.2	16.7	0	0	0	0	0	0	0	0	0	0	0	1.67	0	333	0	2.5	292	0.833	2.5	0	0	53.3	0	19.2	0	0	0	0	0	0	4.17	91.7	10	0	8.819	171	16.7	0
3	2008	11	7	191	0	0	7.93	3	0	22.5	0	0	0	0	0	0	0	0	0	0	0	0	0	0	0.833	0	5	5.83	0.833	0	0	0	41.7	0	19.2	0	0	0	0	0	0	0	1.67	0.833	0	1.45526	1.67	1.67	0
3	2008	21	7	201	0	0	7.93	3	0	23.6	25	6.67	3.33	1.67	5	0	0	0	0	0	0.833	0.833	1570	0	383	0	0	2.5	6.67	5	0	0	696	0	0	0	0	0	0	0	0	45	60.8	7.5	0	49.0769	21.7	70.8	10
3	2008	31	7	211	0	0	7.93	3	1	23	26.7	117	142	4.17	146.17	0	0	0	0	0	0	0	217	0	0	0	3.33	1.67	0.833	0	0	0	45.8	0	0	0	0	0	0	0	0	9.17	0	0	0	7.87611	83.3	15	15
3	2008	21	8	231	0	0	7.93	3	0	27	0	0	0	0	0	0	21.7	5.83	0	0	0	0	292	0	2.5	0	0	6.67	11.7	0	0	0	331	0	10	0	0	0	0	0	0	1.67	0	0	0	10.2057	23.3	11.7	0.833
3	2008	1	9	241	0	0	7.93	3	0	22.2	0.833	0	0	0	0	7.5	4.17	3.33	0	0	0	0	3680	44.2	10	0	0	6.67	12.5	2.5	0	0	308	1.67	5.83	0	0	0	0	0	0	7.5	60.8	0	0	60.1563	137	0	0
3	2008	11	9	251	0	0	7.93	3	0	24.1	0	3.33	0	0	0	2.5	7.5	0	0	0	7.5	0	146	3.33	7.5	0.833	0	21.7	55	0	0	0	652	0.833	196	0	0	0	0	0	0	17.5	36.7	0	0	17.0145	11.7	97.5	0
3	2008	22	9	262	0	0	7.93	3	0	23	3.33	2.5	0	0	0	0.833	6.67	0	0	0	16.7	0	204	2.5	0	0	0	36.7	60.8	5	0	0	620	0	41.7	0	0	0	0	0	0	23.3	121	0	0	14.7167	36.7	58.3	0
3	2008	30	9	270	0	0	7.93	3	0	21.2	33.3	6.67	0.833	0	0.833	15.8	20	0	0	0	5.83	0	242	0	13.3	29.2	0	9.17	48.3	9.17	0	0	184	0	35	0	0	0	0	0	0	30.8	183	0	0	10.7612	58.3	6.67	2.5
3	2008	10	10	280	0	0	7.93	3	0	21.2	217	10	0	0	0	0.833	22.5	0	0	0	72.5	0	146	0	13.3	10	0	0.833	112	2.5	0	0	225	0	156	0	0	0	0	0	0	25.8	146	0	0	15.5083	242	3.33	0
3	2008	17	10	287	0	0	7.93	3	0	19.5	19.2	2.5	0	0	0	1.67	45.8	0	0	0	0	0	167	0	225	2.5	0	138	162	100	0	0	356	0	20.8	4.17	0	0	0	1.67	5.84	212	87.5	0	0	22.0692	342	175	0
3	2008	30	10	300	0	0	7.93	3	0	17.8	3.33	0.833	0	0	0	0	2.5	0	0	0	0.833	0	93.3	0	95.8	0	0	592	100	525	0	0	252	2.5	58.3	58.3	3.33	0	0	0	61.63	82.5	117	0	0	26.0241	64.2	21.7	0
3	2008	10	11	310	0	0	7.93	3	1	15.7	0.833	0.833	0	0	0	0.833	0.833	0	0	0	2.5	0	10	0	95.8	0	0	45.8	36.7	58.3	0.833	0	56.7	1.67	4.17	5	0	0	0	0	5	3.33	283	0	0	6.39201	56.7	0.833	0
3	2008	19	11	319	0	0	7.93	3	0	15.6	0	0	0	0	0	0	2.5	0	0	0	6.67	0	0.833	0	188	0.833	0	108	50	458	0	0	121	0	17.5	16.7	0.833	0	0	0	17.533	5	33.3	0.833	0	9.94	104	0	0
3	2008	1	12	331	0	0	7.93	3	0	14.4	0	0	0	0	0	0	0	0	0	0	0	0	0	0	15	0	0	18.3	10	288	0	0	89.2	0.833	4.17	9.17	1.67	0	0	0	10.84	0	0.833	0	0	5.5062	4.17	0.833	0
3	2008	10	12	340	0	0	7.93	3	0	13.2	0	0	0	0	0	0	0.833	0	0	0	0	0	0	0	9.17	0	0	5	17.5	225	4.17	0	19.2	2.5	1.67	0.833	0.833	2.5	0	0	4.166	1.67	11.7	0	0	3.5725	5.83	0	0
3	2008	19	12	349	0	0	7.93	3	0	10.6	83.3	0	0	0	0	0	2.5	0	0	0	4.17	0	0	0	9.17	0	1.67	358	108	775	58.3	0	186	29.2	0	10.8	1.67	0	0	0	12.47	4.17	129	0.833	0	21.1	17.5	0	0
3	2008	29	12	359	0	0	7.93	3	0	11	25.8	4.17	0	0	0	0	0.833	0	0	0	0	0	0	0	2.5	0	0	108	183	1760	45.8	0	5	2.5	0	0	0	0	0	0	0	1.67	15	0	0	20.846	77.5	0	0
3	2009	12	1	12	0	0	8.06	4	0	9	3.33	0	0	0	0	0	0	0	0	0	3.334	0	0	0	7.5	0	0	375	50	558	29.2	0	20.8	1.67	0	0.833	0	0	0	0	0.833	0.833	25.8	0	0	8.14	16.7	0	0
3	2009	21	1	21	0	0	8.06	4	0	9	0	0	0	0	0	0	0	0	0	0	0	0	0	0	4.17	0	0	133	15	283	14.2	0	24.2	3.33	0	1.67	0.833	0	0	0	2.503	0	2.5	0	0.833	6.28	10.8	0	0
3	2009	29	1	29	0	0	8.06	4	0	10	0	0	0	0	0	0	0	0	0	0	0	0	0	0	5.83	0	0	36.7	2.5	162	3.33	0	4.17	0	0	0	0	0	0	0	0	0	0.833	0	0	2.1164	5	0	0
3	2009	11	2	41	0	0	8.06	4	0	10	2.5	0	0	0	0	0	0	0	0	0	0	0	0	0	0	0	0	162	12.5	58.3	30.8	0	212	10	0	6.67	0	0	0	0	6.67	0	4.17	0	0	11	2.5	1.67	0
3	2009	20	2	50	0	0	8.06	4	0	9.4	1.67	0	0	0	0	0	0	0	0	0	5	0.833	0	0	0	0	0	125	17.5	100	108	0	66.7	8.33	0	0.833	0	0	0	0	0.833	0	33.3	0	0	6.22	6.67	0	0
3	2009	10	3	70	0	1	8.06	4	0	9.4	0	0	0	0	0	0	0	0	0	0	0	0.833	0	0	0	0	0	7.5	2.5	46.7	10.8	0	1.67	5	0	0.833	0	0	0	0	0.833	0	0.833	0	0	0.9551	0.833	0	0
3	2009	19	3	79	0	0	8.06	4	0	9.2	11.7	0	0	0	0	0	0	0	0	0	0	5	0	0	0	0	0	45.8	26.7	375	64.2	0	152	1.67	0	0	0	0	0	0	0	0	9.17	0	0	7.621	5	0	0
3	2009	30	3	90	0	0	8.06	4	0	10	0.833	0	0	0	0	0	0	0	0	0	0	18.3	0	0	0	0	0	23.3	8.33	31.7	10.8	0	5	0.833	0	0	0	0	0	0	0	0	0	0	0	0.76	5	0	0
3	2009	9	4	99	0	0	8.06	4	0	10.2	3.33	0	0	0	0	0	0	0	0	0	0	10	0	0	0.833	0	0	11.7	27.5	18.3	27.5	0	32.5	3.33	0	0	0	0	0	0	0	0	5	0	0	1.1257	3.33	0.833	0
3	2009	20	4	110	0	0	8.06	4	0	11.2	95.8	0.833	0	0	0	0	0.833	0	0	0	0.833	167	0	0	0.833	0	0	33.3	104	91.7	16.7	0	266	0.833	0	0	0	0	0	0	0	0	8.33	0	0	6.19	0	1.67	0
3	2009	29	4	119	0	0	8.06	4	0	12.2	25	0.833	0	0	0	0	0	0	0	0	0	1.67	0	0	0.833	0	0	1.67	14.2	13.3	2.5	0	17.5	0	0	0	0	0	0	0	0	0	0.833	0	0	0.5873	0	0	0
3	2009	12	5	132	0	0	8.06	4	0	14.2	80.8	1.67	0	0	0	0	0	0	0	0	1.67	7.5	0	0	0	0	0	13.3	41.7	54.2	4.17	0	17.5	1.67	0.833	0	0	0	0	0	0	0	11.7	0	0	1.26406	1.67	0.833	0
3	2009	21	5	141	0	0	8.06	4	0	15	1370	6.67	0	0	0	0	0	0	0	0	0	83.3	0	0	100	0	0	192	41.7	2.5	5.83	0	65	0	1.67	0	0	0	0	0	0	0	5.83	0	0	2.83563	5	13.3	0
3	2009	3	6	153	0	0	8.06	4	0	19.2	325	0	0	0	0	0	0	0	0	0	0	1.67	0	0	933	0	0	508	8.33	8.33	2.5	0	5.83	0	0	0	0	0	0	0	0	5	9.17	0.833	0	4.6183	12.5	7.5	0
3	2009	11	6	161	0	0	8.06	4	0	22	9.17	15	0	0	0	1.67	0	0	0	0	0	0	0.833	0	592	0	0	10.8	45.8	43.3	0.833	0	7.5	0	15.8	0	0	0	0	0	0	91.7	133	3.33	0	6.4537	9.17	44.2	0
3	2009	22	6	172	0	0	8.06	4	0	23.5	7.5	0	0	0	0	0	0	0	0	0	0	0	20	0	1010	0	0	7.5	200	64.2	0	0	167	0	65	0	0	0	0	0	0	69.2	450	8.33	0.833	16.6771	308	175	2.5
3	2009	1	7	181	0	0	8.06	4	0	25	3.33	10	0	0	0	0	0	0	0	0	0.833	0	250	0	108	0	0	1280	367	175	0	0	3.33	0	183	0	0	0	0	0	0	350	66.7	9.17	2.5	28.536	342	1320	83.3
3	2009	13	7	193	0	0	8.06	4	0	27	0	1.67	0.833	0	0.833	0	0	0	0	0	0	0	3620	0	12.5	0	0	19.2	60.8	3.33	0	0	1.67	0	200	0	0	0	0	0	0	8.33	3.33	2.5	0.833	69.8649	3770	4460	0
3	2009	23	7	203	0	0	8.06	4	0	22.8	1.67	55.8	0	0	0	2.5	1.67	0	0	0	0	0	162	0	55	3.33	0	0.833	56.7	146	0	0	59.2	0	10.8	0	0	0	0	0	0	80.8	129	0.833	0	8.70145	375	146	0
3	2009	3	8	213	0	0	8.06	4	0	26	0	0.833	0	0	0	0.833	0.833	0	0	0	1.67	0	6210	15.8	21.7	225	0	18.3	5.83	0	0	0	10.8	0	10	0	0	0	0	0	0	36.7	12.5	0.833	2.5	78.6651	288	162	0
3	2009	13	8	223	0	0	8.06	4	0	24	0	0	0	0	0	1.67	12.5	0	0	0	4.17	0	500	138	12.5	121	0	312	175	0.833	0	0	183	0	192	0	0	0	0	0	0	133	133	0	0.833	27.0568	1560	1080	0
3	2009	25	8	235	0	0	8.06	4	0	23	0	0	0	0	0	0	0.833	0	0	0	7.5	0	854	200	45.8	175	0	72.5	87.5	33.3	0	0	35	0	41.7	0	0	0	0	0	0	20.8	233	1.67	0.833	21.6881	442	20.8	0
3	2009	2	9	242	0	0	8.06	4	0	24	4.17	6.67	0	0	0	0	14.2	0	0	0	89.2	0	190	0	6.67	0.833	0	208	442	308	0	0	10.8	0	878	0	0	0	0	0	0	108	117	0	0	22.6576	108	108	0
3	2009	11	9	251	0	0	8.06	4	0	23.5	0.833	5.83	0	0	0	0	1.67	0	0	0	0	0	20	1.67	1.67	3.33	0	10.8	44.2	58.3	0	0	19.2	0	2.5	0	0	0	0	0	0	25.8	48.3	0	0	2.50425	41.7	4.17	0
3	2009	21	9	261	0	0	8.06	4	0	23.2	0	1.67	0	0	0	2.5	5.83	0	0	0	5	0	692	0	3.33	11.7	0	8.33	112	5.83	0	0	155	0	86.7	0	0	0	0	0	0	192	267	0	0.833	18.6007	100	5	0
3	2009	29	10	299	0	0	8.06	4	1	19	0	0.833	0	0	0	0.833	0	0	0	0	0	0	0	0	10.8	0	0	1.67	12.5	85.8	0	0	1.67	0	0.833	0.833	0	0	0	0	0.833	0	15	0	0	1.14	1.67	0.833	0
3	2009	30	10	300	0	0	8.06	4	0	18.8	0	11.7	0	0	0	1.67	0	0	0	0	0	0	4.17	0	0	0	0	10	30.8	583	0.00857	0	24.2	0	2.5	1.67	0	0	0	0	1.67	3.33	167	0	0	10	7.5	0.833	0
3	2009	9	11	309	0	0	8.06	4	0	17.8	3.33	1.67	0	0	0	0.833	0	0	0	0	2.5	0	0.833	0	1.67	0	0	35	50	54.2	1.67	0	15.8	0	87.5	0	0	0	0	0	0	1.67	20	0	0	2.05	0	0	0
3	2009	10	11	310	0	0	8.06	4	0	17.8	0.833	0.833	0	0	0	0	0	0	0	0	1.67	0	0	0	1.67	0	0	35	25.8	29.2	3.33	0	17.5	0	10	0	0	0	0	0	0	1.67	25.8	0	0	0.896	0	0	0
3	2009	20	11	320	0	1	8.06	4	0	16	0	0	0	0	0	0	0	0	0	0	0	0	0	0	1.67	0	0	12.5	2.5	15.8	3.33	0	16.7	0	0	0	0	0	0	0	0	0	0	0	0	0.865	0.833	0.833	0
3	2009	23	11	323	0	0	8.06	4	0	15.6	2.5	1.67	0	0	0	0	0	0	0	0	0	0	0	0	13.3	0	0	5	18.3	183	1.67	0	5	0	0	0	0	0	0	0	0	0	11.7	0	0	2.22	4.17	0	0
3	2009	1	12	331	0	0	8.06	4	0	15	0	0	0	0	0	0	0	0	0	0	0	0	0	0	0.833	0	0	5	5	30	4.17	0	6.67	0	0	0	0	0	0	0	0	0	0.833	0	0	0.45	0.833	0.833	0
3	2009	10	12	340	0	0	8.06	4	0	14.5	0	0	0	0	0	0	0	0	0	0	0	0	0	0	3.33	0	0.833	7.5	15	86.7	5.83	0	9.17	0	0	0	0	0	0	0	0	0	7.5	0	0	0.971	0	0	0
3	2009	18	12	348	0	1	8.06	4	0	14.5	0	0	0	0	0	0	0	0	0	0	0	0	1.67	0	0.833	0	0	0.833	26.7	141	0	0	8.33	0	0	0	0	0	0	0	0	0	1.67	0	0	1.57759	18.3	0.833	0
3	2010	11	1	11	0	0	8.25	4	0	11.6	0	0.833	0	0	0	0	0	0	0	0	0	0	0	0	0.833	0	0	5	15.8	38.3	4.17	0	12.5	0	0	0	0	0	0	0	0	0	0.833	0	0	0.64	1.67	0	0
3	2010	18	1	18	0	0	8.25	4	0	11.6	0	0	0	0	0	0	0	0	0	0	0	0	0	0	0	0	0	0.833	5	5.83	10	0	0	0	0	0	0	0	0	0	0	0.833	0	0	0	0.16	0.833	0	0
3	2010	27	1	27	0	0	8.25	4	0	10.4	5	0	0	0	0	0	0	0	0	0	0	0	0	0	0	0	0	50	9.17	146	19.2	0	69.2	1.67	0	0	0	0	0	0	0	0	13.3	0	0	3.97	64.2	0	0
3	2010	23	3	83	0	0	8.25	4	0	8.8	0	0	0	0	0	0	0	0	0	0	0	408	0	0	0.833	0	0	10	1.67	35.8	2.5	0	2.5	0	0	0	0	0	0	0	0	0	2.5	0	0	1.89	5.83	0.833	0
3	2010	1	4	91	0	0	8.25	4	0	10.2	2.5	0	0	0	0	0	0	0	0	0	0	433	0	0	0	0	0	10.8	6.67	8.33	1.67	0	5.83	0	0	0	0	0	0	0	0	0	4.17	0	0	1.37	1.67	0	0
3	2010	9	4	99	0	0	8.25	4	0	10.2	4.17	0	0	0	0	0	0	0	0	0	0	5.83	0	0	0.833	0	0	4.17	4.17	7.5	9.17	0	57.5	0.833	0	0.833	0	0	0	0	0.833	0	3.33	0	0	3.0261	30.8	1.67	0
3	2010	19	4	109	0	0	8.25	4	0	10.2	0.833	0	0	0	0	0	0	0	0	0	0	4.17	0	0	2.5	0	0	14.2	9.17	3.33	1.67	0	5.83	0	0	0	0	0	0	0	0	0	5	0	0	0.29	5	0.833	0
3	2010	29	4	119	0	0	8.25	4	0	11.4	40.8	0	0	0	0	0	0	0	0	0	0	10.8	0	0	0.833	0	0	4.17	10	5	0.833	0	0	0	0	0	0	0	0	0	0	0	7.5	0	0	0.184	1.67	0	0
3	2010	11	5	131	0	0	8.25	4	0	16.8	267	0	0	0	0	0	0	0	0	0	0	0	0	0	60.8	0	0	11.7	11.7	4.17	0	0	3.33	0	0.833	0	0	0	0	0	0	0	7.5	0	0	0.84268	0	0.833	0
3	2010	21	5	141	0	0	8.25	4	0	17	458	0.833	0	0	0	0	0	0	0	0	0	1.67	0	0	83.3	0	0	66.7	0.833	10	5	0	2.5	0	0.833	0	0	0	0	0	0	0	4.17	0	0	0.7468	0.833	5	1.67
3	2010	31	5	151	0	0	8.25	4	0	20	258	5	0	0	0	0	0	0	0	0	0	0	0	0	317	0	0	13.3	4.17	9.17	0	0	3.33	0	0.833	0	0	0	0	0	0	6.67	10.8	0	0	1.23337	0.833	0.833	0
3	2010	11	6	161	0	0	8.25	4	0	22	87.5	11.7	0	0	0	0	0	0	0	0	0	0	0	0	87.5	0	0	24.2	20.8	69.2	0	0	4.17	0	4.17	0	0	0	0	0	0	35	117	0	0	8.6027	1.67	58.3	10
3	2010	21	6	171	0	0	8.25	4	0	24.4	1.67	10	0	0	0	0	0	0	0	0	0.833	0	27.5	0	117	0	0	20	8.33	64.2	0	0	30	0	13.3	0	0	0	0	0	0	17.5	20	1.67	0	3.1079	4.17	8.33	2.5
3	2010	1	7	181	0	0	8.25	4	0	22.8	0	6.67	0	0	0	0	0	0	0	0	1.67	0	121	0	625	83.3	0	3.33	10	16.7	0.833	0	87.5	0	58.3	0	0	0	0	0	0	9.17	13.3	1.67	0.833	10.0823	25.8	83.3	1.67
3	2010	12	7	192	0	0	8.25	4	0	26.2	0	5.83	7.5	0	7.5	0	1.67	0	0	0	0	0	875	0	16.7	14.2	0	0	4.17	0	0	0	3.33	0	12.5	0	0	0	0	0	0	7.5	0	0	0	12.165	91.7	5	0
3	2010	20	7	200	0	0	8.25	4	0	25.4	0.833	3.33	6.67	0.833	7.503	0	8.33	0	0	0	0	0	1210	0	5	4.17	0	14.2	10.8	0.833	0	0	39.2	0	9.17	0	0	0	0	0	0	5	0.833	0	0	23.4189	7.5	10.8	0
3	2010	30	7	210	0	0	8.25	4	0	27.6	0	0.833	0	0	0	0	17.5	2.5	0	0	6.67	0	283	10	0	6.67	0	5.83	108	0	1.67	0	1480	0	5	0	0	0	0	0	0	11.7	0	0	2.5	35.0473	7.5	60.8	0
3	2010	10	8	220	0	0	8.25	4	0	28.2	0	0	0	0	0	0	5	1.67	0	0	0	0	1480	0	0.833	87.5	0	2.5	12.5	0	0	0	175	0	11.7	0	0	0	0	0	0	8.33	0	0	0.833	29.9405	333	854	0
3	2010	20	8	230	0	0	8.25	4	0	27.8	0	5.83	0	0	0	0	9.17	0	0	0	15	0	217	10.8	0	5	0	5	11.7	0	0	0	69.2	0	11.7	0	0	0	0	0	0	4.17	0	0	0	7.5245	392	575	0
3	2010	23	8	233	0	0	8.25	4	0	25.4	0	0	0	0	0	0	25	0	0	0	15	0	3020	1.67	85.8	41.7	0	10.8	64.2	3.33	0	0	112	0	15.8	0	0	0	0	0	0	142	0	0.833	0.833	80.24	937	1100	0
3	2010	30	8	240	0	0	8.25	4	0	27	0	0.833	0	0	0	0	1.67	0	0	0	588	0	167	0	0	0.833	0	5	83.3	0	0.833	0	175	0	91.7	0	0	0	0	0	0	1.67	0	0	0	9.3405	425	475	0
3	2010	13	9	253	0	0	8.25	4	1	23	83.3	8.33	0	0	0	5	94.2	2.5	0	0	283	0	1410	0	6.67	5	0	4.17	69.2	15	0	0	146	0.833	192	0	0	0	0	0	0	20.8	146	0	0	39.8299	129	16.7	0
3	2010	20	9	260	0	0	8.25	4	0	24.8	0	0.833	0.833	0.833	1.666	0.833	7.5	0	0	0	158	0	58.3	0.833	0	18.3	0	2.5	8.33	0.833	0	0	20	0	22.5	0	0	0	0	0	0	3.33	9.17	0.833	0	3.7667	150	3.33	0
3	2010	4	10	274	0	0	8.25	4	0	19	1.67	0.833	0	0	0	1.67	9.17	3.34	0.833	0	4.17	0	633	2.5	0.833	6.67	0	0.833	48.3	175	2.5	0	75	0	64.2	0	0	0	0	0	0	25	87.5	0	0	21.1967	592	6.67	0
3	2010	12	10	282	0	0	8.25	4	0	18.5	8.33	2.5	0	0	0	0	4.17	0	0	0	5.83	0	11.7	1.67	0	10	0	0.833	6.67	58.3	4.17	0	56	0.833	192	0	0	0	0	0	0	4.17	4.17	0	0	19.5677	408	4.17	0
3	2010	20	10	290	0	0	8.25	4	0	19.1	9.17	0	0	0	0	0.833	9.17	0	0	0	10.8	0	50	0	0	1.67	0	6.67	45.8	383	0.833	0	8.33	0	214	0	0	0	0	0	0	13.3	35	0	0	10.9703	4.17	0.833	0
3	2010	1	11	301	0	0	8.25	4	0	16	95.8	0	0	0	0	0	1.67	0	0	0	0	0	6.67	0	0.833	0	0	58.3	60.8	1090	0.833	10	8.33	3.33	5	8.33	0	0	0	0	8.33	40.8	55.8	0	0	15.5	0.833	0	0
3	2010	11	11	311	0	0	8.25	4	0	16.7	0	0	0	0	0	0	0	0	0	0	0	0	1.67	0	0.833	0	0	2.5	3.33	217	0	14.2	5.83	0	0.833	0	0	0	0	0	0	0	0.833	0	0	2.5282	0	0	0
3	2010	19	11	319	0	0	8.25	4	0	16	48.3	0	0	0	0	0	0	0	0	0	0.833	0	2.5	0	45.8	0.833	0	275	58.3	1240	0.833	10.8	183	0.833	21.7	6.67	0	0	0	0	6.67	12.5	41.7	0	0	18.8	0.833	0.833	0
3	2010	1	12	331	0	0	8.25	4	0	15.2	0	0	0	0	0	0	0	0	0	0	0	0	0	0	1.67	0	0	1.67	5.83	100	0	7.5	10.8	0	0	0	0	0	0	0	0	0	0	0	0	1.3436	0	0	0
3	2010	9	12	339	0	0	8.25	4	0	14.6	0.833	0	0	0	0	0	0	0	0	0	0	0	0	0	2.5	0	0	17.5	10	1220	0	31.7	433	0	1.67	0	0.8343	0	0	0	0.8343	4.17	2.5	0	0	20.641	0	0	0
3	2010	20	12	350	0	1	8.25	4	0	12.6	0.833	0	0	0	0	0	0	0	0	0	0	0	0	0	1.67	0	0	0	1.67	18.3	0	0.833	3.33	0	0	0	0	0	0	0	0	0	0	0	0	0.2757	0	0	0
3	2011	11	1	11	0	0	8.34	4	0	11.8	14.2	0	0	0	0	0	0	0	0	0	0	0	0	0	0	0	0	21.7	10.8	431	4.17	2.5	13.3	1.67	0	0.833	0	0	0	0	0.833	0	4.17	0	0	4.08	0.833	0	0
3	2011	21	1	21	0	0	8.34	4	0	11.2	0.833	0	0	0	0	0	0	0	0	0	0	0	0	0	0.833	0	0	4.17	0.833	22.5	0.833	2.5	0.833	0.833	0	0	0	0	0	0	0	0	0	0	0	0.299	0	0	0
3	2011	31	1	31	0	0	8.34	4	0	10.2	1.67	0	0	0	0	0	0	0	0	0	0	0	0	0	0	0	0	9.17	10.8	120	4.17	0.833	6.67	0	0	1.67	0	0	0	0	1.67	0	1.67	0	0	1.48	0	0	0
3	2011	11	2	41	0	0	8.34	4	0	9.8	0	0	0	0	0	0	0	0	0	0	0	0	0	0	0	0	0	1.67	0	2.5	0	0.833	1.67	0	0	0	0	0	0	0	0	0	0	0	0	0.12092	0	0	0
3	2011	21	2	51	0	0	8.34	4	0	8.4	0	0	0	0	0	0	0	0	0	0	0	0	0	0	0	0	0	2.5	0	41.7	1.67	2.5	5	0.833	0	0	0	0	0	0	0	0	0	0	0	0.48648	0	0	0
3	2011	1	3	61	0	0	8.34	4	0	8.8	0	0	0	0	0	0	0	0	0	0	0	0	0	0	0	0	0	1.67	1.67	5	2.5	1.67	3.33	0	0	0	0	0	0	0	0	0	0	0	0	0.133	0	0	0
3	2011	14	3	74	0	0	8.34	4	0	8.8	4.17	0	0	0	0	0	0	0	0	0	0	1.67	0	0	0	0	0	10.8	5	12.5	6.67	10	7.5	0	0	0	0	0	0	0	0	0	0	0	0	0.475	0	0	0
3	2011	23	3	83	0	0	8.34	4	0	8.8	45	0	0	0	0	0	0	0	0	0	0	0	0	0	0	0	0	5.83	5	17.5	0	47.5	5	0.833	0	0	0	0	0	0	0	0	0.833	0	0	1.04	1.67	0	0
3	2011	1	4	91	0	0	8.34	4	0	10	2.5	0	0	0	0	0	0	0	0	0	0	2960	0	0	0	0	0	39.2	15.8	40.8	1.67	14.2	44.2	0.833	0	0.833	0	0	0	0	0.833	0	0.833	0	0	7.21	0	0	0
3	2011	12	4	102	0	1	8.34	4	0	9.6	13.3	0	0	0	0	0	0	0	0	0	0	2.5	0	0	0	0	0	7.5	3.33	15.8	0.833	3.33	5.83	0	0	0	0	0	0	0	0	0	0.833	0	0	0.35861	0	0	0
3	2011	22	4	112	0	0	8.34	4	1	9.6	70	0	0	0	0	0	0	0	0	0	0	0	0	0	0	0	0	2.5	6.67	17.5	1.67	18.3	9.17	0	0	0	0	0	0	0	0	0	3.33	0	0	0.72118	0	0	0
3	2011	3	5	123	0	0	8.34	4	0	12	7680	0	0	0	0	0	0	0	0	0	0	5	0	0	0	0	0	13.3	42.5	4.17	0	12.5	9.17	1.67	0.833	0	0	0	0	0	0	0	17.5	0	0	0.53383	0.833	0	0
3	2011	13	5	133	0	0	8.34	4	0	13	992	0	0	0	0	0	0	0	0	0	130	0.833	325	18.3	0	4.17	0	3.33	133	18.3	2.5	7.5	123	2.5	26.7	0	0	0	0	3.33	3.33	0	0	0.833	0	14.6934	233	358	0
3	2011	23	5	143	0	0	8.34	4	0	15.6	15700	0	0	0	0	0	0	0	0	0	0	0	0	0	18.3	0	0	15	10	6.67	0.833	0	25	0	2.5	0	0	0	0	0	0	0	5.83	0	0	1.05	2.5	3.33	0
3	2011	30	5	150	0	0	8.34	4	0	17.6	27500	0	0	0	0	0	0	0	0	0	0	0	0	0	1.67	0	0	0.833	0.833	0.833	0	0	2.5	0.833	0	0	0	0	0	0	0	0	0	0	0	0.11	1.67	0	0
3	2011	1	6	151	0	0	8.34	4	0	19.4	27700	0	0	0	0	0	0	0	0	0	0	0	0	0	104	0	0	0	0	2.5	0	0	4.17	0	0.833	0	0	0	0	0	0	0	0	0	0	0.44883	1.67	0	0
3	2011	10	6	160	0	0	8.34	4	0	21	23200	0	0	0	0	0	0	0	0	0	0	0	0	0	542	0	0	5	0	0	0	0	2.5	0	19.2	0	0	0	0	0	0	0	0	0.833	0	1.7611	13.3	1.67	0
3	2011	20	6	170	0	0	8.34	4	0	22.4	8500	0	0	0	0	0	0	0	0	0	0	0	0	0	1080	0	0	7.5	5	2.5	0	2.5	19.2	0	20.8	0	0	0	0	0	0	1.67	4.17	0	0	2.15829	5	5.83	0
3	2011	30	6	180	0	0	8.34	4	0	22	13.3	0	0	0	0	0	0	0	0	0	1.67	0	0	0	408	0	0	15	83.3	3.33	0	0.833	41.7	0	91.7	0	0	0	0	0	0	0.833	183	5	0	7.3097	9.17	12.5	6.67
3	2011	11	7	191	0	0	8.34	4	0	20	19100	0	0	0	0	0	0	0	0	0	0	0	0	0	31.7	0	0	5.83	2.5	0	0	0	20.8	0	0	3.33	0	0	0	0	3.33	0.833	15	5	0	2.34893	9.17	4.17	0
3	2011	19	7	199	0	0	8.34	4	0	25.2	72.5	4.17	0.833	2.5	3.333	0	2.5	0.833	0	0	0	0	9.17	0	107	0	0	10.8	9.17	0	0	10.8	0	0	17.5	0	0	0	0	0	0	0.833	5.83	0	0	2.2375	388	11.7	0
3	2011	1	8	211	0	0	8.34	4	0	27.6	0	0	0	0	0	0	0	0	0	0	0.833	0	1670	5	5.83	16.7	0	121	183	0	74.2	0	412	0	175	0	0	0	0	0	0	21.7	0	0	1.67	34.451	175	80.8	0
3	2011	10	8	220	0	0	8.34	4	0	24	0.833	0	0	0	0	0	10.8	0	0	0	0	0	517	0	0	3.33	0	60.8	13.3	10	0	1.67	13.3	0	2.5	0	0	0	0	0	0	30	100	0.833	0	10.2321	154	9.17	0
3	2011	22	8	232	0	0	8.34	4	0	25	0.833	19.2	0	0	0	0	12.5	0	0	0	0	0	188	12.5	0	0.833	0	138	87.5	33.3	0	41.7	95.8	0	41.7	0	0	0	0	0	0	41.7	10.8	2.5	0	14.687	175	41.7	0
3	2011	30	8	240	0	0	8.34	4	0	23.6	0	15.8	0	0	0	0	10.8	0	0	0	0.833	0	83.3	5.83	0.833	5	0	8.33	17.5	13.3	0	13.3	28.3	0	5.83	0	0	0	0	0	0	48.3	91.7	0.833	0	5.1517	392	196	0
3	2011	12	9	252	1	1	8.34	4	0	22.4	8.33	2.5	0	0	0	0	0.833	0	0	0	0	0	183	5	0.833	2.5	0	1.67	2.5	16.7	0	3.33	17.5	0	0	0	0	0	0	0	0	5	5.83	0	0	4.60719	121	12.5	0
3	2011	19	9	259	0	0	8.34	4	0	22.8	0.833	9.17	0	0	0	0	0	0	0	0	20	0	154	0.833	1.67	0	0	22.5	25.8	7.5	0	20.8	24.2	0	22.5	0	0	0	0	0	0	83.3	104	0	0	4.6114	121	45.8	0
3	2011	30	9	270	0	0	8.34	4	0	20.6	5	7.5	0	0	0	3.33	1.67	0	0	0	33.3	0	85.8	12.5	4.17	48.3	0	7.5	60.8	20.8	0	1.67	201	0	133	0	0	0	0	0	0	27.5	24.2	0	0	10.5526	15.8	7.5	0
3	2011	10	10	280	0	0	8.34	4	0	20.5	0	0	0	0	0	0	0	0	0	0	1.67	0	10	0	0	5	0	9.17	9.17	15.8	0	67.5	17.5	0	25	0	0	0	0	0	0	0.833	4.17	0	0	2.18	48.3	3.33	0
3	2011	20	10	290	0	0	8.34	4	1	18	0.833	0	0	0	0	0	0	0	0	0	0	0	0.833	0	0	0	0	1.67	0.833	20	0	0.833	5	0	1.67	0	0	0	0	0	0	0	0	0	0	4.38	112	0.833	0
3	2011	1	11	301	0	0	8.34	4	0	15	17.5	0	0	0	0	0	0	0	0	0	0	0	1.67	0	1.67	0	0	45.8	20.8	292	1.67	20	27.5	0	45.8	0	0	0	0	0	0	4.17	41.7	0	0	4.7761	95.8	0.833	0
3	2011	11	11	311	0	0	8.34	4	0	13.4	0	0	0	0	0	0	0	0	0	0	0	0	0	0	0	0	0	3.33	10.8	79.2	0	3.33	8.33	0.833	0	0	0	0	0	0	0	0	0.833	0	0	1.12	9.17	0	0
3	2011	21	11	321	0	0	8.34	4	0	13.3	0	0	0	0	0	0	0	0	0	0	0	0	0	0	0	0	0	25.8	23.3	192	0.833	2.5	10.8	0	1.67	1.67	0	0	0	0	1.67	0	0.833	0	0	2.03542	2.5	0	0
3	2011	30	11	330	1	1	8.34	4	0	11	0	0	0	0	0	0.833	0	0	0	0	0	0	0	0	0	0	0	0	0	1.67	0	0	0	0	0	0	0	0	0	0	0	0	0	0	0	-2.5702	0.833	0	0
3	2011	12	12	342	0	0	8.34	4	0	10.8	0	0	0	0	0	0	0	0	0	0	0	0	0	0	0	0	0	0	2.5	10.8	0.833	5.83	8.33	1.67	0.833	0	0	0	0	0	0	0	0	0	0	0.4288	0.833	0	0
3	2011	20	12	350	0	0	8.34	4	0	10.8	0	0	0	0	0	0	0	0	0	0	0.833	0	0	0	0	0	0	6.67	6.67	17.5	5.83	1.67	12.5	3.33	0	0	0	0	0	0	0	0	0	0	0	0.531	0	0	0
3	2011	29	12	359	0	0	8.34	4	0	9.8	0.833	0	0	0	0	0	0	0	0	0	0	0	2.5	0	0	0	0	1.67	1.67	6.67	0.833	3.33	0	0.833	0	0	0	0	0	0	0	1.67	0	0	0	0.261	13.3	0	0
3	2012	11	1	11	0	1	7.32	2	0	10	0.833	0	0	0	0	0	0	0	0	0	0	0	0	0	0	0	0	0.833	0.833	0	0	0	1.67	0	0	0	0	0	0	0	0	0.833	0	0	0	0.0824	0.833	0	0
3	2012	24	1	24	0	1	7.32	2	0	9.8	0	0	0	0	0	0	0	0	0	0	0.833	0	0	0	0	0	0	0.833	0	3.33	0	0	1.67	0	0	0	0	0	0	0	0	0	0	0	0	0.0543	0	0	0
3	2012	13	2	43	1	1	7.32	2	0	7	3.33	0	0	0	0	0	0	0	0	0	0	0	0	0	0	0	0	1.67	0.833	14.2	2.5	0	14.2	0	0	0	0	0	0	0	0	0	0	0	0	0.808	0.833	0	0
3	2012	21	2	51	0	0	7.32	2	0	7	3.33	0	0	0	0	0	0	0	0	0	0	1.67	0	0	0	0	0	24.2	9.17	79.2	58.3	3.33	68.3	5	0	0	0	0	0	0	0	0	0	0	0	3.78	2.5	0	0
3	2012	1	3	61	0	0	7.32	2	0	7	0.833	0	0	0	0	0	0	0	0	0	0	0	0	0	0	0	0	6.67	5	6.67	15.8	0	5	4.17	0	0	0	0	0	0	0	0	0	0	0	0.9109	26.7	0	0
3	2012	12	3	72	0	0	7.32	2	0	7	41.7	0	0	0	0	0	0	0	0	0	0	0.833	0	0	0	0	1.67	25.8	75	48.3	121	0.833	50	5	0	0	0.833	0	0	0	0.833	0	0	0	0	5.952	4.17	0	0
3	2012	21	3	81	0	0	7.32	2	0	8	43.3	0	0	0	0	0	0	0	0	0	0	0	0	0	0	0	0.833	24.2	5	3.33	32.5	0	13.3	3.33	0	0	0	0	0	0	0	0	0	0	0	1.3954	5	0	0
3	2012	3	4	93	0	0	7.32	2	0	8	4.17	0	0	0	0	0	0	0	0	0	0	0	0	0	0	0	0	2.5	0	1.67	3.33	0	25	0	0	0	0	0	0	0	0	0	0	0	0	1.8995	3.33	0	0
3	2012	10	4	100	0	0	7.32	2	0	10.2	0	0	0	0	0	0	0	0	0	0	0	0	0	0	0	0	0	0	0	2.5	0	0	0.833	0	0	0	0	0	0	0	0	0	0	0	0	0.111	0.833	0	0
3	2012	24	4	114	0	0	7.32	2	0	12	1390	0	0	0	0	0	0	0	0	0	0	1.67	0	0	0	0	0.833	1.67	6.67	3.33	5.83	0	21.7	0	0	0	0	0	0	0	0	0	1.67	0	0	0.56728	0.833	0	0
3	2012	2	5	122	0	0	7.32	2	0	14.5	22000	1.67	0	0	0	0	0	0	0	0	0	0.833	0	0	0.833	0	0	2.5	12.5	9.17	1.67	0	13.3	0	1.67	0	0	0	0	0	0	0	45.8	0	0	0.98097	0	0.833	0
3	2012	12	5	132	0	0	7.32	2	0	15.2	24600	0.833	0	0	0	0	0	0	0	0	0	2.5	0	0	4.17	0	0	2.5	8.33	5	9.17	3.33	29.2	0	0	0	0	0	0	0	0	0	5	0	0	0.8485	6.67	29.2	0
3	2012	21	5	141	0	0	7.32	2	0	20	14400	0	0	0	0	0	0	0	0	0	0	0	0	0	15.8	0	0	5	1.67	2.5	5.83	0	17.5	0	0	0	0	0	0	0	0	0	1.67	0	0	1.6964	4.17	9.17	0.833
3	2012	1	6	151	0	0	7.32	2	0	19	17700	0	0	0	0	0	0	0	0	0	0	0	0	0	179	0	0	6.67	8.33	14.2	1.67	0	56.7	0.833	0	0	0	0	0	0	0	10	3.33	0	0	2.4225	1.67	5.83	0
3	2012	13	6	163	0	0	7.32	2	0	23	4390	0	0	0	0	0	0	0	0	0	0	0	0	0	200	0	4.17	7.5	8.33	91.7	14.2	0	175	200	0	0.833	2.5	0.833	4.17	6.67	15.006	10.833	14.2	0	0	27.9119	117	5	10
3	2012	21	6	171	0	0	7.32	2	0	20.8	269	0	0	0	0	0	0	0	0	0	0	0	0	0	12.5	0	1.67	0.833	9.17	5.83	0	0	5.83	0	3.33	0	0	0	0	0	0	0	2.5	0	0	0.267	0	1.67	0
3	2012	29	6	179	0	0	7.32	2	0	23.2	0.833	0.833	0	0	0	0	0	0	0	0	0	0	0.833	0	0	0	0	3.33	2.5	0.833	0	0	2.5	0	0	0	0	0	0	0	0	0	6.67	0	0	0.2009	0	0	0
3	2012	10	7	190	0	0	7.32	2	0	24.2	0	17.5	0	0	0	0	0	0	0	0	0	0	0.833	0	0.833	0	0	1.67	3.33	1.67	0	4.17	41.7	0	0	0	0	0	0	0	0	22.5	1.67	3.33	0	2.9708	0	1.67	3.33
3	2012	20	7	200	0	0	7.32	2	0	23.1	0	11.7	0	0	0	2.5	17.5	0	0	0	0	0	1300	0	0	0	0	0.833	14.2	2.5	0	4.17	442	0.833	6.67	0	0	0	0	0	0	46.7	200	7.5	1.67	33.1337	15	2.5	9.17
3	2012	31	7	211	0	0	7.32	2	0	26	0	11.7	0	0	0	0	28.3	4.17	0	0	0.833	0	583	0	0	0	0	64.2	125	0	0	80.8	198	0	20	0	0	0	0	0	0	5.83	1.67	0.833	0	12.066	18.3	508	2.5
3	2012	10	8	220	0	0	7.32	2	0	28	0.833	17.5	0	0	0	0	0	0	0	0	0	0	45	0	0	0	3.33	36.7	250	0	0	212	225	0	250	0	0	0	0	0	0	83.3	0	0	1.67	10.9426	77.5	117	1.67
3	2012	20	8	230	0	0	7.32	2	0	25.4	1.67	12.5	0	0	0	1.67	0.833	0	0	0	0	0	950	0	0	0	5	100	375	2.5	0	56.8	1320	0	48.3	0	0	0	0	0	0	67.5	87.5	0.833	0	56.6335	1230	9.17	1.67
3	2012	31	8	241	0	0	7.32	2	0	23	6.67	5.83	0	0	0	0	0	0	0	0	5	0	19.2	0	0.833	0	0.833	2.5	91.7	85	0	11.7	417	0	8.33	0	0	0	0	0	0	56.7	58.3	0	0	10.9935	417	125	0
3	2012	10	9	250	0	0	7.32	2	1	23.2	2.5	2.5	0	0	0	0	0	0	0	0	2.5	0	6.67	0	0.833	0	1.67	8.33	10	4.17	0	10	64.2	0	10.8	0	0	0	0	0	0	6.67	144	0.833	0	2.8251	50	11.7	0
3	2012	20	9	260	0	0	7.32	2	0	23.6	6.67	6.67	0	0	0	0	0	0	0	0	0	0	1.67	0	1.67	0	0	32.5	50	0	0	20.8	6.67	0	62.5	0	0	0	0	0	0	5	42.5	0	0	1.9177	10	2.5	0
3	2012	1	10	271	0	0	7.32	2	0	22.8	5.83	0.833	0	0	0	0	0	0	0	0	2.5	0	39.2	0.833	24.2	5	0	5.83	43.3	0	0	10.8	12.5	0	139	0	0	0	0	0	0	15	183	0	0	4.3465	9.17	3.33	0
3	2012	10	10	280	0	0	7.32	2	0	21.4	0	0	0	0	0	0	0	0	0	0	0	0	0	7.5	2.5	12.5	0	1.67	21.7	5	0	3.33	183	0	127	0	0	0	0	0	0	0.833	5.83	0	0	8.248	0.833	0.833	0
3	2012	22	10	292	0	0	7.32	2	0	21	0.833	4.17	4.17	0.833	5.003	0	0	0	0	0	0.833	0	112	4.17	0	4.17	0	2.5	225	10	0	7.5	254	0	533	0	0	0	0	0	0	5	125	0	0	21.4884	1.67	3.33	0
3	2012	30	10	300	0	0	7.32	2	0	20.4	0	0.833	0	0	0	0	0	0	0	0	0	0	7.5	0	0	2.5	0	4.17	175	83.3	0	6.67	122	0	604	0	0	0	0	0	0	1.67	1.67	0	0	10.3953	0	0.833	0
3	2012	12	11	312	0	0	7.32	2	0	17.2	121	0	0	0	0	0	0	0	0	0	0	0	10	0	0.833	0.833	0	91.7	38.3	233	1.67	4.17	575	0	200	2.5	0	0	0	0	2.5	10	15	0	0	20.6989	0	6.67	0
3	2012	21	11	321	0	0	7.32	2	0	16.2	15	0	0	0	0	0	0	0	0	0	0	0	6.67	0	0.833	0	0	158	0	300	1.67	13.3	76.7	4.17	146	10.8	0	0	0	0	10.8	10.8	72.5	0.833	0	10.3	1.67	0.833	0
3	2012	6	12	336	1	1	7.32	2	0	15	0.833	0	0	0	0	0	0	0	0	0	0	0	0	0	0	0	0	5	5.83	195	1.67	9.17	23.3	5	14.2	0.833	0	0	0	0	0.833	0	5	0	0	4.19555	0	0	0
3	2012	17	12	347	0	0	7.32	2	0	13	0	0	0	0	0	0	0	0	0	0	0	0	0	0	0	0	0	16.7	18.3	410	3.33	19.2	43.3	7.5	5	3.33	2.5	0	0	0	5.83	0	5	0	0	6.89	0.833	0	0
3	2012	28	12	358	0	0	7.32	2	0	11.4	0.833	0	0	0	0	0	1.67	0	0	0	0	0	2.5	0	0	0	0	80.8	0	767	40	16.7	144	6.67	14.2	0.833	1.67	0.833	0	0	3.336	10.8	95.8	0	0	14.0982	5	3.33	0
3	2013	10	1	10	0	0	8.05	4	0	8.3	0	0	0	0	0	0	0	0	0	0	0	0	0	0	0	0	0	9.17	8.33	73.3	33.3	7.5	6.67	6.67	0	0.833	0	0	0	0	0.833	0.833	0	0	0	1.55723	4.17	0	0
3	2013	22	1	22	0	1	8.05	4	0	9.2	0	0	0	0	0	0	0	0	0	0	0	0	0	0	0	0	0	1.67	1.67	8.33	0	0	0.833	0.833	0	0	0	0	0	0	0	0	0	0	0	-0.139	2.5	0	0
3	2013	30	1	30	0	0	8.05	4	0	9.6	0	0	0	0	0	0	0	0	0	0	0	0	0	0	0	0	0	14.2	9.17	29.2	17.5	0.833	45	4.17	0	0	0	0	0	0	0	0	0.833	0	0	1.113	0	0	0
3	2013	13	2	43	0	0	8.05	4	0	9.8	0	0	0	0	0	0	0	0	0	0	0	0	0	0	0	0		6.67	11.7	10	0	0	11.7	3.33	0	0	0	0	0	1.67	1.67	0	0	0	0	0.4895	0.833	0	0
3	2013	22	2	52	0	0	8.05	4	0	9.8	0	0	0	0	0	0	0	0	0	0	0	2.5	0	0	0	0	0.833	60.8	13.3	26.7	30.8	0	71.7	5	0	0.833	0	0	0	0	0.833	0	0.833	0	0	2.06	0	0	0
3	2013	5	3	65	0	0	8.05	4	0	9.2	0	0	0	0	0	0	0	0	0	0	0	0	0	0	0	0	0	40.8	11.7	30.8	80.8	0.833	44.2	10.8	0	0	0	0	0	0	0	0	0.833	0.833	0	3.9143	6.67	0	0
3	2013	14	3	74	0	0	8.05	4	0	9.8	38.3	0	0	0	0	0	0	0	0	0	0	8.33	0	0	0	0	0	10	10.8	17.5	6.67	0	20.8	1.67	0	0	0	0	0	0	0	0	10.8	0	0	1.82872	5.83	0	0
3	2013	22	3	82	0	0	8.05	4	0	10.2	240	0	0	0	0	0	0	0	0	0	0	10.8	0	0	0	0	0	167	13.3	5.83	14.2	0	35	2.5	0	0	0	0	0	0	0	0	7.5	0.833	0	2.58	10	0	0
3	2013	4	4	94	0	0	8.05	4	0	9	183	0	0	0	0	0	0	0	0	0	0	167	0	0	0	0	20	27.5	94.2	2.5	95.8	0	70	2.5	0	0.833	0	0	0	0	0.833	0	5	0	0	3.52	3.33	0.833	0
3	2013	11	4	101	0	0	8.05	4	0	10.8	33.3	0	0	0	0	0	0	0	0	0	0	0.833	0	0	0	0	0	5.83	9.17	2.5	2.5	0	24.2	0	0	0	0	0	0	0	0	0	1.67	0	0	0.351	1.67	0	0
3	2013	22	4	112	0	0	8.05	4	0	12	28.3	0.833	0	0	0	0	0	0	0	0	0	0	1.67	0	0	0	8.33	5	11.7	7.5	13.3	0	31.7	2.5	20	0.833	0	0	0	0	0.833	5.833	8.33	0	0	3.06137	1.67	0.833	0
3	2013	30	4	120	0	0	8.05	4	0	14	6.67	0	0	0	0	0	0	0	0	0	0	0	0.833	0	0	0.833	0.834	0.833	0.833	6.67	0.833	0	2.5	0	0	0	0	0	0	0	0	2.5	0.833	0	0	0.43792	0	0	0
3	2013	8	5	128	0	0	8.05	4	0	15.2	30	0	0	0	0	0	0	0	0	0	0	0	0.833	0	0	0	1.67	23.3	2.5	5.83	5	0.833	25	0	0.833	0	0	0	0	0	0	0	0.833	0	0	0.52044	0	0	0
3	2013	20	5	140	0	0	8.05	4	0	19.4	8.33	0.833	0	0	0	0	0	0	0	0	0	0	0	0	10	0	0	35	0	27.5	0	0	9.17	0	2.5	0	0	0	0	0	0	0	5	0	0	0.5039	0.833	0	0
3	2013	31	5	151	0	0	8.05	4	0	22	6.67	0	0	0	0	0	0	0	0	0	0	0	0	0	1020	0	1.67	150	3.33	4.17	0.833	0.833	19.2	0	14.2	0	0	0	0	0	0	5.83	58.3	3.33	0	5.9915	0	4.17	0.833
3	2013	10	6	160	0	0	8.05	4	0	21.2	200	0	0	0	0	0	0	0	0	0	5.83	0	0	0	2330	0	0.833	225	100	142	1.67	1.67	150	0	267	0	0	0	0	0	0	10.8	250	5	0	21.2774	58.3	475	3.33
3	2013	20	6	170	0	0	8.05	4	0	22.4	0	0	0	0	0	0	0	0	0	0	0	0	0	0	100	0	0.833	58.3	4.17	0	0	3.33	15	0	17.5	0	0	0	0	0	0	3.33	25.8	3.33	0	2.5002	7.5	258	0
3	2013	1	7	181	0	0	8.05	4	0	24.8	0	0	0.833	0	0.833	0	0	0	0	0	4.17	0	0	0	1560	0	0.833	200	41.7	12.5	3.33	0	74.2	0	48.3	1.67	0	0	0	0.833	2.503	44.2	72.5	1.67	0	9.307	41.7	9.17	0
3	2013	10	7	190	0	0	8.05	4	0	24.4	0	28.3	8.33	0	8.33	0	0	0	0	0	0.833	0	2.5	0	89.2	0	0	33.3	100	10.8	20	0	359	0	133	0	0	0	0	0	0	5.833	108	4.17	0	15.6539	154	44.2	0.833
3	2013	19	7	199	0	0	8.05	4	1	22.5	0	6.67	35	0	35	0	0	0	0	0	0	0	5	0	242	0	0	4.17	225	18.3	0	1.67	550	0.833	5	0	0	0	0	0	0	22.5	175	3.33	0	15.031	700	0	0.833
3	2013	31	7	211	0	0	8.05	4	0	24.8	0	4.17	10	0	10	3.33	0	0	0	0	0	0	10	4.17	3.33	11.7	0	9.17	7.5	0	0	1.67	160	0	41.7	0	0	0	0	0	0	0	0.833	0	0	3.7507	11.7	19.2	0
3	2013	9	8	219	0	0	8.05	4	0	25	0	5	0.833	0.833	1.666	0	0.833	0	0	0	0	0	3.33	0	20	0.833	0	21.7	18.3	0	0	14.2	77.5	0	18.3	0	0	0	0	0	0	3.33	10	0	0.833	2.5746	12.5	4.17	0
3	2013	20	8	230	0	0	8.05	4	0	25.5	0	7.5	0.833	0	0.833	0	5.83	0	0	0	0	0	4150	17.5	2.5	27.5	0.833	15.8	200	0.833	0	14.2	292	0	55.8	0	0	0	0	0	0	13.3	6.67	0	0.833	90.489	41.7	64.2	0
3	2013	30	8	240	0	0	8.05	4	0	26.4	0	2.5	0	0	0	0	2.5	0	0	0	0.833	0	567	8.33	4.17	0	0.833	2.5	3.33	0	0	0	27.5	0	13.3	0	0	0	0	0	0	0	0	0	0.833	6.551	23.3	3.33	0
3	2013	10	9	250	0	0	8.05	4	0	23.4	0	6.67	0	0	0	0	2.5	0	0	0	0.833	0	1550	29.2	0.833	10.8	0	2.5	10.8	0	0	4.17	104	0	95.8	0	0	0	0	0	0	25.8	18.3	0	0	26.8713	62.5	20	0
3	2013	20	9	260	0	0	8.05	4	0	22	0	0	0	0	0	0	0	0	0	0	3.33	0	5.83	0	0	4.17	0	0.833	6.67	0.833	0	1.67	49.2	0	13.3	0	0	0	0	0	0	0.833	5.83	0	0	1.253	4.17	1.67	0
3	2013	30	9	270	0	0	8.05	4	0	19	0	10	0	0	0	0.833	1.67	0	0	0	45.8	0	24.2	14.2	5.83	19.2	0.833	11.7	72.5	7.5	0	7.5	269	0	102	0	0	0	0	0	0	14.2	25.8	0	0	9.4647	10.8	1.67	0
3	2013	10	10	280	0	0	8.05	4	0	18	0	12.5	0	0	0	1.67	0	0	0	0	2.5	0	167	0	2.5	0	0	108	41.7	15.8	0	0.833	258	0	112	0	0	0	0	0	0	13.3	45.8	0	0	9.72	9.17	2.5	0
3	2013	21	10	291	0	0	8.05	4	0	16.4	0	3.33	0	0	0	0	0	0	0	0	0.833	0	7.5	0	2.5	0	0	12.5	10.8	50	0	11.7	267	0.833	41.7	0	0	0	0	0	0	2.5	44.2	0	0	8.36759	2.5	0	0
3	2013	31	10	301	0	0	8.05	4	0	16	0	4.17	0	0	0	0	0	0	0	0	0	0	0	0	3.33	0		10.8	0.833	107	0	7.5	11.7	0	4.17	0.833	0	0	0	0	0.833	0.833	5	0	0	1.76821	0.833	0.833	0
3	2013	11	11	311	0	0	8.05	4	0	16.8	0	0.833	0	0	0	0	0	0	0	0	0	0	0	0	10.8	0	0	0.833	8.33	100	0	6.67	5	0	5.83	0.833	1.67	0	0	0	2.503	0	3.33	0	0	1.5	1.67	1.67	0
3	2013	21	11	321	0	0	8.05	4	0	15	0	0	0	0	0	0	0	0	0	0	0	0	0	0	3.33	0.833	0	5.83	1.67	40.8	0	10	7.5	0	0.833	0	0	0	0	0	0	0	5	0.833	0	1.06	0	0.833	0
3	2013	3	12	333	1	1	8.05	4	0	13	0	0	0	0	0	0	0	0	0	0	0	0	0	0	0	0	0	2.5	0	0.833	0	0	0.833	0	0	0	0	0	0	0	0	0	0	0	0	0.04	0.833	0.833	0
3	2013	11	12	341	0	1	8.05	4	1	9	0	0	0	0	0	0	0	0	0	0	0	0	0.833	0	0	0	0.833	0	0	9.17	2.5	0	0	0	0.833	0	0	0	0	0	0	0	0	0	0	0.135	0	0	0
3	2013	20	12	350	0	0	8.05	4	0	8	0	0	0	0	0	0	0	0	0	0	0	0	0	0	0	0	0	0.833	0	2.5	0.833	0	0	0.833	0	0	0	0	0	0	0	0.833	0.833	0	0	0.0775	0	0	0
3	2013	30	12	360	0	0	8.05	4	0	8	0	0	0	0	0	0	0	0	0	0	0	0	0	0	0	0	0	3.33	0.833	19.2	2.5	3.33	0.833	2.5	0	0	0	0	0	0	0	0	2.5	0	0	0.347	0	0	0
3	2014	10	1	10	0	0	8.57	4	0	9.8	0	1.67	0	0	0	0	0	0	0	0	0	0	0	0	0	0	6.67	2.5	0	13.3	0	0	0.833	0	0	0	0	0	0	0	0	0	0	0	0	0.204	0	0.833	0
3	2014	20	1	20	0	0	8.57	4	0	10.8	0	0	0	0	0	0	0	0	0	0	0	0	0	0	0	0	0	0.833	0	30	0	0	1.67	1.67	0.833	0	0	0	0	0	0	0	0	0	0	0.482	0	0	0
3	2014	3	2	33	0	0	8.57	4	1	8.9	0	0	0	0	0	0	0	0	0	0	0	0	0	0	1.67	0	2.5	8.33	3.33	59.2	2.5	0.833	0.833	1.67	0.833	0.833	0	0	0	0	0.833	0.833	1.67	0.833	0	1.8388	0.833	0	0
3	2014	12	2	42	0	0	8.57	4	0	10	0	0	0	0	0	0	0	0	0	0	0	7.5	0	0	0	0	0.833	0.833	3.33	9.17	0	0.833	2.5	1.67	0	0.833	0	0	0	0	0.833	0	0	0	0	0.21097	0	0	0
3	2014	21	2	51	0	0	8.57	4	0	10	0	0	0	0	0	0	0	0	0	0	0	0.833	0	0	0	0	0	0.833	1.67	5	0	0	1.67	0	0	0	0	0	0	0	0	0	0	0	0	0.0639	0	0	0
3	2014	4	3	64	0	0	8.57	4	0	10.2	0	0	0	0	0	0	0	0	0	0	0	0.833	0	0	0	0	0	9.17	5.83	10	0.833	0	4.17	0	0	0	0	0	0	0	0	0	0.833	0	0	0.272	0	0	0
3	2014	12	3	72	0	0	8.57	4	1	9.6	0	0	0	0	0	0	0	0	0	0	0	0	0	0	0	0	0	0.833	4.17	9.17	4.17	0	5.83	0	0	0	0	0	0	0	0	0	0	0	0	0.26	0.833	0	0
3	2014	24	3	84	0	0	8.57	4	0	10.4	0.833	0.833	0	0	0	0	0	0	0	0	0	19.2	0	0	0	0	0	7.5	25	8.33	4.17	0	22.5	0	0	0	0	0	0	0	0	0	0	0	0	0.816	0	0.833	0
3	2014	4	4	94	0	0	8.57	4	0	9.6	279	1.67	0	0	0	0	0	0	0	0	0	142	0	0	1.67	0	0	7.5	5	32.5	30.8	0	59.2	1.67	0.833	0	0.833	0	0	0	0.833	0	14.2	0	0	2.31381	11.7	0	0
3	2014	11	4	101	0	0	8.57	4	0	11.4	408	1.67	0	0	0	0	0	0	0	0	0	292	0	0	3.33	0.833	1.67	10	5.83	16.7	17.5	1.67	25	0.833	0	0	0	0	0	0	0	0	55.8	0	0	2.77	8.33	6.67	0
3	2014	21	4	111	0	0	8.57	4	0	12.6	1170	0	0	0	0	0	0	0	0	0	0	117	0	0	10	0	0	2.5	9.17	4.17	5.83	0	22.5	0	0	0	0	0	0	0	0	0	4.17	0	0	2.74269	2.5	3.33	0
3	2014	5	5	125	1	1	8.57	4	0	15.4	1.67	0	0	0	0	0	0	0	0	0	0	0	0	0	1.67	0	0	3.33	1.67	4.17	0	0	0.833	0	0	0	0	0	0	0	0	0	0	0	0	0.554	12.5	5	0
3	2014	13	5	133	0	0	8.57	4	0	16.3	83.3	0.833	0	0	0	0	0	0	0	0	0	0	0	0	100	0	0	2.5	10	10	2.5	0	21.7	0	4.17	0	0	0	0	0	0	0	0	0	0	3.6442	0.833	3.33	0
3	2014	22	5	142	0	0	8.57	4	0	19	64.2	0.833	0	0	0	0	0	0	0	0	0	0	0	0	16.7	0	0	8.33	0.833	0.833	0	0	21.7	0	0.833	0	0	0	0	0	0	0.833	3.33	0	0	0.6561	1.67	2.5	0
3	2014	30	5	150	0	0	8.57	4	0	20.5	11.7	4.17	0	0	0	0	0	0	0	0	0	0	0	0	333	0	0	142	17.5	0	0	0	25.8	0	38.3	0	0	0	0	0	0	3.33	66.7	4.17	0	4.461	0.833	8.33	0
3	2014	11	6	161	0	0	8.57	4	0	23.2	19.2	26.7	0	0	0	0	0	0	0	0	0	0	0	0	642			17.5	4.17	41.7	0.833	7.5	26.7	0	64.2	0.833	0	0	0	0	0.833	10	64.2	1.67	0	5.4916	4.17	11.7	0
3	2014	20	6	170	0	0	8.57	4	0	22	558	3.33	0	0	0	0	0.833	0	0	0	0	0	0	0	80.8	0	0.833	10.8	2.5	16.7	0	14.2	5	0	5	0	0	0	0	0	0	19.2	55.8	16.7	0.833	8.199	9.17	45.8	0
3	2014	30	6	180	0	0	8.57	4	0	22.5	9.17	7.5	0	0	0	0	0	0	0	0	0	0	0	0	54.2	0	0	3.33	0.833	24.2	0	5	1.67	0	1.67	0	0	0	0	0	0	10.8	16.7	0	0.833	307.996	8.33	5.83	0
3	2014	10	7	190	0	0	8.57	4	0	26.6	1.67	6.67	1.67	0	1.67	0	0.833	0	0	0	0	0	0.833	0	152	1.67	0.833	66.7	41.7	3.33	0	0	60.8	0	50	0	0	0	0	0	0	2.5	2.5	0.833	0	3.3617	175	54.2	0
3	2014	21	7	201	0	0	8.57	4	0	26.6	0.833	24.2	11.7	0	11.7	1.67	3.33	0	0	0	0	0	44.2	0	12.5	5	0.833	11.7	95.8	0	0	30	75	0	138	0	0	0	0	0	0	26.7	0	0	0	6.3225	87.5	87.5	0
3	2014	31	7	211	0	0	8.57	4	0	25.4	0.833	8.33	0	0	0	0	12.5	0.833	0	0	0	0	1000	0	7.5	1.67	0	1.67	13.3	1.67	0	121	27.5	0	36.7	0	0	0	0	0	0	64.2	0	0	0	23.1872	95.8	83.3	0
3	2014	11	8	221	0	0	8.57	4	0	27.6	4.17	5	0	0	0	0	3.33	0	0	0	0	0	17.5	0	8.33	0	0	5	6.67	0.833	1.67	1.67	4.17	0	6.67	0	0	0	0	0	0	2.5	0	0	0	0.4817	15	13.3	0
3	2014	12	8	222	0	0	8.57	4	0	27.6	0	5	0.833	0	0.833	0	5.83	0	0	0	5.83	0	64.2	0	0.833	0	0	83.3	154	0	0	5.83	55	0	85.8	0	0	0	0	0	0	6.67	0	0	0	3.8108	63.3	112	0
3	2014	20	8	230	0	0	8.57	4	1	25.4	2.5	0.833	2.5	0	2.5	0	2.5	0	0	0	2.5	0	583	0	2.5	5.83	0	75	3.33	3.33	1.67	4.17	144	0.833	29.2	0	0	0	0	0	0	4.17	2.5	0	0	13.8717	60.8	5	0
3	2014	29	8	239	0	0	8.57	4	1	25.4	19.2	1.67	0	0	0	0	1.67	0.833	0	0	7.5	0	0	55	0	0	0	25	3.33	29.2	0	12.5	14.2	0	16.7	0	0	0	0	0	0	5	5	0	0	2.5282	200	183	0
3	2014	10	9	250	0	0	8.57	4	0	25.2	0	0	0	0.833	0.833	0	2.5	0	0	0	8.33	0	30	1.67	0	0.833	0	15.8	3.33	1.67	0	7.5	7.5	0	13.3	0	0	0	0	0	0	1.67	2.5	0	0	0.9016	23.3	7.5	0
3	2014	19	9	259	0	0	8.57	4	1	23.8	3.33	3.33	0	0	0	0	0.833	0	0	0	0.833	0	3.33	0.833	0.833	0	0	0	0	1.67	0	0.833	2.5	0.833	0.833	0	0	0	0	0	0	0	5	0	0	0.2021	3.33	5	0
3	2014	30	9	270	0	0	8.57	4	0	21.6	5.83	1.67	0.833	0	0.833	0	5	0.833	0	0	0	0	20	0.833	0	0	0	0	8.33	3.33	0.833	1.67	34.2	0.833	14.2	0	0	0	0	0	0	12.5	23.3	0	0	1.64848	13.3	0.833	0
3	2014	8	10	278	0	0	8.57	4	0	19.8	4.17	0	0	0	0	0	0.833	0	0	0	1.67	0	31.7	0	0	0	0	3.33	21.7	25	0	0.833	20.8	0	20.8	0	0	0	0	0	0	8.33	10.8	0	0	2.22848	0.833	2.5	0
3	2014	23	10	293	0	0	8.57	4	0	17.6	3.33	4.17	0	0	0	0	0	0	0	0	0.833	0	3.33	0	0.833	1.67	0	44.2	0	66.7	0.833	4.17	102	1.67	125	0.833	0	0	0	0	0.833	14.2	2.5	0	0	6.92182	2.5	4.17	0
3	2014	31	10	301	0	0	8.57	4	0	16.2	12.5	11.7	0	0	0	0	0.833	0	0	0	0	0	0.833	0	0	0	0	350	16.7	200	0	11.7	58.3	0.833	55.8	1.67	0	0	0	0	1.67	1.67	5	0	0	8.39	2.5	0	0
3	2014	10	11	310	0	0	8.57	4	0	15.2	5	0	0	0	0	0	0	0	0	0	0	0	0	0	1.67	0	0	40	49.2	500	0	8.33	29.2	0.833	5	3.33	0	0	0	0	3.33	5	20.8	0	0	7.03	0	0.833	0
3	2014	21	11	321	0	0	8.57	4	0	15.2	1.67	0	0	0	0	0	0	0	0	0	0	0	0	0	0	0	0	9.17	1.67	63.3	1.67	17.5	12.5	0.833	0	8.33	0	0	0	0	8.33	0	15.8	0	0	1.47	1.67	0	0
3	2014	1	12	331	0	0	8.57	4	1	12	0	0	0	0	0	0	0	0	0	0	0	0	0	0	0	0	0	0.833	1.67	20.8	0	7.5	11.7	0	0	0	0	0	0	0	0	0	0.833	0	0	0.37621	0.833	0	0
3	2014	10	12	340	0	0	8.57	4	0	13.6	0	0	0	0	0	0	0	0.833	0	0	0	0	0	0	0	0	0	5	0	14.2	0	2.5	5.83	0	0	0	0	0	0	0	0	0	0	0	0	0.201	0	0	0
3	2015	13	1	13	0	1	8.57	4	1	8	0	0	0	0	0	0	0	0	0	0	0	0	0	0	0	0	0	0	0.833	0	0	0	0	0	0	0	0	0	0	0	0	0	0	0	0	0.003	0	0	0
3	2015	23	1	23	0	0	8.57	4	0	11	0	0	0	0	0	0	0	0	0	0	0	0	0	0	0	0	0	0.833	0	0	0	0.833	0.833	0	0	0	0	0	0	0	0	0	0	0	0	0.0213	0	0	0
3	2015	30	1	30	0	0	8.57	4	0	10.4	0	0	0	0	0	0	0	0	0	0	0	0	0	0	0	0	0	0.833	0.833	3.33	0	0	1.67	0	0	0	0	0	0	0	0	0	0	0	0	0.059	0	0	0
3	2015	9	2	39	0	0	8.57	4	0	9.8	5	0	0	0	0	0	0	0	0	0	0	0	2.5	0	0.833	0	0.833	39.2	2.5	34.2	8.33	0	5.83	10	0	2.5	3.33	0	0	0.833	6.663	0	0	0	0	2.42399	0.833	0.833	0
3	2015	20	2	50	0	0	8.57	4	1	8.2	12.5	1.67	1.67	1.67	3.34	0	0	0	0	0	0	0.833	0	0	0	0	0	0.833	0	10	0	0	9.17	1.67	0	0	0	0	0	0	0	0.833	0.833	0	0	0.386	1.67	0	0
3	2015	27	2	57	0	0	8.57	4	0	10.4	0.833	0	0	0	0	0	0	0	0	0	0	8.33	0	0	0	0	0	8.33	11.7	15.8	13.3	3.33	80	11.7	0	0	0	0	0	0	0	0	0	0	0	1.81	1.67	0	0
3	2015	10	3	70	0	0	8.57	4	0	9.8	15.8	0	0	0	0	0	0	0	0	0	0	1.67	0	0	0	0	0.833	11.7	24.2	80.8	90	4.17	29.2	2.5	0	0.833	0	0	0	0	0.833	0	5.83	0	0	2.96	8.33	0	0
3	2015	20	3	80	0	0	8.57	4	0	10	7.5	0	0	0	0	0	0	0	0	0	0	0.833	0	0.833	0	0	1.67	15	19.2	13.3	21.7	9.17	14.2	0	0.833	0.833	0	0	0	0	0.833	0	2.5	0	0	1.01	3.33	0	0
3	2015	31	3	91	0	0	8.57	4	0	10.8	79.2	0	0	0	0	0	0	0	0	0.833	0	208	0	0	0	0	0	7.5	26.7	10.8	18.3	0	10	0	0	0	0	0	0	0	0	0	8.33	0	0	0.862	0.833	0	0
3	2015	13	4	103	0	0	8.57	4	0	10	0.833	0	0	0	0	0	0	0	0	0	0	1.67	0	0	0	0	0	15.8	17.5	2.5	5	0	32.5	0	0	0	0	0	0	0	0	0	0	0	0	0.97613	0	0	0
3	2015	23	4	113	0	0	8.57	4	0	10.4	879	0	0	0	0	0.833	0	0	0	0	0	125	0	0	0	0	0.833	8.33	54.2	14.2	5.83	2.5	97.8	0	0	0	0	0	0	0	0	0.833	11.7	0	0	3.45792	2.5	0	0
3	2015	30	4	120	0	0	8.57	4	0	12	1410	0	0	0	0	0	0	0	0	0	0	4.17	0	0	0	0	0	4.17	11.7	5.83	8.33	0	16.7	0	0	0	0	0	0	0	0	0	9.17	0	0	1.16	0.833	0	0
3	2015	12	5	132	0	0	8.57	4	0	14.2	2810	0	0	0	0	0	0	0	0	0	0	0	0	0	0	0	0	5	20.8	0.833	0.833	1.67	23.3	0	0	0	0	0	0	0	0	0	10	0	0	1.29	1.67	1.67	0
3	2015	20	5	140	0	0	8.57	4	0	17.8	8920	0	0	0	0	0	0	0	0	0	0	0	0	0	7.5	0	0	0	6.67	10.8	0.833	0	44.2	0	10.8	0	0	0	0	0	0	0	22.5	0	0.833	2.9173	0.833	6.67	0
3	2015	1	6	151	0	0	8.57	4	0	20	18300	0	0	0	0	0	0	0	0	0	0	0	0	0	4020	0	0	9.17	7.5	17.5	5.83	4.17	129	0	51.7	0	0	0	0	0	0	24.2	41.7	1.67	0.833	12.0261	1.67	5.83	0
3	2015	10	6	160	0	0	8.57	4	0	20.4	8950	0	0	0	0	0	0	0	0	0	0	0	0	0	5	0	0	2.5	0	0.833	0	0	4.17	0	0.833	0	0	0	0	0	0	7.5	0.833	0	0	0.22595	0	0	0.833
3	2015	19	6	169	0	0	8.57	4	0	23.6	33.3	0.833	0	0	0	0	0	0	0	0	1.67	0	0	0	217	0	0	3.33	3.33	0	0.833	3.33	1.67	0	80.8	0	0	0	0	0	0	5	25	4.17	0	3.649	0.833	4.17	4.17
3	2015	30	6	180	0	0	8.57	4	0	23.8	14.2	0	0	0	0	0	0	0	0	0.833	0	0	4.17	0	148	1.67	0.833	1.67	0.833	5	0	1.67	35.8	0	20	0	0	0	0	0	0	0	5	3.33	0	3.7901	2.5	168	0
3	2015	10	7	190	0	0	8.57	4	0	25.8	8.33	3.33	10	4.17	14.17	0	0.833	0	0	0	0	0	60.8	0.833	20	0	0	3.33	5	47.5	0	3.33	35	0	18.3	0.833	0	0	0	0	0.833	1.67	11.7	10	0	5.794	20.8	55.8	1.67
3	2015	20	7	200	0	0	8.57	4	1	23.8	10.8	35	1.67	3.33	5	0	69.2	0	0	0	29.2	0	1960	32.5	2.5	95.8	0.833	71.7	87.5	76.7	3.33	40	217	10.8	87.5	0	0	0	0	0	0	31.7	242	5.83	2.5	36.9532	175	11.7	5.83
3	2015	30	7	210	0	0	8.57	4	1	25.8	0.833	19.2	0	6.67	6.67	0	14.2	0	0	0	0	0	367	0.833	10.8	2.5	0	46.7	55.8	1.67	0	58.3	18.3	0	56.7	0	0	0	0	0	0	28.3	13.3	4.17	0.833	8.9014	317	108	10
3	2015	10	8	220	0	0	8.57	4	0	26.6	0	0	0	0	0	0	0.833	0	0	0	0	0	392	2290	0	77.5	0	15	15.8	4.17	0	19.2	40	0	10.8	0	0	0	0	0	0	21.7	0	3.33	0	32.9371	1900	37.5	0
3	2015	21	8	231	0	0	8.57	4	1	25.6	1.67	27.5	0	0	0	0.833	19.2	0	0	0	0	0.833	1620	8.33	0	200	17.5	250	75	6.67	1.67	175	117	0	179	0	0.833	0.833	0	0.833	2.499	87.5	100	0	1.67	214.873	833	683	0
3	2015	31	8	241	0	0	8.57	4	0	25.6	0	0.833	0	0	0	0	0.833	0	0	0	0	0	28.3	2.5	0	4.17	0	5.83	5	0	0	11.7	5	0	38.3	0	0	0	0	0	0	36.7	1.67	0	1.67	3.28445	167	14.2	0
3	2015	10	9	250	0	0	8.57	4	0	25.4	0	5	0	0	0	0	0	0	0	0	0	0	1620	3.33	1.67	9.17	0	6.67	333	0	0	23.3	8.33	0	550	0	0	0	0	0	0	48.3	10.8	0	1.67	45.8977	1390	83.3	0
3	2015	21	9	261	0	0	8.57	4	0	24.2	2.5	1.67	0	0	0	0	2.5	0	0	0	0	0	65	0	0.833	0	0	83.3	152	32.5	0	17.5	13.3	0	300	0	0	0	0	0	0	67.5	58.3	0	0	10.3305	98.3	14.2	0
3	2015	30	9	270	0	0	8.57	4	0	25.1	0.833	0	6.67	0	6.67	0.833	18.3	0	0	0	0	0	123	60.8	0	24.2	0	30	225	0	0	29.2	5.83	0	325	0	0	0	0	0	0	122	2.5	0	0	13.4497	483	20.8	0
3	2015	23	10	293	0	0	8.57	4	0	20.2	0	0	0	0	0	0	0.833	0	0	0	0	0	45.8	2.5	0	1.67	0	58.3	107	217	0	65	15.8	0	146	0	0	0	0	0	0	69.2	143	0	0	8.20323	157	10	0
3	2015	2	11	302	0	0	8.57	4	0	15	10	0	0	0	0	0	0	0	0	0	0	0	3.33	0	0	0.833	0	60	213	452	8.33	178	75	0.833	145	0	0	0	0	0	0	45	182	0	0	11.6997	14.2	3.33	0
3	2015	10	11	310	0	0	8.57	4	0	16.6	0	0	0	0	0	0	1.67	0	0	0	0	0	2.5	0	3.33	0	0	5.83	45	205	0	18.3	33.3	0	25.8	0	0	0	0	0	0	0.833	0	0	0	2.6637	4.17	2.5	0
3	2015	23	11	323	1	1	8.57	4	0	15	0	0	0	0	0	0	0	0	0	0	0	0	0	0	0	0	0	1.67	3.33	6.67	0	0	10.8	0	0	0	0	0	0	0	0	0	0.833	0	0	0.408	16.7	2.5	0
3	2015	3	12	333	0	1	8.57	4	0	13	0	0	0	0	0	0	0.833	0	0	0	0	0	0	0	0	0	0	2.5	11.7	44.2	7.5	14.2	10	0	0	0	0	0	0	0	0	0	1.67	0	0	0.909	3.33	0	0
3	2015	18	12	348	0	0	8.57	4	0	10.4	0.833	0	0	0	0	0	0	0	0	0	0	0.833	0	0	0	0	0	8.33	48.3	207	51.7	14.2	5	3.33	0	0	0	0	0	0	0	0.833	3.33	0	0	2.72	3.33	0.833	0
3	2015	29	12	359	0	1	8.57	4	0	12	5.83	0	0	0	0	0	0	0	0	0	0	0	0	0	0	0	0	2.5	4.17	4.17	0	0	0	0.833	0	0	0	0	0	0	0	0	0	0	0	0.11323	1.67	0	0
3	2016	14	1	14	0	0	8.57	4	0	10.6	0	0	0	0	0	0	0	0	0	0	0	0	0	0	0	0	0	0	0	1.67	0	0	0	0	0	0	0	0	0	0	0	0	0	0	0	0	0	0	0
3	2016	21	1	21	0	0	8.57	4	0	10	0	0	0	0	0	0	0	0	0	0	0	0	0	0	0	0	0	0.833	4.17	10	13.3	0	15.8	2.5	0	0	0	0	0	0	0	0	0	0	0	0	1.67	0	0
3	2016	2	2	32	0	0	8.57	4	1	9	1.67	0	0	0	0	0	0	0	0	0	0	0	0	0	0.833	0	0	7.5	20	30	8.33	0	178	0	0	0	0	0	0	0	0	0	0	0	0	0	1.67	0	0
3	2016	10	2	40	0	0	8.57	4	0	9	0	0	0	0	0	0	0	0	0	0	0	0	0	0	0	0	0	2.5	5	28.3	23.3	0	5.83	0.833	0	0	0	0	0	0	0	0	0	0	0	0	0	0	0
3	2016	19	2	49	0	0	8.57	4	1	9	1.67	0	0	0	0	0	0	0	0	0	0	0	0	0	0	0	0	0	7.5	5.83	3.33	0	24.2	0	0	0	0	0	0	0	0	0	0	0	0	0	0.833	0	0
3	2016	29	2	59	0	0	8.57	4	0	10	212	0	0	0	0	0	0	0	0	0	0	15	0	0	0	0	6.67	38.3	91.7	62.5	10	0.833	63.3	6.67	0	0.833	0	0	0	0	0.833	0	8.33	0	0	0	2.5	0.833	0
3	2016	10	3	70	0	0	8.57	4	0	10.4	1060	0	0	0	0	0	0	0	0	0	0	0	0.833	0	0	0	0.833	25	150	20	19.2	0.833	192	0	0	0	0.833	0	0	0	0.833	0	1.67	0	0	0	6.67	0	0
3	2016	21	3	81	0	0	8.57	4	0	8.2	50	0	0	0	0	0	0	0	0	0	0	0	0.833	0	0	0	0	5.83	2.5	6.67	1.67	0	3.33	0	0	0.833	0	0	0	0	0.833	0.833	0	0	0	0	0	0.833	0
3	2016	30	3	90	0	0	8.57	4	0	9.4	100	0	0	0	0	0	0	0	0	0	0	0	0	0	0	0	0	2.5	4.17	2.5	10	0	6.67	0	0	0.833	0	0	0	0	0.833	0	0.833	0	0	0	0	0	0
3	2016	11	4	101	0	0	8.57	4	0	11.8	231	0	0	0	0	0	0	0	0	0	0	2.5	0	0	1.67	0.833	1.67	20.8	55.8	22.5	18.3	0	43.3	3.33	0	0	0	0	0	0	0	0	8.33	0	0	0	0	0	0
3	2016	25	4	115	0	0	8.57	4	0	13	2880	0	0	0	0	0	0	0	0	0	0	5	15	0	151	0.833	4.17	10	41.7	8.33	25.8	1.67	103	5	4.17	0	0.833	0	0	1.67	2.503	4.17	29.2	0	0	0	5	3.33	0
3	2016	29	4	119	0	0	8.57	4	0	13	23.3	0	0	0	0	0	0	0	0	0	0	0	0	0	4.17	0	0	5.83	16.7	2.5	5.83	0	60	0	0	0	0	0	0	0.833	0.833	0	0.833	0	0	0	0	0	0
3	2016	11	5	131	0	0	8.57	4	0	15.5	2460	0	0	0	0	0	0	0	0	0	0	0	0	0	608	0.833	0	7.5	45.8	37.5	17.5	1.67	22.5	0	15	0.833	0	0	0	0	0.833	0	27.5	0	0	0	1.67	7.5	0
3	2016	20	5	140	0	0	8.57	4	0	18.1	405	0	0	0	0	0	0	0	0	0	0	0	9.17	1.67	310	0	1.67	5.83	107	11.7	12.5	3.33	508	0	8.33	0	0	0	0	0	0	0.833	4.17	0	0	0	3.33	10.8	0
3	2016	1	6	151	0	0	8.57	4	0	19.2	658	4.17	0	0	0	0	0	0	0	0	0	0	18.3	4.17	542	0	0	75	83.3	17.5	0.833	5.83	125	1.67	23.3	0	0	0	0	0.833	0.833	5.83	5	0.833	0	0	3.33	11.7	0
3	2016	9	6	159	0	0	8.57	4	0	19.4	267	0.833	0	0	0	0	0	0	0	0	1.67	0	0	0.833	2330	1.67	0	16.7	5.83	15.8	13.3	70	15	0.833	4.17	0	0	0	0	0	0	24.2	21.7	0	0	8.33	8.33	14.2	0
3	2016	21	6	171	0	0	8.57	4	0	24.2	1030	0	0	0	0	0	0	0	0	0	0	0	0.833	0	2100	0	0	25	9.17	18.3	0	25	12.5	0.833	9.17	0	0	0	0	0	0	146	15	10.8	0	0	0	0.833	0
3	2016	30	6	180	0	0	8.57	4	0	25	23.3	0	0	0	0	0	0	0	0	0	0	0	19.2	1.67	1240	7.5	0	17.5	87.5	11.7	1.67	65	56.7	3.33	429	0.833	0.833	0.833	0	0	2.499	25	10.8	10	1.67		1.67	70	1.67
3	2016	11	7	191	0	0	8.57	4	1	24	5	55.8	39.2	0	39.2	2.5	1.67	0	0	0	0	0	1410	0	5	0	0	3.33	5.83	8.33	0	2.5	28.3	0.833	8.33	0.833	0	0	0	0	0.833	18.3	38.3	3.33	0		36.7	8.33	0
3	2016	21	7	201	0	0	8.57	4	0	25.4	1.67	0	0	0.833	0.833	0.833	0	0.833	0	0	1.67	0	3920	0	4.17	96.7	0	58.3	33.3	112	0	288	375	0	23.3	0	0	0	0	0	0	175	5	0.833	0.833		37.5	0	0
3	2016	1	8	211	0	0	8.57	4	0	26.4	3.33	2.5	0	0	0	0	5.83	1.67	0	0	8.33	0	408	1.67	0.833	85.8	0	69.2	16.7	0	0	11.7	333	0	63.3	0	0	0	0	0	0	64.2	0	0	0		552	58.3	0
3	2016	11	8	221	0	0	8.57	4	0	27	2.5	0	0	0	0	0.833	0	0	0	0	5	0	3080	1.67	0	41.7	0	2.5	1.67	0	0	7.5	30.8	0	8.33	0	0	0	0	0	0	9.17	0	0	0.833		583	17.5	0
3	2016	22	8	232	0	0	8.57	4	0	27.2	0	0.833	0	0	0	0.833	1.67	0	0	0	104	0	1560	10.8	0.833	238	3.33	7.5	121	0	0	5.83	18.3	0	146	0	0	0	0	0	0	27.5	0	0	0.833		1570	204	0
3	2016	31	8	241	0	0	8.57	4	0	27	7.5	1.67	0	0	0	0	1.67	0	0	0	15	0	1560	0.833	0	19.2	0	1.67	112	0.833	0	11.7	55.8	0	267	0	0	0	0	0	0	54.2	0	0.833	0		98.3	3.33	0
3	2016	9	9	249	0	0	8.57	4	0	26	0	2.5	0	0	0	0	0	0	0	0	58.3	0	675	6.67	0	6.67	0	0	6.67	0	0	5	21.7	0	64.2	0	0	0	0	0	0	12.5	0	0	0.833		142	1.67	0
3	2016	22	9	262	0	0	8.57	4	0	24	5.83	2.5	0	0	0	0	2.5	0	0	0	10	0	3030	55.8	4.17	10.8	0	0	4.17	0	0	2.5	6.67	0	30.8	0.833	0	0	0	0	0.833	17.5	19.2	0	0.833		87.5	1.67	0
3	2016	29	9	269	0	0	8.57	4	0	21.6	0	0	0	0	0	0	0	0	0	0	8.33	0	283	7.5	0	0.833	0	5	36.7	317	0	33.3	200	0	129	0	0	0	0	0	0	117	95.8	0	0		9.17	3.33	0
3	2016	11	10	281	0	0	8.57	4	0	20.2	1.67	0.833	0	0	0	0	0	0	0	0	6.67	0	69.2	7.5	0.833	0	0	11.7	258	450	0	10	38.3	0	529	0	0	0	0	0	0	87.5	13.3	0	0		31.7	5.83	0
3	2016	21	10	291	0	0	8.57	4	1	15.8	283	0	0	0	0	0	0	0	0	0	0	0	5	0	0	0	0	41.7	87.5	417	55.8	5.83	129	9.17	65	9.17	0	0	0	0	9.17	192	242	0.833	0		7.5	0.833	0
3	2016	31	10	301	0	0	8.57	4	1	15.8	0	0	0	0	0	0	0	0	0	0	0.833	0	7.5	0	0	0	0	5.83	5.83	23.3	0	3.33	8.33	0	0.833	0	0	0	0	0	0	2.5	0	0	0	0	0.833	0	0
3	2016	10	11	310	0	0	8.57	4	0	16.4	0	0	0	0	0	0	0	0	0	0	0	0	0.833	0	0	0	0	264	19.2	242	0.833	8.33	35	0	20	4.17	0	0	0	0	4.17	0.833	0	0	0	0	142	10	0
3	2016	21	11	321	0	0	8.57	4	0	13.8	0	0	0	0	0	0	0	0	0	0	0	0	0	0	0	0	3.33	371	250	205	25	132	516	12.5	15	7.5	0	0	0	0	7.5	0.833	5.83	0	0	0	25.8	0.833	0
3	2016	30	11	330	0	0	8.57	4	0	12.6	6.67	0	0	0	0	0	0	0	0	0	0.833	0	0	0	0	0	0.833	55.8	13.3	367	188	21.7	171	1.67	0.833	1.67	0	0	0	0	1.67	4.17	10.8	0.833	0	0	5	0	0
3	2016	8	12	338	0	0	8.57	4	0	9.2	2.5	0	0	0	0	0.833	0	0.833	0	0	0	0	0	0	0	0	0	642	58.3	517	375	4.17	183	0	2.5	4.17	0	0	0	0	4.17	0	0	0	0		1.67	0	0
3	2016	21	12	351	0	0	8.57	4	1	8.6	0	0	0	0	0	0	0	0	0	0	0	0	0	0	0	0	0	0.833	6.67	11.7	0	0	0.833	0	0	0	0	0	0	0	0	0	0	0	0	0	3.33	0	0
3	2016	29	12	359	0	0	8.57	4	0	9.6	0	0	0	0	0	0	0	0	0	0	0	0	0	0	0	0	0	0	0	15	4.17	0	0.833	0	0	0	0	0	0	0	0	0	0	0	0	0	1.67	0	0
[truncated: 14 more columns]
